# Supplementary material for: Complex regulation of Gephyrin splicing is a determinant of inhibitory postsynaptic diversity
Source: Research Square preprint supplement (doi:10.21203/rs.3.rs-1111489/v1), 2021-12-16
Supplement: Supplementary file 1 [file 0b3635c22cce5b96720d5883.xlsx]

## Sheet: Feuil1
>GPHN_1
CCACGACCATCAAATCCGTGTCGGAGTCCTCACAGTGAGTGATAGCTGCTTCAGGAATCTTGCAGAAGACCGCAGTGGGATAAATCTAAAAGATCTTGTCCAAGATCCTTCTTTGTTGGGTGGGACTATATCGGCATACAAGATAGTACCAGATGAAATAGAAGAAATCAAGGAAACACTCATAGACTGGTGTGATGAAAAGGAACTTAATTTAATATTAACAACTGGAGGAACGGGGTTTGCACCACGAGATGTCACTCCAGAGGCCACAAAAGAAGTAATAGAGCGGGAAGCGCCAGGGATGGCCCTGGCAATGCTGATGGGATCGCTCAATGTCACACCTCTGGGCATGCTCTCTAGACCAGTGTGTGGAATAAGGGGGAAAACTCTGATAATTAA…
>GPHN_2
CCACGACCATCAAATCCGTGTCGGAGTCCTCACAGTGAGTGATAGCTGCTTCAGGAATCTTGCAGAAGACCGCAGTGGGATAAATCTAAAAGATCTTGTCCAAGATCCTTCTTTGTTGGGTGGGACTATATCGGCATACAAGATAGTACCAGATGAAATAGAAGAAATCAAGGAAACACTCATAGACTGGTGTGATGAAAAGGAACTTAATTTAATATTAACAACTGGAGGAACGGGGTTTGCACCACGAGATGTCACTCCAGAGGCCACAAAAGAAGTAATAGAGCGGGAAGCGCCAGGGATGGCCCTGGCAATGCTGATGGGATCGCTCAATGTCACACCTCTGGGCATGCTCTCTAGACCAGTGTGTGGAATAAGGGGGAAAACTCTGATAATTAA…
>GPHN_3
CCACGACCATCAAATCCGTGTCGGAGTCCTCACAGTGAGTGATAGCTGCTTCAGGAATCTTGCAGAAGACCGCAGTGGGATAAATCTAAAAGATCTTGTCCAAGATCCTTCTTTGTTGGGTGGGACTATATCGGCATACAAGATAGTACCAGATGAAATAGAAGAAATCAAGGAAACACTCATAGACTGGTGTGATGAAAAGGAACTTAATTTAATATTAACAACTGGAGGAACGGGGTTTGCACCACGAGATGTCACTCCAGAGAAATTCCCAACATTCCCATTTTGTGGGCTCCAGAAAGGGGCCACAAAAGAAGTAATAGAGCGGGAAGCGCCAGGGATGGCCCTGGCAATGCTGATGGGATCGCTCAATGTCACACCTCTGGGCATGCTCTCTAG…
>GPHN_4
CCACGACCATCAAATCCGTGTCGGAGTCCTCACAGTGAGTGATAGCTGCTTCAGGAATCTTGCAGAAGACCGCAGTGGGATAAATCTAAAAGATCTTGTCCAAGATCCTTCTTTGTTGGGTGGGACTATATCGGCATACAAGATAGTACCAGATGAAATAGAAGAAATCAAGGAAACACTCATAGACTGGTGTGATGAAAAGGAACTTAATTTAATATTAACAACTGGAGGAACGGGGTTTGCACCACGAGATGTCACTCCAGAGGCCACAAAAGAAGTAATAGAGCGGGAAGCGCCAGGGATGGCCCTGGCAATGCTGATGGGATCGCTCAATGTCACACCTCTGGGCATGCTCTCTAGACCAGTGTGTGGAATAAGGGGGAAAACTCTGATAATTAA…
>GPHN_5
CCACGACCATCAAATCCGTGTCGGAGTCCTCACAGGTCACAGTGCTGTAGATATCACCAAGGTGGCTAGAAGACATCGCATGTCTCCTTTTCCCCTGACGTCTATGGACAAAGCCTTCATTACAGTCCTGGAGATGACTCCGGTGCTTGGTACAGAAATCATCAATTACCGAGATGGAATGGGGCGAGTCCTTGCTCAAGATGTATATGCAAAAGACAACCTACCCCCATTCCCTGCATCAGTAAAAGATGGCTATGCTGTTCGAGCTGCTGATGGTCCAGGGGATCGTTTCATCATTGGGGAATCCCAAGCTGGTGAGCAGCCAACTCAGACAGTAATGCCAGGACAAGTGATGCGGGTTACAACAGGTGCTCCAATCCCCTGCGGTGCTGATGCAGT…
>GPHN_6
CCACGACCATCAAATCCGTGTCGGAGTCCTCACAGTGAGTGATAGCTGCTTCAGGAATCTTGCAGAAGACCGCAGTGGGATAAATCTAAAAGATCTTGTCCAAGATCCTTCTTTGTTGGGTGGGACTATATCGGCATACAAGATAGTACCAGATGAAATAGAAGAAATCAAGGAAACACTCATAGACTGGTGTGATGAAAAGGAACTTAATTTAATATTAACAACTGGAGGAACGGGGTTTGCACCACGAGATGTCACTCCAGAGGCCACAAAAGAAGTAATAGAGCGGGAAGCGCCAGGGATGGCCCTGGCAATGCTGATGGGATCGCTCAATGTCACACCTCTGGGCATGCTCTCTAGACCAGTGTGTGGAATAAGGGGGAAAACTCTGATAATTAA…
>GPHN_7
CCACGACCATCAAATCCGTGTCGGAGTCCTCACAGATGGAATGGGGCGAGTCCTTGCTCAAGATGTATATGCAAAAGACAACCTACCCCCATTCCCTGCATCAGTAAAAGATGGCTATGCTGTTCGAGCTGCTGATGGTCCAGGGGATCGTTTCATCATTGGGGAATCCCAAGCTGGTGAGCAGCCAACTCAGACAGTAATGCCAGGACAAGTGATGCGGGTTACAACAGGTGCTCCAATCCCCTGCGGTGCTGATGCAGTAGTGCAAGTTGAAGATACTGAACTCATCAGGGAATCAGATGATGGTACTGAAGAACTTGAAGTACGAATTCTGGTGCAAGCTCGGCCAGGCCAAGATATCCGACCCATCGGCCATGACATTAAGAGAGGGGAGTGTGT…
>GPHN_8
CCACGACCATCAAATCCGTGTCGGAGTCCTCACAGTGAGTGATAGCTGCTTCAGGAATCTTGCAGAAGACCGCAGTGGGATAAATCTAAAAGATCTTGTCCAAGATCCTTCTTTGTTGGGTGGGACTATATCGGCATACAAGATAGTACCAGATGAAATAGAAGAAATCAAGGAAACACTCATAGACTGGTGTGATGAAAAGGAACTTAATTTAATATTAACAACTGGAGGAACGGGGTTTGCACCACGAGATGTCACTCCAGAGGCCACAAAAGAAGTAATAGAGCGGGAAGCGCCAGGGATGGCCCTGGCAATGCTGATGGGATCGCTCAATGTCACACCTCTGGGCATGCTCTCTAGACCAGTGTGTGGAATAAGGGGGAAAACTCTGATAATTAA…
>GPHN_9
CCACGACCATCAAATCCGTGTCGGAGTCCTCACAGTGAGTGATAGCTGCTTCAGGAATCTTGCAGAAGACCGCAGTGGGATAAATCTAAAAGATCTTGTCCAAGATCCTTCTTTGTTGGGTGGGACTATATCGGCATACAAGATAGTACCAGATGAAATAGAAGAAATCAAGGAAACACTCATAGACTGGTGTGATGAAAAGGAACTTAATTTAATATTAACAACTGGAGGAACGGGGTTTGCACCACGAGATGTCACTCCAGAGGCCACAAAAGAAGTAATAGAGCGGGAAGCGCCAGGGATGGCCCTGGCAATGCTGATGGGATCGCTCAATGTCACACCTCTGGGCATGCTCTCTAGACCAGTGTGTGGAATAAGGGGGAAAACTCTGATAATTAA…
>GPHN_10
CCACGACCATCAAATCCGTGTCGGAGTCCTCACAGTGAGTGATAGCTGCTTCAGGAATCTTGCAGAAGACCGCAGTGGGATAAATCTAAAAGATCTTGTCCAAGATCCTTCTTTGTTGGGTGGGACTATATCGGCATACAAGATAGTACCAGATGAAATAGAAGAAATCAAGGAAACACTCATAGACTGGTGTGATGAAAAGGAACTTAATTTAATATTAACAACTGGAGGAACGGGGTTTGCACCACGAGATGTCACTCCAGAGGCCACAAAAGAAGTAATAGAGCGGGAAGCGCCAGGGATGGCCCTGGCAATGCTGATGGGATCGCTCAATGTCACACCTCTGGGCATGCTCTCTAGACCAGTGTGTGGAATAAGGGGGAAAACTCTGATAATTAA…
>GPHN_11
CCACGACCATCAAATCCGTGTCGGAGTCCTCACAGTGAGTGATAGCTGCTTCAGGAATCTTGCAGAAGACCGCAGTGGGATAAATCTAAAAGATCTTGTCCAAGATCCTTCTTTGTTGGGTGGGACTATATCGGCATACAAGATAGTACCAGATGAAATAGAAGAAATCAAGGAAACACTCATAGACTGGTGTGATGAAAAGGAACTTAATTTAATATTAACAACTGGAGGAACGGGGTTTGCACCACGAGATGTCACTCCAGAGGCCACAAAAGAAGTAATAGAGCGGGAAGCGCCAGGGATGGCCCTGGCAATGCTGATGGGATCGCTCAATGTCACACCTCTGGGCATGCTCTCTAGACCAGTGTGTGGAATAAGGGGGAAAACTCTGATAATTAA…
>GPHN_12
CCACGACCATCAAATCCGTGTCGGAGTCCTCACAGTGAGTGATAGCTGCTTCAGGAATCTTGCAGAAGACCGCAGTGGGATAAATCTAAAAGATCTTGTCCAAGATCCTTCTTTGTTGGGTGGGACTATATCGGCATACAAGATAGTACCAGATGAAATAGAAGAAATCAAGGAAACACTCATAGACTGGTGTGATGAAAAGGAACTTAATTTAATATTAACAACTGGAGGAACGGGGTTTGCACCACGAGATGTCACTCCAGAGGCCACAAAAGAAGTAATAGAGCGGGAAGCGCCAGGGATGGCCCTGGCAATGCTGATGGGATCGCTCAATGTCACACCTCTGGGCATGCTCTCTAGACCAGTGTGTGGAATAAGGGGGAAAACTCTGATAATTAA…
>GPHN_13
CCACGACCATCAAATCCGTGTCGGAGTCCTCACAGTGAGTGATAGCTGCTTCAGGAATCTTGCAGAAGACCGCAGTGGGATAAATCTAAAAGATCTTGTCCAAGATCCTTCTTTGTTGGGTGGGACTATATCGGCATACAAGATAGTACCAGATGAAATAGAAGAAATCAAGGAAACACTCATAGACTGGTGTGATGAAAAGGAACTTAATTTAATATTAACAACTGGAGGAACGGGGTTTGCACCACGAGATGTCACTCCAGAGAAATTCCCAACATTCCCATTTTGTGGGCTCCAGAAAGGGGCCACAAAAGAAGTAATAGAGCGGGAAGCGCCAGGGATGGCCCTGGCAATGCTGATGGGATCGCTCAATGTCACACCTCTGGGCATGCTCTCTAG…
>GPHN_14
CCACGACCATCAAATCCGTGTCGGAGTCCTCACAGTGAGTGATAGCTGCTTCAGGAATCTTGCAGAAGACCGCAGTGGGATAAATCTAAAAGATCTTGTCCAAGATCCTTCTTTGTTGGGTGGGACTATATCGGCATACAAGATAGTACCAGATGAAATAGAAGAAATCAAGGCCACAAAAGAAGTAATAGAGCGGGAAGCGCCAGGGATGGCCCTGGCAATGCTGATGGGATCGCTCAATGTCACACCTCTGGGCATGCTCTCTAGACCAGTGTGTGGAATAAGGGGGAAAACTCTGATAATTAACCTACCTGGTAGCAAGAAAGGATCTCAGGAATGCTTTCAGTTCATACTGCCAGCTCTACCTCATGCCATTGACCTTTTACGTGATGCCATTGT…
>GPHN_15
CCACGACCATCAAATCCGTGTCGGAGTCCTCACAGGTCCAGTCCAGGTGCAGCAGCAAGGAGAACATTCTAAGAGCCAGTCACAGTGCTGTAGATATCACCAAGGTGGCTAGAAGACATCGCATGTCTCCTTTTCCCCTGACGTCTATGGACAAAGCCTTCATTACAGTCCTGGAGATGACTCCGGTGCTTGGTACAGAAATCATCAATTACCGAGATGGAATGGGGCGAGTCCTTGCTCAAGATGTATATGCAAAAGACAACCTACCCCCATTCCCTGCATCAGTAAAAGATGGCTATGCTGTTCGAGCTGCTGATGGTCCAGGGGATCGTTTCATCATTGGGGAATCCCAAGCTGGTGAGCAGCCAACTCAGACAGTAATGCCAGGACAAGTGATGC…
>GPHN_16
CCACGACCATCAAATCCGTGTCGGAGTCCTCACAGTGAGTGATAGCTGCTTCAGGAATCTTGCAGAAGACCGCAGTGGGATAAATCTAAAAGATCTTGTCCAAGATCCTTCTTTGTTGGGTGGGACTATATCGGCATACAAGATAGTACCAGATGAAATAGAAGAAATCAAGGAAACACTCATAGACTGGTGTGATGAAAAGGAACTTAATTTAATATTAACAACTGGAGGAACGGGGTTTGCACCACGAGATGTCACTCCAGAGAAATTCCCAACATTCCCATTTTGTGGGCTCCAGAAAGGGGCCACAAAAGAAGTAATAGAGCGGGAAGCGCCAGGGATGGCCCTGGCAATGCTGATGGGATCGCTCAATGTCACACCTCTGGGCATGCTCTCTAG…
>GPHN_17
CCACGACCATCAAATCCGTGTCGGAGTCCTCACAGTGAGTGATAGCTGCTTCAGGAATCTTGCAGAAGACCGCAGTGGGATAAATCTAAAAGATCTTGTCCAAGATCCTTCTTTGTTGGGTGGGACTATATCGGCATACAAGATAGTACCAGATGAAATAGAAGAAATCAAGGAAACACTCATAGACTGGTGTGATGAAAAGGAACTTAATTTAATATTAACAACTGGAGGAACGGGGTTTGCACCACGAGATGTCACTCCAGAGGCCACAAAAGAAGTAATAGAGCGGGAAGCGCCAGGGATGGCCCTGGCAATGCTGATGGGATCGCTCAATGTCACACCTCTGGGCATGCTCTCTAGACCAGTGTGTGGAATAAGGGGGAAAACTCTGATAATTAA…
>GPHN_18
CCACGACCATCAAATCCGTGTCGGAGTCCTCACAGTGAGTGATAGCTGCTTCAGGAATCTTGCAGAAGACCGCAGTGGGATAAATCTAAAAGATCTTGTCCAAGATCCTTCTTTGTTGGGTGGGACTATATCGGCATACAAGATAGTACCAGATGAAATAGAAGAAATCAAGGAAACACTCATAGACTGGTGTGATGAAAAGGAACTTAATTTAATATTAACAACTGGAGGAACGGGGTTTGCACCACGAGATGTCACTCCAGAGGCCACAAAAGAAGTAATAGAGCGGGAAGCGCCAGGGATGGCCCTGGCAATGCTGATGGGATCGCTCAATGTCACACCTCTGGGCATGCTCTCTAGACCAGTGTGTGGAATAAGGGGGAAAACTCTGATAATTAA…
>GPHN_19
CCACGACCATCAAATCCGTGTCGGAGTCCTCACAGTGAGTGATAGCTGCTTCAGGAATCTTGCAGAAGACCGCAGTGGGATAAATCTAAAAGATCTTGTCCAAGATCCTTCTTTGTTGGGTGGGACTATATCGGCATACAAGATAGTACCAGATGAAATAGAAGAAATCAAGGAAACACTCATAGACTGGTGTGATGAAAAGGAACTTAATTTAATATTAACAACTGGAGGAACGGGGTTTGCACCACGAGATGTCACTCCAGAGGCCACAAAAGAAGTAATAGAGCGGGAAGCGCCAGGGATGGCCCTGGCAATGCTGATGGGATCGCTCAATGTCACACCTCTGGGCATGCTCTCTAGACCAGTGTGTGGAATAAGGGGGAAAACTCTGATAATTAA…
>GPHN_20
CCACGACCATCAAATCCGTGTCGGAGTCCTCACAGTGAGTGATAGCTGCTTCAGGAATCTTGCAGAAGACCGCAGTGGGATAAATCTAAAAGATCTTGTCCAAGATCCTTCTTTGTTGGGTGGGACTATATCGGCATACAAGATAGTACCAGATGAAATAGAAGAAATCAAGGAAACACTCATAGACTGGTGTGATGAAAAGGAACTTAATTTAATATTAACAACTGGAGGAACGGGGTTTGCACCACGAGATGTCACTCCAGAGCTGCTAAATCCTGAAGATGATCTCTTACCAGGAAAGATTCGGGACAGCAATCGATCAACACTTCTAGCAACAATTCAGGAACATGGTTACCCAACAATCAACCTGGGAATTGTAGGAGACAACCCAGATGACTT…
>GPHN_21
CCACGACCATCAAATCCGTGTCGGAGTCCTCACAGTGAGTGATAGCTGCTTCAGGAATCTTGCAGAAGACCGCAGTGGGATAAATCTAAAAGATCTTGTCCAAGATCCTTCTTTGTTGGGTGGGACTATATCGGCATACAAGATAGTACCAGATGAAATAGAAGAAATCAAGGAAACACTCATAGACTGGTGTGATGAAAAGGAACTTAATTTAATATTAACAACTGGAGGAACGGGGTTTGCACCACGAGATGTCACTCCAGAGGCCACAAAAGAAGTAATAGAGCGGGAAGCGCCAGGGATGGCCCTGGCAATGCTGATGGGATCGCTCAATGTCACACCTCTGGGCATGCTCTCTAGACCAGTGTGTGGAATAAGGGGGAAAACTCTGATAATTAA…
>GPHN_22
CCACGACCATCAAATCCGTGTCGGAGTCCTCACAGTGAGTGATAGCTGCTTCAGGAATCTTGCAGAAGACCGCAGTGGGATAAATCTAAAAGATCTTGTCCAAGATCCTTCTTTGTCACAGTGCTGTAGATATCACCAAGGTGGCTAGAAGACATCGCATGTCTCCTTTTCCCCTGACGTCTATGGACAAAGCCTTCATTACAGTCCTGGAGATGACTCCGGTGCTTGGTACAGAAATCATCAATTACCGAGATGGAATGGGGCGAGTCCTTGCTCAAGATGTATATGCAAAAGACAACCTACCCCCATTCCCTGCATCAGTAAAAGATGGCTATGCTGTTCGAGCTGCTGATGGTCCAGGGGATCGTTTCATCATTGGGGAATCCCAAGCTGGTGAGC…
>GPHN_23
CCACGACCATCAAATCCGTGTCGGAGTCCTCACAGTGAGTGATAGCTGCTTCAGGAATCTTGCAGAAGACCGCAGTGGGATAAATCTAAAAGATCTTGTCCAAGATCCTTCTTTGTTGGGTGGGACTATATCGGCATACAAGATAGTACCAGATGAAATAGAAGAAATCAAGGAAACACTCATAGACTGGTGTGATGAAAAGGAACTTAATTTAATATTAACAACTGGAGGAACGGGGTTTGCACCACGAGATGTCACTCCAGAGGCCACAAAAGAAGTAATAGAGCGGGAAGCGCCAGGGATGGCCCTGGCAATGCTGATGGGATCGCTCAATGTCACACCTCTGGGCATGCTCTCTAGACCAGTGTGTGGAATAAGGGGGAAAACTCTGATAATTAA…
>GPHN_24
CCACGACCATCAAATCCGTGTCGGAGTCCTCACAGGTTGGGTGGGACTATATCGGCATACAAGATAGTACCAGATGAAATAGAAGAAATCAAGGAAACACTCATAGACTGGTGTGATGAAAAGGAACTTAATTTAATATTAACAACTGGAGGAACGGGGTTTGCACCACGAGATGTCACTCCAGAGGCCACAAAAGAAGTAATAGAGCGGGAAGCGCCAGGGATGGCCCTGGCAATGCTGATGGGATCGCTCAATGTCACACCTCTGGGCATGCTCTCTAGACCAGTGTGTGGAATAAGGGGGAAAACTCTGATAATTAACCTACCTGGTAGCAAGAAAGGATCTCAGGAATGCTTTCAGTTCATACTGCCAGCTCTACCTCATGCCATTGACCTTTTA…
>GPHN_25
CCACGACCATCAAATCCGTGTCGGAGTCCTCACAGTGAGTGATAGCTGCTTCAGGAATCTTGCAGAAGACCGCAGTGGGATAAATCTAAAAGATCTTGTCCAAGATCCTTCTTTGTTGGGTGGGACTATATCGGCATACAAGATAGTACCAGATGAAATAGAAGAAATCAAGGAAACACTCATAGACTGGTGTGATGAAAAGGAACTTAATTTAATATTAACAACTGGAGGAACGGGGTTTGCACCACGAGATGTCACTCCAGAGGCCACAAAAGAAGTAATAGAGCGGGAAGCGCCAGGGATGGCCCTGGCAATGCTGATGGGATCGCTCAATGTCACACCTCTGGGCATGCTCTCTAGACCAGTGTGTGGAATAAGGGGGAAAACTCTGATAATTAA…
>GPHN_26
CCACGACCATCAAATCCGTGTCGGAGTCCTCACAGTGAGTGATAGCTGCTTCAGGAATCTTGCAGAAGACCGCAGTGGGATAAATCTAAAAGATCTTGTCCAAGATCCTTCTTTGTTGGGTGGGACTATATCGGCATACAAGATAGTACCAGATGAAATAGAAGAAATCAAGGAAACACTCATAGACTGGTGTGATGAAAAGGAACTTAATTTAATATTAACAACTGGAGGAACGGGGTTTGCACCACGAGATGTCACTCCAGAGGCCACAAAAGAAGTAATAGAGCGGGAAGCGCCAGGGATGGCCCTGGCAATGCTGATGGGATCGCTCAATGTCACACCTCTGGGCATGCTCTCTAGACCAGTGTGTGGAATAAGGGGGAAAACTCTGATAATTAA…
>GPHN_27
CCACGACCATCAAATCCGTGTCGGAGTCCTCACAGTGAGTGATAGCTGCTTCAGGAATCTTGCAGAAGACCGCAGTGGGATAAATCTAAAAGATCTTGTCCAAGATCCTTCTTTGTTGGGTGGGACTATATCGGCATACAAGATAGTACCAGATGAAATAGAAGAAATCAAGGAAACACTCATAGACTGGTGTGATGAAAAGGAACTTAATTTAATATTAACAACTGGAGGAACGGGGTTTGCACCACGAGATGTCACTCCAGAGGCCACAAAAGAAGTAATAGAGCGGGAAGCGCCAGGGATGGCCCTGGCAATGCTGATGGGATCGCTCAATGTCACACCTCTGGGCATGCTCTCTAGACCAGTGTGTGGAATAAGGGGGAAAACTCTGATAATTAA…
>GPHN_28
CCACGACCATCAAATCCGTGTCGGAGTCCTCACAGTGAGTGATAGCTGCTTCAGGAATCTTGCAGAAGACCGCAGTGGGATAAATCTAAAAGATCTTGTCCAAGATCCTTCTTTGTTGGGTGGGACTATATCGGCATACAAGATAGTACCAGATGAAATAGAAGAAATCAAGGAAACACTCATAGACTGGTGTGATGAAAAGGAACTTAATTTAATATTAACAACTGGAGGAACGGGGTTTGCACCACGAGATGTCACTCCAGAGGCCACAAAAGAAGTAATAGAGCGGGAAGCGCCAGGGATGGCCCTGGCAATGCTGATGGGATCGCTCAATGTCACACCTCTGGGCATGCTCTCTAGACCAGTGTGTGGAATAAGGGGGAAAACTCTGATAATTAA…
>GPHN_29
CCACGACCATCAAATCCGTGTCGGAGTCCTCACAGTGAGTGATAGCTGCTTCAGGAATCTTGCAGAAGACCGCAGTGGGATAAATCTAAAAGATCTTGTCCAAGATCCTTCTTTGTTGGGTGGGACTATATCGGCATACAAGATAGTACCAGATGAAATAGAAGAAATCAAGGAAACACTCATAGACTGGTGTGATGAAAAGGAACTTAATTTAATATTAACAACTGGAGGAACGGGGTTTGCACCACGAGATGTCACTCCAGAGGCCACAAAAGAAGTAATAGAGCGGGAAGCGCCAGGGATGGCCCTGGCAATGCTGATGGGATCGCTCAATGTCACACCTCTGGGCATGCTCTCTAGACCAGTGTGTGGAATAAGGGGGAAAACTCTGATAATTAA…
>GPHN_30
CCACGACCATCAAATCCGTGTCGGAGTCCTCACAGTGAGTGATAGCTGCTTCAGGAATCTTGCAGAAGACCGCAGTGGGATAAATCTAAAAGATCTTGTCCAAGATCCTTCTTTGTTGGGTGGGACTATATCGGCATACAAGATAGTACCAGATGAAATAGAAGAAATCAAGGAAACACTCATAGACTGGTGTGATGAAAAGGAACTTAATTTAATATTAACAACTGGAGGAACGGGGTTTGCACCACGAGATGTCACTCCAGAGGTCACAGTGCTGTAGATATCACCAAGGTGGCTAGAAGACATCGCATGTCTCCTTTTCCCCTGACGTCTATGGACAAAGCCTTCATTACAGTCCTGGAGATGACTCCGGTGCTTGGTACAGAAATCATCAATTAC…
>GPHN_31
CCACGACCATCAAATCCGTGTCGGAGTCCTCACAGTGAGTGATAGCTGCTTCAGGAATCTTGCAGAAGACCGCAGTGGGATAAATCTAAAAGATCTTGTCCAAGATCCTTCTTTGTTGGGTGGGACTATATCGGCATACAAGATAGTACCAGATGAAATAGAAGAAATCAAGGAAACACTCATAGACTGGTGTGATGAAAAGGAACTTAATTTAATATTAACAACTGGAGGAACGGGGTTTGCACCACGAGATGTCACTCCAGAGGCCACAAAAGAAGTAATAGAGCGGGAAGCGCCAGGGATGGCCCTGGCAATGCTGATGGGATCGCTCAATGTCACACCTCTGGGCATGCTCTCTAGACCAGTGTGTGGAATAAGGGGGAAAACTCTGATAATTAA…
>GPHN_32
CCACGACCATCAAATCCGTGTCGGAGTCCTCACAGTGAGTGATAGCTGCTTCAGGAATCTTGCAGAAGACCGCAGTGGGATAAATCTAAAAGATCTTGTCCAAGATCCTTCTTTGTTGGGTGGGACTATATCGGCATACAAGATAGTACCAGATGAAATAGAAGAAATCAAGGAAACACTCATAGACTGGTGTGATGAAAAGGAACTTAATTTAATATTAACAACTGGAGGAACGGGGTTTGCACCACGAGATGTCACTCCAGAGGCCACAAAAGAAGTAATAGAGCGGGAAGCGCCAGGGATGGCCCTGGCAATGCTGATGGGATCGCTCAATGTCACACCTCTGGGCATGCTCTCTAGACCAGTGTGTGGAATAAGGGGGAAAACTCTGATAATTAA…
>GPHN_33
CCACGACCATCAAATCCGTGTCGGAGTCCTCACAGGAAACACTCATAGACTGGTGTGATGAAAAGGAACTTAATTTAATATTAACAACTGGAGGAACGGGGTTTGCACCACGAGATGTCACTCCAGAGGCCACAAAAGAAGTAATAGAGCGGGAAGCGCCAGGGATGGCCCTGGCAATGCTGATGGGATCGCTCAATGTCACACCTCTGGGCATGCTCTCTAGACCAGTGTGTGGAATAAGGGGGAAAACTCTGATAATTAACCTACCTGGTAGCAAGAAAGGATCTCAGGAATGCTTTCAGTTCATACTGCCAGCTCTACCTCATGCCATTGACCTTTTACGTGATGCCATTGTAAAAGTAAAGGAGGTGCATGATGAACTTGAAGATTTACCTTCCC…
>GPHN_34
CCACGACCATCAAATCCGTGTCGGAGTCCTCACAGTGAGTGATAGCTGCTTCAGGAATCTTGCAGAAGACCGCAGTGGGATAAATCTAAAAGATCTTGTCCAAGATCCTTCTTTGTTGGGTGGGACTATATCGGCATACAAGATAGTACCAGATGAAATAGAAGAAATCAAGGAAACACTCATAGACTGGTGTGATGAAAAGGAACTTAATTTAATATTAACAACTGGAGGAACGGGGTTTGCACCACGAGATGTCACTCCAGAGGCCACAAAAGAAGTAATAGAGCGGGAAGCGCCAGGGATGGCCCTGGCAATGCTGATGGGATCGCTCAATGTCACACCTCTGGGCATGCTCTCTAGACCAGTGTGTGGAATAAGGGGGAAAACTCTGATAATTAA…
>GPHN_35
CCACGACCATCAAATCCGTGTCGGAGTCCTCACAGTGAGTGATAGCTGCTTCAGGAATCTTGCAGAAGACCGCAGTGGGATAAATCTAAAAGATCTTGTCCAAGATCCTTCTTTGTTGGGTGGGACTATATCGGCATACAAGATAGTACCAGATGAAATAGAAGAAATCAAGGAAACACTCATAGACTGGTGTGATGAAAAGGAACTTAATTTAATATTAACAACTGGAGGAACGGGGTTTGCACCACGAGATGTCACTCCAGAGAAATTCCCAACATTCCCATTTTGTGGGCTCCAGAAAGGGGTCCAGTCCAGGTGCAGCAGCAAGGAGAACATTCTAAGAGCCAGTCACAGTGCTGTAGATATCACCAAGGTGGCTAGAAGACATCGCATGTCTCC…
>GPHN_36
CCACGACCATCAAATCCGTGTCGGAGTCCTCACAGCCCACATAAACAGACAGAAGACAAAGGAGTTCAGTGTGAAGAAGAGGAAGAAGAAAAGAAAGACAGTGGTGTAGCTTCAACAGAAGATAGTTCCTCATCACATATAACTGCAGCAGCTCTTGCTGCAAAGATTCCAGACTCCATCATTTCTCGTGGTGTTCAGGTGCTCCCACGAGACACAGCCTCCCTTAGCACTACTCCTTCAGAATCGCCCCGTGCTCAGGCTACATCTCGCCTCTCTACAGCTTCTTGTCCAACACCAAAAGTCCAGTCCAGGTGCAGCAGCAAGGAGAACATTCTAAGAGCCAGTCACAGTGCTGTAGATATCACCAAGGTGGCTAGAAGACATCGCATGTCTCCTTTT…
>GPHN_37
CCACGACCATCAAATCCGTGTCGGAGTCCTCACAGGCCACAAAAGAAGTAATAGAGCGGGAAGCGCCAGGGATGGCCCTGGCAATGCTGATGGGATCGCTCAATGTCACACCTCTGGGCATGCTCTCTAGACCAGTGTGTGGAATAAGGGGGAAAACTCTGATAATTAACCTACCTGGTAGCAAGAAAGGATCTCAGGAATGCTTTCAGTTCATACTGCCAGCTCTACCTCATGCCATTGACCTTTTACGTGATGCCATTGTAAAAGTAAAGGAGGTGCATGATGAACTTGAAGATTTACCTTCCCCACCACCTCCTCTCTCTCCACCTCCTACAACTAGCCCACATAAACAGACAGAAGACAAAGGAGTTCAGTGTGAAGAAGAGGAAGAAGAAAAGA…
>GPHN_38
CCACGACCATCAAATCCGTGTCGGAGTCCTCACAGTGAGTGATAGCTGCTTCAGGAATCTTGCAGAAGACCGCAGTGGGATAAATCTAAAAGATCTTGTCCAAGATCCTTCTTTGTTGGGTGGGACTATATCGGCATACAAGATAGTACCAGATGAAATAGAAGAAATCAAGGAAACACTCATAGACTGGTGTGATGAAAAGGAACTTAATTTAATATTAACAACTGGAGGAACGGGGTTTGCACCACGAGATGTCACTCCAGAGAAATTCCCAACATTCCCATTTTGTGGGCTCCAGAAAGGGGCCACAAAAGAAGTAATAGAGCGGGAAGCGCCAGGGATGGCCCTGGCAATGCTGATGGGATCGCTCAATGTCACACCTCTGGGCATGCTCTCTAG…
>GPHN_39
CCACGACCATCAAATCCGTGTCGGAGTCCTCACAGTGAGTGATAGCTGCTTCAGGAATCTTGCAGAAGACCGCAGTGGGATAAATCTAAAAGATCTTGTCCAAGATCCTTCTTTGTTGGGTGGGACTATATCGGCATACAAGATAGTACCAGATGAAATAGAAGAAATCAAGGAAACACTCATAGACTGGTGTGATGAAAAGGAACTTAATTTAATATTAACAACTGGAGGAACGGGGTTTGCACCACGAGATGTCACTCCAGAGGCCACAAAAGAAGTAATAGAGCGGGAAGCGCCAGGGATGGCCCTGGCAATGCTGATGGGATCGCTCAATGTCACACCTCTGGGCATGCTCTCTAGACCAGTGTGTGGAATAAGGGGGAAAACTCTGATAATTAA…
>GPHN_40
CCACGACCATCAAATCCGTGTCGGAGTCCTCACAGACCAGTGTGTGGAATAAGGGGGAAAACTCTGATAATTAACCTACCTGGTAGCAAGAAAGGATCTCAGATTCCAGACTCCATCATTTCTCGTGGTGTTCAGGTGCTCCCACGAGACACAGCCTCCCTTAGCACTACTCCTTCAGAATCGCCCCGTGCTCAGGCTACATCTCGCCTCTCTACAGCTTCTTGTCCAACACCAAAAGTCCAGTCCAGGTGCAGCAGCAAGGAGAACATTCTAAGAGCCAGTCACAGTGCTGTAGATATCACCAAGGTGGCTAGAAGACATCGCATGTCTCCTTTTCCCCTGACGTCTATGGACAAAGCCTTCATTACAGTCCTGGAGATGACTCCGGTGCTTGGTACA…
>GPHN_41
CCACGACCATCAAATCCGTGTCGGAGTCCTCACAGTGAGTGATAGCTGCTTCAGGAATCTTGCAGAAGACCGCAGTGGGATAAATCTAAAAGATCTTGTCCAAGATCCTTCTTTGTTGGGTGGGACTATATCGGCATACAAGATAGTACCAGATGAAATAGAAGAAATCAAGGAAACACTCATAGACTGGTGTGATGAAAAGGAACTTAATTTAATATTAACAACTGGAGGAACGGGGTTTGCACCACGAGATGTCACTCCAGAGAAATTCCCAACATTCCCATTTTGTGGGCTCCAGAAAGGGGCCACAAAAGAAGTAATAGAGCGGGAAGCGCCAGGGATGGCCCTGGCAATGCTGATGGGATCGCTCAATGTCACACCTCTGGGCATGCTCTCTAG…
>GPHN_42
CCACGACCATCAAATCCGTGTCGGAGTCCTCACAGTGAGTGATAGCTGCTTCAGGAATCTTGCAGAAGACCGCAGTGGGATAAATCTAAAAGATCTTGTCCAAGATCCTTCTTTGTTGGGTGGGACTATATCGGCATACAAGATAGTACCAGATGAAATAGAAGAAATCAAGGAAACACTCATAGACTGGTGTGATGAAAAGGAACTTAATTTAATATTAACAACTGGAGGAACGGGGTTTGCACCACGAGATGTCACTCCAGAGGCCACAAAAGAAGTAATAGAGCGGGAAGCGCCAGGGATGGCCCTGGCAATGCTGATGGGATCGCTCAATGTCACACCTCTGGGCATGCTCTCTAGACCAGTGTGTGGAATAAGGGGGAAAACTCTGATAATTAA…
>GPHN_43
CCACGACCATCAAATCCGTGTCGGAGTCCTCACAGTGAGTGATAGCTGCTTCAGGAATCTTGCAGAAGACCGCAGTGGGATAAATCTAAAAGATCTTGTCCAAGATCCTTCTTTGTTGGGTGGGACTATATCGGCATACAAGATAGTACCAGATGAAATAGAAGAAATCAAGGAAACACTCATAGACTGGTGTGATGAAAAGGAACTTAATTTAATATTAACAACTGGAGGAACGGGGTTTGCACCACGAGATGTCACTCCAGAGGCCACAAAAGAAGTAATAGAGCGGGAAGCGCCAGGGATGGCCCTGGCAATGCTGATGGGATCGCTCAATGTCACACCTCTGGGCATGCTCTCTAGACCAGTGTGTGGAATAAGGGGGAAAACTCTGATAATTAA…
>GPHN_44
CCACGACCATCAAATCCGTGTCGGAGTCCTCACAGTGAGTGATAGCTGCTTCAGGAATCTTGCAGAAGACCGCAGTGGGATAAATCTAAAAGATCTTGTCCAAGATCCTTCTTTGTTGGGTGGGACTATATCGGCATACAAGATAGTACCAGATGAAATAGAAGAAATCAAGGAAACACTCATAGACTGGTGTGATGAAAAGGAACTTAATTTAATATTAACAACTGGAGGAACGGGGTTTGCACCACGAGATGTCACTCCAGAGGCCACAAAAGAAGTAATAGAGCGGGAAGCGCCAGGGATGGCCCTGGCAATGCTGATGGGATCGCTCAATGTCACACCTCTGGGCATGCTCTCTAGACCAGTGTGTGGAATAAGGGGGAAAACTCTGATAATTAA…
>GPHN_45
CCACGACCATCAAATCCGTGTCGGAGTCCTCACAGTGAGTGATAGCTGCTTCAGGAATCTTGCAGAAGACCGCAGTGGGATAAATCTAAAAGATCTTGTCCAAGATCCTTCTTTGTTGGGTGGGACTATATCGGCATACAAGATAGTACCAGATGAAATAGAAGAAATCAAGGAAACACTCATAGACTGGTGTGATGAAAAGGAACTTAATTTAATATTAACAACTGGAGGAACGGGGTTTGCACCACGAGATGTCACTCCAGAGGTCCAGTCCAGGTGCAGCAGCAAGGAGAACATTCTAAGAGCCAGTCACAGTGCTGTAGATATCACCAAGGTGGCTAGAAGACATCGCATGTCTCCTTTTCCCCTGACGTCTATGGACAAAGCCTTCATTACAGT…
>GPHN_46
CCACGACCATCAAATCCGTGTCGGAGTCCTCACAGTGAGTGATAGCTGCTTCAGGAATCTTGCAGAAGACCGCAGTGGGATAAATCTAAAAGATCTTGTCCAAGATCCTTCTTTGTTGGGTGGGACTATATCGGCATACAAGATAGTACCAGATGAAATAGAAGAAATCAAGGAAACACTCATAGACTGGTGTGATGAAAAGGAACTTAATTTAATATTAACAACTGGAGGAACGGGGTTTGCACCACGAGATGTCACTCCAGAGGCCACAAAAGAAGTAATAGAGCGGGAAGCGCCAGGGATGGCCCTGGCAATGCTGATGGGATCGCTCAATGTCACACCTCTGGGCATGCTCTCTAGACCAGTGTGTGGAATAAGGGGGAAAACTCTGATAATTAA…
>GPHN_47
CCACGACCATCAAATCCGTGTCGGAGTCCTCACAGTGAGTGATAGCTGCTTCAGGAATCTTGCAGAAGACCGCAGTGGGATAAATCTAAAAGATCTTGTCCAAGATCCTTCTTTGTTGGGTGGGACTATATCGGCATACAAGATAGTACCAGATGAAATAGAAGAAATCAAGGTCCAGTCCAGGTGCAGCAGCAAGGAGAACATTCTAAGAGCCAGTCACAGTGCTGTAGATATCACCAAGGTGGCTAGAAGACATCGCATGTCTCCTTTTCCCCTGACGTCTATGGACAAAGCCTTCATTACAGTCCTGGAGATGACTCCGGTGCTTGGTACAGAAATCATCAATTACCGAGATGGAATGGGGCGAGTCCTTGCTCAAGATGTATATGCAAAAGACAA…
>GPHN_48
CCACGACCATCAAATCCGTGTCGGAGTCCTCACAGTGAGTGATAGCTGCTTCAGGAATCTTGCAGAAGACCGCAGTGGGATAAATCTAAAAGATCTTGTCCAAGATCCTTCTTTGTTGGGTGGGACTATATCGGCATACAAGATAGTACCAGATGAAATAGAAGAAATCAAGGAAACACTCATAGACTGGTGTGATGAAAAGGAACTTAATTTAATATTAACAACTGGAGGAACGGGGTTTGCACCACGAGATGTCACTCCAGAGAAATTCCCAACATTCCCATTTTGTGGGCTCCAGAAAGGGGCCACAAAAGAAGTAATAGAGCGGGAAGCGCCAGGGATGGCCCTGGCAATGCTGATGGGATCGCTCAATGTCACACCTCTGGGCATGCTCTCTAG…
>GPHN_49
CCACGACCATCAAATCCGTGTCGGAGTCCTCACAGTGAGTGATAGCTGCTTCAGGAATCTTGCAGAAGACCGCAGTGGGATAAATCTAAAAGATCTTGTCCAAGATCCTTCTTTGTTGGGTGGGACTATATCGGCATACAAGATAGTACCAGATGAAATAGAAGAAATCAAGGAAACACTCATAGACTGGTGTGATGAAAAGGAACTTAATTTAATATTAACAACTGGAGGAACGGGGTTTGCACCACGAGATGTCACTCCAGAGAAATTCCCAACATTCCCATTTTGTGGGCTCCAGAAAGGGGCCACAAAAGAAGTAATAGAGCGGGAAGCGCCAGGGATGGCCCTGGCAATGCTGATGGGATCGCTCAATGTCACACCTCTGGGCATGCTCTCTAG…
>GPHN_50
CCACGACCATCAAATCCGTGTCGGAGTCCTCACAGTGAGTGATAGCTGCTTCAGGAATCTTGCAGAAGACCGCAGTGGGATAAATCTAAAAGATCTTGTCCAAGATCCTTCTTTGTTGGGTGGGACTATATCGGCATACAAGATAGTACCAGATGAAATAGAAGAAATCAAGGAAACACTCATAGACTGGTGTGATGAAAAGGAACTTAATTTAATATTAACAACTGGAGGAACGGGGTTTGCACCACGAGATGTCACTCCAGAGGCCACAAAAGAAGTAATAGAGCGGGAAGCGCCAGGGATGGCCCTGGCAATGCTGATGGGATCGCTCAATGTCACACCTCTGGGCATGCTCTCTAGACCAGTGTGTGGAATAAGGGGGAAAACTCTGATAATTAA…
>GPHN_51
CCACGACCATCAAATCCGTGTCGGAGTCCTCACAGTGAGTGATAGCTGCTTCAGGAATCTTGCAGAAGACCGCAGTGGGATAAATCTAAAAGATCTTGTCCAAGATCCTTCTTTGTTGGGTGGGACTATATCGGCATACAAGATAGTACCAGATGAAATAGAAGAAATCAAGGCCACAAAAGAAGTAATAGAGCGGGAAGCGCCAGGGATGGCCCTGGCAATGCTGATGGGATCGCTCAATGTCACACCTCTGGGCATGCTCTCTAGACCAGTGTGTGGAATAAGGGGGAAAACTCTGATAATTAACCTACCTGGTAGCAAGAAAGGATCTCAGGAATGCTTTCAGTTCATACTGCCAGCTCTACCTCATGCCATTGACCTTTTACGTGATGCCATTGT…
>GPHN_52
CCACGACCATCAAATCCGTGTCGGAGTCCTCACAGTGAGTGATAGCTGCTTCAGGAATCTTGCAGAAGACCGCAGTGGGATAAATCTAAAAGATCTTGTCCAAGATCCTTCTTTGTTGGGTGGGACTATATCGGCATACAAGATAGTACCAGATGAAATAGAAGAAATCAAGGTCACAGTGCTGTAGATATCACCAAGGTGGCTAGAAGACATCGCATGTCTCCTTTTCCCCTGACGTCTATGGACAAAGCCTTCATTACAGTCCTGGAGATGACTCCGGTGCTTGGTACAGAAATCATCAATTACCGAGATGGAATGGGGCGAGTCCTTGCTCAAGATGTATATGCAAAAGACAACCTACCCCCATTCCCTGCATCAGTAAAAGATGGCTATGCTGTT…
>GPHN_53
CCACGACCATCAAATCCGTGTCGGAGTCCTCACAGTGAGTGATAGCTGCTTCAGGAATCTTGCAGAAGACCGCAGTGGGATAAATCTAAAAGATCTTGTCCAAGATCCTTCTTTGTTGGGTGGGACTATATCGGCATACAAGATAGTACCAGATGAAATAGAAGAAATCAAGGAAACACTCATAGACTGGTGTGATGAAAAGGAACTTAATTTAATATTAACAACTGGAGGAACGGGGTTTGCACCACGAGATGTCACTCCAGAGAAATTCCCAACATTCCCATTTTGTGGGCTCCAGAAAGGGGCCACAAAAGAAGTAATAGAGCGGGAAGCGCCAGGGATGGCCCTGGCAATGCTGATGGGATCGCTCAATGTCACACCTCTGGGCATGCTCTCTAG…
>GPHN_54
CCACGACCATCAAATCCGTGTCGGAGTCCTCACAGCCAACTCAGACAGTAATGCCAGGACAAGTGATGCGGGTTACAACAGGTGCTCCAATCCCCTGCGGTGCTGATGCAGTAGTGCAAGTTGAAGATACTGAACTCATCAGGGAATCAGATGATGGTACTGAAGAACTTGAAGTACGAATTCTGGTGCAAGCTCGGCCAGGCCAAGATATCCGACCCATCGGCCATGACATTAAGAGAGGGGAGTGTGTTTTGGCCAAAGGAACCCATATGGGCCCTTCAGAGATTGGTCTCCTTGCAACTGTGGGTGTCACAGAAGTGGAAGTTAATAAGTTTCCAGTGGTTGCCGTTATGTCAACAGGGAATGAGCTGCTAAATCCTGAAGATGATCTCTTACCAG…
>GPHN_55
CCACGACCATCAAATCCGTGTCGGAGTCCTCACAGTGAGTGATAGCTGCTTCAGGAATCTTGCAGAAGACCGCAGTGGGATAAATCTAAAAGATCTTGTCCAAGATCCTTCTTTGTTGGGTGGGACTATATCGGCATACAAGATAGTACCAGATGAAATAGAAGAAATCAAGGAAACACTCATAGACTGGTGTGATGAAAAGGAACTTAATTTAATATTAACAACTGGAGGAACGGGGTTTGCACCACGAGATGTCACTCCAGAGGCCACAAAAGAAGTAATAGAGCGGGAAGCGCCAGGGATGGCCCTGGCAATGCTGATGGGATCGCTCAATGTCACACCTCTGGGCATGCTCTCTAGACCAGTGTGTGGAATAAGGGGGAAAACTCTGATAATTAA…
>GPHN_56
CCACGACCATCAAATCCGTGTCGGAGTCCTCACAGTGAGTGATAGCTGCTTCAGGAATCTTGCAGAAGACCGCAGTGGGATAAATCTAAAAGATCTTGTCCAAGATCCTTCTTTGTTGGGTGGGACTATATCGGCATACAAGATAGTACCAGATGAAATAGAAGAAATCAAGGCCACAAAAGAAGTAATAGAGCGGGAAGCGCCAGGGATGGCCCTGGCAATGCTGATGGGATCGCTCAATGTCACACCTCTGGGCATGCTCTCTAGACCAGTGTGTGGAATAAGGGGGAAAACTCTGATAATTAACCTACCTGGTAGCAAGAAAGGATCTCAGATTCCAGACTCCATCATTTCTCGTGGTGTTCAGGTGCTCCCACGAGACACAGCCTCCCTTAGCAC…
>GPHN_57
CCACGACCATCAAATCCGTGTCGGAGTCCTCACAGCCCACATAAACAGACAGAAGACAAAGGAGTTCAGTGTGAAGAAGAGGAAGAAGAAAAGAAAGACAGTGGTGTAGCTTCAACAGAAGATAGTTCCTCATCACATATAACTGCAGCAGCTCTTGCTGCAAAGAAGCATCCATTCTACACCAGTCCTGCTCTTTTCATGGCAAATCATGGGCAGCCCATCCCTGGTCTCATCAGTTATTCCCATCATGCAACAGGCAGTGCAGATAAACGGATTCCAGACTCCATCATTTCTCGTGGTGTTCAGGTGCTCCCACGAGACACAGCCTCCCTTAGCACTACTCCTTCAGAATCGCCCCGTGCTCAGGCTACATCTCGCCTCTCTACAGCTTCTTGTCCA…
>GPHN_58
CCACGACCATCAAATCCGTGTCGGAGTCCTCACAGTGAGTGATAGCTGCTTCAGGAATCTTGCAGAAGACCGCAGTGGGATAAATCTAAAAGATCTTGTCCAAGATCCTTCTTTGTTGGGTGGGACTATATCGGCATACAAGATAGTACCAGATGAAATAGAAGAAATCAAGGAAACACTCATAGACTGGTGTGATGAAAAGGAACTTAATTTAATATTAACAACTGGAGGAACGGGGTTTGCACCACGAGATGTCACTCCAGAGGCCACAAAAGAAGTAATAGAGCGGGAAGCGCCAGGGATGGCCCTGGCAATGCTGATGGGATCGCTCAATGTCACACCTCTGGGCATGCTCTCTAGACCAGTGTGTGGAATAAGGGGGAAAACTCTGATAATTAA…
>GPHN_59
CCACGACCATCAAATCCGTGTCGGAGTCCTCACAGTGAGTGATAGCTGCTTCAGGAATCTTGCAGAAGACCGCAGTGGGATAAATCTAAAAGATCTTGTCCAAGATCCTTCTTTGTTGGGTGGGACTATATCGGCATACAAGATAGTACCAGATGAAATAGAAGAAATCAAGAAATTCCCAACATTCCCATTTTGTGGGCTCCAGAAAGGGGCCACAAAAGAAGTAATAGAGCGGGAAGCGCCAGGGATGGCCCTGGCAATGCTGATGGGATCGCTCAATGTCACACCTCTGGGCATGCTCTCTAGACCAGTGTGTGGAATAAGGGGGAAAACTCTGATAATTAACCTACCTGGTAGCAAGAAAGGATCTCAGGAATGCTTTCAGTTCATACTGCCAGC…
>GPHN_60
CCACGACCATCAAATCCGTGTCGGAGTCCTCACAGTGAGTGATAGCTGCTTCAGGAATCTTGCAGAAGACCGCAGTGGGATAAATCTAAAAGATCTTGTCCAAGATCCTTCTTTGTTGGGTGGGACTATATCGGCATACAAGATAGTACCAGATGAAATAGAAGAAATCAAGGAAACACTCATAGACTGGTGTGATGAAAAGGAACTTAATTTAATATTAACAACTGGAGGAACGGGGTTTGCACCACGAGATGTCACTCCAGAGAAATTCCCAACATTCCCATTTTGTGGGCTCCAGAAAGGGGCCACAAAAGAAGTAATAGAGCGGGAAGCGCCAGGGATGGCCCTGGCAATGCTGATGGGATCGCTCAATGTCACACCTCTGGGCATGCTCTCTAG…
>GPHN_61
CCACGACCATCAAATCCGTGTCGGAGTCCTCACAGTGAGTGATAGCTGCTTCAGGAATCTTGCAGAAGACCGCAGTGGGATAAATCTAAAAGATCTTGTCCAAGATCCTTCTTTGTTGGGTGGGACTATATCGGCATACAAGATAGTACCAGATGAAATAGAAGAAATCAAGGAAACACTCATAGACTGGTGTGATGAAAAGGAACTTAATTTAATATTAACAACTGGAGGAACGGGGTTTGCACCACGAGATGTCACTCCAGAGAAATTCCCAACATTCCCATTTTGTGGGCTCCAGAAAGGGGCCACAAAAGAAGTAATAGAGCGGGAAGCGCCAGGGATGGCCCTGGCAATGCTGATGGGATCGCTCAATGTCACACCTCTGGGCATGCTCTCTAG…
>GPHN_62
CCACGACCATCAAATCCGTGTCGGAGTCCTCACAGTGAGTGATAGCTGCTTCAGGAATCTTGCAGAAGACCGCAGTGGGATAAATCTAAAAGATCTTGTCCAAGATCCTTCTTTGTTGGGTGGGACTATATCGGCATACAAGATAGTACCAGATGAAATAGAAGAAATCAAGGAAACACTCATAGACTGGTGTGATGAAAAGGAACTTAATTTAATATTAACAACTGGAGGAACGGGGTTTGCACCACGAGATGTCACTCCAGAGACCAGTGTGTGGAATAAGGGGGAAAACTCTGATAATTAACCTACCTGGTAGCAAGAAAGGATCTCAGGAATGCTTTCAGTTCATACTGCCAGCTCTACCTCATGCCATTGACCTTTTACGTGATGCCATTGTAA…
>GPHN_63
CCACGACCATCAAATCCGTGTCGGAGTCCTCACAGTGAGTGATAGCTGCTTCAGGAATCTTGCAGAAGACCGCAGTGGGATAAATCTAAAAGATCTTGTCCAAGATCCTTCTTTGTTGGGTGGGACTATATCGGCATACAAGATAGTACCAGATGAAATAGAAGAAATCAAGGAAACACTCATAGACTGGTGTGATGAAAAGGAACTTAATTTAATATTAACAACTGGAGGAACGGGGTTTGCACCACGAGATGTCACTCCAGAGGCCACAAAAGAAGTAATAGAGCGGGAAGCGCCAGGGATGGCCCTGGCAATGCTGATGGGATCGCTCAATGTCACACCTCTGGGCATGCTCTCTAGACCAGTGTGTGGAATAAGGGGGAAAACTCTGATAATTAA…
>GPHN_64
CCACGACCATCAAATCCGTGTCGGAGTCCTCACAGTGAGTGATAGCTGCTTCAGGAATCTTGCAGAAGACCGCAGTGGGATAAATCTAAAAGATCTTGTCCAAGATCCTTCTTTGTTGGGTGGGACTATATCGGCATACAAGATAGTACCAGATGAAATAGAAGAAATCAAGGAAACACTCATAGACTGGTGTGATGAAAAGGAACTTAATTTAATATTAACAACTGGAGGAACGGGGTTTGCACCACGAGATGTCACTCCAGAGGCCACAAAAGAAGTAATAGAGCGGGAAGCGCCAGGGATGGCCCTGGCAATGCTGATGGGATCGCTCAATGTCACACCTCTGGGCATGCTCTCTAGACCAGTGTGTGGAATAAGGGGGAAAACTCTGATAATTAA…
>GPHN_65
CCACGACCATCAAATCCGTGTCGGAGTCCTCACAGTGAGTGATAGCTGCTTCAGGAATCTTGCAGAAGACCGCAGTGGGATAAATCTAAAAGATCTTGTCCAAGATCCTTCTTTGTTGGGTGGGACTATATCGGCATACAAGATAGTACCAGATGAAATAGAAGAAATCAAGGAAACACTCATAGACTGGTGTGATGAAAAGGAACTTAATTTAATATTAACAACTGGAGGAACGGGGTTTGCACCACGAGATGTCACTCCAGAGGCCACAAAAGAAGTAATAGAGCGGGAAGCGCCAGGGATGGCCCTGGCAATGCTGATGGGATCGCTCAATGTCACACCTCTGGGCATGCTCTCTAGACCAGTGTGTGGAATAAGGGGGAAAACTCTGATAATTAA…
>GPHN_66
CCACGACCATCAAATCCGTGTCGGAGTCCTCACAGACCAGTGTGTGGAATAAGGGGGAAAACTCTGATAATTAACCTACCTGGTAGCAAGAAAGGATCTCAGGAATGCTTTCAGTTCATACTGCCAGCTCTACCTCATGCCATTGACCTTTTACGTGATGCCATTGTAAAAGTAAAGGAGGTGCATGATGAACTTGAAGATTTACCTTCCCCACCACCTCCTCTCTCTCCACCTCCTACAACTAGCCCACATAAACAGACAGAAGACAAAGGAGTTCAGTGTGAAGAAGAGGAAGAAGAAAAGAAAGACAGTGGTGTAGCTTCAACAGAAGATAGTTCCTCATCACATATAACTGCAGCAGCTCTTGCTGCAAAGATTCCAGACTCCATCATTTCTCGT…
>GPHN_67
CCACGACCATCAAATCCGTGTCGGAGTCCTCACAGTGAGTGATAGCTGCTTCAGGAATCTTGCAGAAGACCGCAGTGGGATAAATCTAAAAGATCTTGTCCAAGATCCTTCTTTGTTGGGTGGGACTATATCGGCATACAAGATAGTACCAGATGAAATAGAAGAAATCAAGGAAACACTCATAGACTGGTGTGATGAAAAGGAACTTAATTTAATATTAACAACTGGAGGAACGGGGTTTGCACCACGAGATGTCACTCCAGAGGCCACAAAAGAAGTAATAGAGCGGGAAGCGCCAGGGATGGCCCTGGCAATGCTGATGGGATCGCTCAATGTCACACCTCTGGGCATGCTCTCTAGACCAGTGTGTGGAATAAGGGGGAAAACTCTGATAATTAA…
>GPHN_68
CCACGACCATCAAATCCGTGTCGGAGTCCTCACAGTGAGTGATAGCTGCTTCAGGAATCTTGCAGAAGACCGCAGTGGGATAAATCTAAAAGATCTTGTCCAAGATCCTTCTTTGTTGGGTGGGACTATATCGGCATACAAGATAGTACCAGATGAAATAGAAGAAATCAAGGAAACACTCATAGACTGGTGTGATGAAAAGGAACTTAATTTAATATTAACAACTGGAGGAACGGGGTTTGCACCACGAGATGTCACTCCAGAGAAATTCCCAACATTCCCATTTTGTGGGCTCCAGAAAGGGGCCACAAAAGAAGTAATAGAGCGGGAAGCGCCAGGGATGGCCCTGGCAATGCTGATGGGATCGCTCAATGTCACACCTCTGGGCATGCTCTCTAG…
>GPHN_69
CCACGACCATCAAATCCGTGTCGGAGTCCTCACAGTGAGTGATAGCTGCTTCAGGAATCTTGCAGAAGACCGCAGTGGGATAAATCTAAAAGATCTTGTCCAAGATCCTTCTTTGTTGGGTGGGACTATATCGGCATACAAGATAGTACCAGATGAAATAGAAGAAATCAAGGAAACACTCATAGACTGGTGTGATGAAAAGGAACTTAATTTAATATTAACAACTGGAGGAACGGGGTTTGCACCACGAGATGTCACTCCAGAGGCCACAAAAGAAGTAATAGAGCGGGAAGCGCCAGGGATGGCCCTGGCAATGCTGATGGGATCGCTCAATGTCACACCTCTGGGCATGCTCTCTAGACCAGTGTGTGGAATAAGGGGGAAAACTCTGATAATTAA…
>GPHN_70
CCACGACCATCAAATCCGTGTCGGAGTCCTCACAGTGAGTGATAGCTGCTTCAGGAATCTTGCAGAAGACCGCAGTGGGATAAATCTAAAAGATCTTGTCCAAGATCCTTCTTTGTTGGGTGGGACTATATCGGCATACAAGATAGTACCAGATGAAATAGAAGAAATCAAGGAAACACTCATAGACTGGTGTGATGAAAAGGAACTTAATTTAATATTAACAACTGGAGGAACGGGGTTTGCACCACGAGATGTCACTCCAGAGAAATTCCCAACATTCCCATTTTGTGGGCTCCAGAAAGGGATTCCAGACTCCATCATTTCTCGTGGTGTTCAGGTGCTCCCACGAGACACAGCCTCCCTTAGCACTACTCCTTCAGAATCGCCCCGTGCTCAGGC…
>GPHN_71
CCACGACCATCAAATCCGTGTCGGAGTCCTCACAGTGAGTGATAGCTGCTTCAGGAATCTTGCAGAAGACCGCAGTGGGATAAATCTAAAAGATCTTGTCCAAGATCCTTCTTTGTTGGGTGGGACTATATCGGCATACAAGATAGTACCAGATGAAATAGAAGAAATCAAGGAAACACTCATAGACTGGTGTGATGAAAAGGAACTTAATTTAATATTAACAACTGGAGGAACGGGGTTTGCACCACGAGATGTCACTCCAGAGAAATTCCCAACATTCCCATTTTGTGGGCTCCAGAAAGGGGCCACAAAAGAAGTAATAGAGCGGGAAGCGCCAGGGATGGCCCTGGCAATGCTGATGGGATCGCTCAATGTCACACCTCTGGGCATGCTCTCTAG…
>GPHN_72
CCACGACCATCAAATCCGTGTCGGAGTCCTCACAGTGAGTGATAGCTGCTTCAGGAATCTTGCAGAAGACCGCAGTGGGATAAATCTAAAAGATCTTGTCCAAGATCCTTCTTTGTTGGGTGGGACTATATCGGCATACAAGATAGTACCAGATGAAATAGAAGAAATCAAGGAAACACTCATAGACTGGTGTGATGAAAAGGAACTTAATTTAATATTAACAACTGGAGGAACGGGGTTTGCACCACGAGATGTCACTCCAGAGAAATTCCCAACATTCCCATTTTGTGGGCTCCAGAAAGGGGCCACAAAAGAAGTAATAGAGCGGGAAGCGCCAGGGATGGCCCTGGCAATGCTGATGGGATCGCTCAATGTCACACCTCTGGGCATGCTCTCTAG…
>GPHN_73
CCACGACCATCAAATCCGTGTCGGAGTCCTCACAGTGAGTGATAGCTGCTTCAGGAATCTTGCAGAAGACCGCAGTGGGATAAATCTAAAAGATCTTGTCCAAGATCCTTCTTTGTTGGGTGGGACTATATCGGCATACAAGATAGTACCAGATGAAATAGAAGAAATCAAGGAAACACTCATAGACTGGTGTGATGAAAAGGAACTTAATTTAATATTAACAACTGGAGGAACGGGGTTTGCACCACGAGATGTCACTCCAGAGAAATTCCCAACATTCCCATTTTGTGGGCTCCAGAAAGGGCTCCACTCTAGATTGGAAGGGCTTAAAGATGAACTCTGGAGGAATAGAGGCTACGACTTAAGAGTCCAGTCCAGGTGCAGCAGCAAGGAGAACAT…
>GPHN_74
CCACGACCATCAAATCCGTGTCGGAGTCCTCACAGTGAGTGATAGCTGCTTCAGGAATCTTGCAGAAGACCGCAGTGGGATAAATCTAAAAGATCTTGTCCAAGATCCTTCTTTGTTGGGTGGGACTATATCGGCATACAAGATAGTACCAGATGAAATAGAAGAAATCAAGGAAACACTCATAGACTGGTGTGATGAAAAGGAACTTAATTTAATATTAACAACTGGAGGAACGGGGTTTGCACCACGAGATGTCACTCCAGAGGCCACAAAAGAAGTAATAGAGCGGGAAGCGCCAGGGATGGCCCTGGCAATGCTGATGGGATCGCTCAATGTCACACCTCTGGGCATGCTCTCTAGACCAGTGTGTGGAATAAGGGGGAAAACTCTGATAATTAA…
>GPHN_75
CCACGACCATCAAATCCGTGTCGGAGTCCTCACAGTGAGTGATAGCTGCTTCAGGAATCTTGCAGAAGACCGCAGTGGGATAAATCTAAAAGATCTTGTCCAAGATCCTTCTTTGTTGGGTGGGACTATATCGGCATACAAGATAGTACCAGATGAAATAGAAGAAATCAAGGAAACACTCATAGACTGGTGTGATGAAAAGGAACTTAATTTAATATTAACAACTGGAGGAACGGGGTTTGCACCACGAGATGTCACTCCAGAGAAATTCCCAACATTCCCATTTTGTGGGCTCCAGAAAGGGGCCACAAAAGAAGTAATAGAGCGGGAAGCGCCAGGGATGGCCCTGGCAATGCTGATGGGATCGCTCAATGTCACACCTCTGGGCATGCTCTCTAG…
>GPHN_76
CCACGACCATCAAATCCGTGTCGGAGTCCTCACAGTGAGTGATAGCTGCTTCAGGAATCTTGCAGAAGACCGCAGTGGGATAAATCTAAAAGATCTTGTCCAAGATCCTTCTTTGTTGGGTGGGACTATATCGGCATACAAGATAGTACCAGATGAAATAGAAGAAATCAAGGAAACACTCATAGACTGGTGTGATGAAAAGGAACTTAATTTAATATTAACAACTGGAGGAACGGGGTTTGCACCACGAGATGTCACTCCAGAGAAATTCCCAACATTCCCATTTTGTGGGCTCCAGAAAGGGGCCACAAAAGAAGTAATAGAGCGGGAAGCGCCAGGGATGGCCCTGGCAATGCTGATGGGATCGCTCAATGTCACACCTCTGGGCATGCTCTCTAG…
>GPHN_77
CCACGACCATCAAATCCGTGTCGGAGTCCTCACAGTGAGTGATAGCTGCTTCAGGAATCTTGCAGAAGACCGCAGTGGGATAAATCTAAAAGATCTTGTCCAAGATCCTTCTTTGTTGGGTGGGACTATATCGGCATACAAGATAGTACCAGATGAAATAGAAGAAATCAAGGAAACACTCATAGACTGGTGTGATGAAAAGGAACTTAATTTAATATTAACAACTGGAGGAACGGGGTTTGCACCACGAGATGTCACTCCAGAGGCCACAAAAGAAGTAATAGAGCGGGAAGCGCCAGGGATGGCCCTGGCAATGCTGATGGGATCGCTCAATGTCACACCTCTGGGCATGCTCTCTAGACCAGTGTGTGGAATAAGGGGGAAAACTCTGATAATTAA…
>GPHN_78
CCACGACCATCAAATCCGTGTCGGAGTCCTCACAGTGAGTGATAGCTGCTTCAGGAATCTTGCAGAAGACCGCAGTGGGATAAATCTAAAAGATCTTGTCCAAGATCCTTCTTTGTTGGGTGGGACTATATCGGCATACAAGATAGTACCAGATGAAATAGAAGAAATCAAGGCCACAAAAGAAGTAATAGAGCGGGAAGCGCCAGGGATGGCCCTGGCAATGCTGATGGGATCGCTCAATGTCACACCTCTGGGCATGCTCTCTAGACCAGTGTGTGGAATAAGGGGGAAAACTCTGATAATTAACCTACCTGGTAGCAAGAAAGGATCTCAGGAATGCTTTCAGTTCATACTGCCAGCTCTACCTCATGCCATTGACCTTTTACGTGATGCCATTGT…
>GPHN_79
CCACGACCATCAAATCCGTGTCGGAGTCCTCACAGTGAGTGATAGCTGCTTCAGGAATCTTGCAGAAGACCGCAGTGGGATAAATCTAAAAGATCTTGTCCAAGATCCTTCTTTGCCACAAAAGAAGTAATAGAGCGGGAAGCGCCAGGGATGGCCCTGGCAATGCTGATGGGATCGCTCAATGTCACACCTCTGGGCATGCTCTCTAGACCAGTGTGTGGAATAAGGGGGAAAACTCTGATAATTAACCTACCTGGTAGCAAGAAAGGATCTCAGGAATGCTTTCAGTTCATACTGCCAGCTCTACCTCATGCCATTGACCTTTTACGTGATGCCATTGTAAAAGTAAAGGAGGTGCATGATGAACTTGAAGATTTACCTTCCCCACCACCTCCTCTC…
>GPHN_80
CCACGACCATCAAATCCGTGTCGGAGTCCTCACAGTGAGTGATAGCTGCTTCAGGAATCTTGCAGAAGACCGCAGTGGGATAAATCTAAAAGATCTTGTCCAAGATCCTTCTTTGTTGGGTGGGACTATATCGGCATACAAGATAGTACCAGATGAAATAGAAGAAATCAAGGAAACACTCATAGACTGGTGTGATGAAAAGGAACTTAATTTAATATTAACAACTGGAGGAACGGGGTTTGCACCACGAGATGTCACTCCAGAGGCCACAAAAGAAGTAATAGAGCGGGAAGCGCCAGGGATGGCCCTGGCAATGCTGATGGGATCGCTCAATGTCACACCTCTGGGCATGCTCTCTAGACCAGTGTGTGGAATAAGGGGGAAAACTCTGATAATTAA…
>GPHN_81
CCACGACCATCAAATCCGTGTCGGAGTCCTCACAGTGAGTGATAGCTGCTTCAGGAATCTTGCAGAAGACCGCAGTGGGATAAATCTAAAAGATCTTGTCCAAGATCCTTCTTTGTTGGGTGGGACTATATCGGCATACAAGATAGTACCAGATGAAATAGAAGAAATCAAGGAAACACTCATAGACTGGTGTGATGAAAAGGAACTTAATTTAATATTAACAACTGGAGGAACGGGGTTTGCACCACGAGATGTCACTCCAGAGAAATTCCCAACATTCCCATTTTGTGGGCTCCAGAAAGGGGCCACAAAAGAAGTAATAGAGCGGGAAGCGCCAGGGATGGCCCTGGCAATGCTGATGGGATCGCTCAATGTCACACCTCTGGGCATGCTCTCTAG…
>GPHN_82
CCACGACCATCAAATCCGTGTCGGAGTCCTCACAGTGAGTGATAGCTGCTTCAGGAATCTTGCAGAAGACCGCAGTGGGATAAATCTAAAAGATCTTGTCCAAGATCCTTCTTTGTTGGGTGGGACTATATCGGCATACAAGATAGTACCAGATGAAATAGAAGAAATCAAGGAAACACTCATAGACTGGTGTGATGAAAAGGAACTTAATTTAATATTAACAACTGGAGGAACGGGGTTTGCACCACGAGATGTCACTCCAGAGGCCACAAAAGAAGTAATAGAGCGGGAAGCGCCAGGGATGGCCCTGGCAATGCTGATGGGATCGCTCAATGTCACACCTCTGGGCATGCTCTCTAGACCAGTGTGTGGAATAAGGGGGAAAACTCTGATAATTAA…
>GPHN_83
CCACGACCATCAAATCCGTGTCGGAGTCCTCACAGTGAGTGATAGCTGCTTCAGGAATCTTGCAGAAGACCGCAGTGGGATAAATCTAAAAGATCTTGTCCAAGATCCTTCTTTGTTGGGTGGGACTATATCGGCATACAAGATAGTACCAGATGAAATAGAAGAAATCAAGGAAACACTCATAGACTGGTGTGATGAAAAGGAACTTAATTTAATATTAACAACTGGAGGAACGGGGTTTGCACCACGAGATGTCACTCCAGAGGCCACAAAAGAAGTAATAGAGCGGGAAGCGCCAGGGATGGCCCTGGCAATGCTGATGGGATCGCTCAATGTCACACCTCTGGGCATGCTCTCTAGACCAGTGTGTGGAATAAGGGGGAAAACTCTGATAATTAA…
>GPHN_84
CCACGACCATCAAATCCGTGTCGGAGTCCTCACAGTGAGTGATAGCTGCTTCAGGAATCTTGCAGAAGACCGCAGTGGGATAAATCTAAAAGATCTTGTCCAAGATCCTTCTTTGTTGGGTGGGACTATATCGGCATACAAGATAGTACCAGATGAAATAGAAGAAATCAAGGAAACACTCATAGACTGGTGTGATGAAAAGGAACTTAATTTAATATTAACAACTGGAGGAACGGGGTTTGCACCACGAGATGTCACTCCAGAGCCAACTCAGACAGTAATGCCAGGACAAGTGATGCGGGTTACAACAGGTGCTCCAATCCCCTGCGGTGCTGATGCAGTAGTGCAAGTTGAAGATACTGAACTCATCAGGGAATCAGATGATGGTACTGAAGAACT…
>GPHN_85
CCACGACCATCAAATCCGTGTCGGAGTCCTCACAGTGAGTGATAGCTGCTTCAGGAATCTTGCAGAAGACCGCAGTGGGATAAATCTAAAAGATCTTGTCCAAGATCCTTCTTTGTTGGGTGGGACTATATCGGCATACAAGATAGTACCAGATGAAATAGAAGAAATCAAGGAAACACTCATAGACTGGTGTGATGAAAAGGAACTTAATTTAATATTAACAACTGGAGGAACGGGGTTTGCACCACGAGATGTCACTCCAGAGAAATTCCCAACATTCCCATTTTGTGGGCTCCAGAAAGGGACCAGTGTGTGGAATAAGGGGGAAAACTCTGATAATTAACCTACCTGGTAGCAAGAAAGGATCTCAGGAATGCTTTCAGTTCATACTGCCAGCTC…
>GPHN_86
CCACGACCATCAAATCCGTGTCGGAGTCCTCACAGTGAGTGATAGCTGCTTCAGGAATCTTGCAGAAGACCGCAGTGGGATAAATCTAAAAGATCTTGTCCAAGATCCTTCTTTGTTGGGTGGGACTATATCGGCATACAAGATAGTACCAGATGAAATAGAAGAAATCAAGGAAACACTCATAGACTGGTGTGATGAAAAGGAACTTAATTTAATATTAACAACTGGAGGAACGGGGTTTGCACCACGAGATGTCACTCCAGAGGCCACAAAAGAAGTAATAGAGCGGGAAGCGCCAGGGATGGCCCTGGCAATGCTGATGGGATCGCTCAATGTCACACCTCTGGGCATGCTCTCTAGACCAGTGTGTGGAATAAGGGGGAAAACTCTGATAATTAA…
>GPHN_87
CCACGACCATCAAATCCGTGTCGGAGTCCTCACAGTGAGTGATAGCTGCTTCAGGAATCTTGCAGAAGACCGCAGTGGGATAAATCTAAAAGATCTTGTCCAAGATCCTTCTTTGTTGGGTGGGACTATATCGGCATACAAGATAGTACCAGATGAAATAGAAGAAATCAAGGAAACACTCATAGACTGGTGTGATGAAAAGGAACTTAATTTAATATTAACAACTGGAGGAACGGGGTTTGCACCACGAGATGTCACTCCAGAGGCCACAAAAGAAGTAATAGAGCGGGAAGCGCCAGGGATGGCCCTGGCAATGCTGATGGGATCGCTCAATGTCACACCTCTGGGCATGCTCTCTAGACCAGTGTGTGGAATAAGGGGGAAAACTCTGATAATTAA…
>GPHN_88
CCACGACCATCAAATCCGTGTCGGAGTCCTCACAGCTGCTAAATCCTGAAGATGATCTCTTACCAGGAAAGATTCGGGACAGCAATCGATCAACACTTCTAGCAACAATTCAGGAACATGGTTACCCAACAATCAACCTGGGAATTGTAGGAGACAACCCAGATGACTTACTCAATGCCTTGAATGAGGGTATCAGCCGTGCTGATGTCATCATCACGTCAGGAGGTGTGTCCATGGGGGAAAAGGACTATCTCAAGCAGGTGCTGGACATTGATCTTCATGCTCAGATCCATTTTGGCAGAGTTTTTATGAAGCCAGGCTTGCCAACAACATTTGCAACTTTGGATATTGATGGTGTAAGAAAAATTATTTTTGCACTACCAGGGAATCCTGTATCAG…
>GPHN_89
CCACGACCATCAAATCCGTGTCGGAGTCCTCACAGTGAGTGATAGCTGCTTCAGGAATCTTGCAGAAGACCGCAGTGGGATAAATCTAAAAGATCTTGTCCAAGATCCTTCTTTGTTGGGTGGGACTATATCGGCATACAAGATAGTACCAGATGAAATAGAAGAAATCAAGGAAACACTCATAGACTGGTGTGATGAAAAGGAACTTAATTTAATATTAACAACTGGAGGAACGGGGTTTGCACCACGAGATGTCACTCCAGAGGCCACAAAAGAAGTAATAGAGCGGGAAGCGCCAGGGATGGCCCTGGCAATGCTGATGGGATCGCTCAATGTCACACCTCTGGGCATGCTCTCTAGACCAGTGTGTGGAATAAGGGGGAAAACTCTGATAATTAA…
>GPHN_90
CCACGACCATCAAATCCGTGTCGGAGTCCTCACAGTGAGTGATAGCTGCTTCAGGAATCTTGCAGAAGACCGCAGTGGGATAAATCTAAAAGATCTTGTCCAAGATCCTTCTTTGTTGGGTGGGACTATATCGGCATACAAGATAGTACCAGATGAAATAGAAGAAATCAAGGAAACACTCATAGACTGGTGTGATGAAAAGGAACTTAATTTAATATTAACAACTGGAGGAACGGGGTTTGCACCACGAGATGTCACTCCAGAGAAATTCCCAACATTCCCATTTTGTGGGCTCCAGAAAGGGACCAGTGTGTGGAATAAGGGGGAAAACTCTGATAATTAACCTACCTGGTAGCAAGAAAGGATCTCAGATTCCAGACTCCATCATTTCTCGTGGTG…
>GPHN_91
CCACGACCATCAAATCCGTGTCGGAGTCCTCACAGTGAGTGATAGCTGCTTCAGGAATCTTGCAGAAGACCGCAGTGGGATAAATCTAAAAGATCTTGTCCAAGATCCTTCTTTGTTGGGTGGGACTATATCGGCATACAAGATAGTACCAGATGAAATAGAAGAAATCAAGGAAACACTCATAGACTGGTGTGATGAAAAGGAACTTAATTTAATATTAACAACTGGAGGAACGGGGTTTGCACCACGAGATGTCACTCCAGAGGCCACAAAAGAAGTAATAGAGCGGGAAGCGCCAGGGATGGCCCTGGCAATGCTGATGGGATCGCTCAATGTCACACCTCTGGGCATGCTCTCTAGACCAGTGTGTGGAATAAGGGGGAAAACTCTGATAATTAA…
>GPHN_92
CCACGACCATCAAATCCGTGTCGGAGTCCTCACAGTGAGTGATAGCTGCTTCAGGAATCTTGCAGAAGACCGCAGTGGGATAAATCTAAAAGATCTTGTCCAAGATCCTTCTTTGTTGGGTGGGACTATATCGGCATACAAGATAGTACCAGATGAAATAGAAGAAATCAAGGAAACACTCATAGACTGGTGTGATGAAAAGGAACTTAATTTAATATTAACAACTGGAGGAACGGGGTTTGCACCACGAGATGTCACTCCAGAGGCCACAAAAGAAGTAATAGAGCGGGAAGCGCCAGGGATGGCCCTGGCAATGCTGATGGGATCGCTCAATGTCACACCTCTGGGCATGCTCTCTAGACCAGTGTGTGGAATAAGGGGGAAAACTCTGATAATTAA…
>GPHN_93
CCACGACCATCAAATCCGTGTCGGAGTCCTCACAGTGAGTGATAGCTGCTTCAGGAATCTTGCAGAAGACCGCAGTGGGATAAATCTAAAAGATCTTGTCCAAGATCCTTCTTTGTTGGGTGGGACTATATCGGCATACAAGATAGTACCAGATGAAATAGAAGAAATCAAGGAAACACTCATAGACTGGTGTGATGAAAAGGAACTTAATTTAATATTAACAACTGGAGGAACGGGGTTTGCACCACGAGATGTCACTCCAGAGGCCACAAAAGAAGTAATAGAGCGGGAAGCGCCAGGGATGGCCCTGGCAATGCTGATGGGATCGCTCAATGTCACACCTCTGGGCATGCTCTCTAGACCAGTGTGTGGAATAAGGGGGAAAACTCTGATAATTAA…
>GPHN_94
CCACGACCATCAAATCCGTGTCGGAGTCCTCACAGGTTGGGTGGGACTATATCGGCATACAAGATAGTACCAGATGAAATAGAAGAAATCAAGGAAACACTCATAGACTGGTGTGATGAAAAGGAACTTAATTTAATATTAACAACTGGAGGAACGGGGTTTGCACCACGAGATGTCACTCCAGAGGCCACAAAAGAAGTAATAGAGCGGGAAGCGCCAGGGATGGCCCTGGCAATGCTGATGGGATCGCTCAATGTCACACCTCTGGGCATGCTCTCTAGACCAGTGTGTGGAATAAGGGGGAAAACTCTGATAATTAACCTACCTGGTAGCAAGAAAGGATCTCAGATTCCAGACTCCATCATTTCTCGTGGTGTTCAGGTGCTCCCACGAGACACA…
>GPHN_95
CCACGACCATCAAATCCGTGTCGGAGTCCTCACAGGCCACAAAAGAAGTAATAGAGCGGGAAGCGCCAGGGATGGCCCTGGCAATGCTGATGGGATCGCTCAATGTCACACCTCTGGGCATGCTCTCTAGACCAGTGTGTGGAATAAGGGGGAAAACTCTGATAATTAACCTACCTGGTAGCAAGAAAGGATCTCAGGAATGCTTTCAGTTCATACTGCCAGCTCTACCTCATGCCATTGACCTTTTACGTGATGCCATTGTAAAAGTAAAGGAGGTGCATGATGAACTTGAAGATTTACCTTCCCCACCACCTCCTCTCTCTCCACCTCCTACAACTAGCCCACATAAACAGACAGAAGACAAAGGAGTTCAGTGTGAAGAAGAGGAAGAAGAAAAGA…
>GPHN_96
CCACGACCATCAAATCCGTGTCGGAGTCCTCACAGGCCACAAAAGAAGTAATAGAGCGGGAAGCGCCAGGGATGGCCCTGGCAATGCTGATGGGATCGCTCAATGTCACACCTCTGGGCATGCTCTCTAGACCAGTGTGTGGAATAAGGGGGAAAACTCTGATAATTAACCTACCTGGTAGCAAGAAAGGATCTCAGATTCCAGACTCCATCATTTCTCGTGGTGTTCAGGTGCTCCCACGAGACACAGCCTCCCTTAGCACTACTCCTTCAGAATCGCCCCGTGCTCAGGCTACATCTCGCCTCTCTACAGCTTCTTGTCCAACACCAAAAGTCCAGTCCAGGTGCAGCAGCAAGGAGAACATTCTAAGAGCCAGTCACAGTGCTGTAGATATCACCA…
>GPHN_97
CCACGACCATCAAATCCGTGTCGGAGTCCTCACAGTGAGTGATAGCTGCTTCAGGAATCTTGCAGAAGACCGCAGTGGGATAAATCTAAAAGATCTTGTCCAAGATCCTTCTTTGTTGGGTGGGACTATATCGGCATACAAGATAGTACCAGATGAAATAGAAGAAATCAAGGAAACACTCATAGACTGGTGTGATGAAAAGGAACTTAATTTAATATTAACAACTGGAGGAACGGGGTTTGCACCACGAGATGTCACTCCAGAGGCCACAAAAGAAGTAATAGAGCGGGAAGCGCCAGGGATGGCCCTGGCAATGCTGATGGGATCGCTCAATGTCACACCTCTGGGCATGCTCTCTAGACCAGTGTGTGGAATAAGGGGGAAAACTCTGATAATTAA…
>GPHN_98
CCACGACCATCAAATCCGTGTCGGAGTCCTCACAGTGAGTGATAGCTGCTTCAGGAATCTTGCAGAAGACCGCAGTGGGATAAATCTAAAAGATCTTGTCCAAGATCCTTCTTTGTTGGGTGGGACTATATCGGCATACAAGATAGTACCAGATGAAATAGAAGAAATCAAGGAAACACTCATAGACTGGTGTGATGAAAAGGAACTTAATTTAATATTAACAACTGGAGGAACGGGGTTTGCACCACGAGATGTCACTCCAGAGAAATTCCCAACATTCCCATTTTGTGGGCTCCAGAAAGGGGCCACAAAAGAAGTAATAGAGCGGGAAGCGCCAGGGATGGCCCTGGCAATGCTGATGGGATCGCTCAATGTCACACCTCTGGGCATGCTCTCTAG…
>GPHN_99
CCACGACCATCAAATCCGTGTCGGAGTCCTCACAGTGAGTGATAGCTGCTTCAGGAATCTTGCAGAAGACCGCAGTGGGATAAATCTAAAAGATCTTGTCCAAGATCCTTCTTTGTTGGGTGGGACTATATCGGCATACAAGATAGTACCAGATGAAATAGAAGAAATCAAGGAAACACTCATAGACTGGTGTGATGAAAAGGAACTTAATTTAATATTAACAACTGGAGGAACGGGGTTTGCACCACGAGATGTCACTCCAGAGAAATTCCCAACATTCCCATTTTGTGGGCTCCAGAAAGGGGCCACAAAAGAAGTAATAGAGCGGGAAGCGCCAGGGATGGCCCTGGCAATGCTGATGGGATCGCTCAATGTCACACCTCTGGGCATGCTCTCTAG…
>GPHN_100
CCACGACCATCAAATCCGTGTCGGAGTCCTCACAGTGAGTGATAGCTGCTTCAGGAATCTTGCAGAAGACCGCAGTGGGATAAATCTAAAAGATCTTGTCCAAGATCCTTCTTTGTTGGGTGGGACTATATCGGCATACAAGATAGTACCAGATGAAATAGAAGAAATCAAGGAAACACTCATAGACTGGTGTGATGAAAAGGAACTTAATTTAATATTAACAACTGGAGGAACGGGGTTTGCACCACGAGATGTCACTCCAGAGAAATTCCCAACATTCCCATTTTGTGGGCTCCAGAAAGGGGCCACAAAAGAAGTAATAGAGCGGGAAGCGCCAGGGATGGCCCTGGCAATGCTGATGGGATCGCTCAATGTCACACCTCTGGGCATGCTCTCTAG…
>GPHN_101
CCACGACCATCAAATCCGTGTCGGAGTCCTCACAGTGAGTGATAGCTGCTTCAGGAATCTTGCAGAAGACCGCAGTGGGATAAATCTAAAAGATCTTGTCCAAGATCCTTCTTTGTTGGGTGGGACTATATCGGCATACAAGATAGTACCAGATGAAATAGAAGAAATCAAGGAAACACTCATAGACTGGTGTGATGAAAAGGAACTTAATTTAATATTAACAACTGGAGGAACGGGGTTTGCACCACGAGATGTCACTCCAGAGGCCACAAAAGAAGTAATAGAGCGGGAAGCGCCAGGGATGGCCCTGGCAATGCTGATGGGATCGCTCAATGTCACACCTCTGGGCATGCTCTCTAGACCAGTGTGTGGAATAAGGGGGAAAACTCTGATAATTAA…
>GPHN_102
CCACGACCATCAAATCCGTGTCGGAGTCCTCACAGTGAGTGATAGCTGCTTCAGGAATCTTGCAGAAGACCGCAGTGGGATAAATCTAAAAGATCTTGTCCAAGATCCTTCTTTGTTGGGTGGGACTATATCGGCATACAAGATAGTACCAGATGAAATAGAAGAAATCAAGGAAACACTCATAGACTGGTGTGATGAAAAGGAACTTAATTTAATATTAACAACTGGAGGAACGGGGTTTGCACCACGAGATGTCACTCCAGAGGCCACAAAAGAAGTAATAGAGCGGGAAGCGCCAGGGATGGCCCTGGCAATGCTGATGGGATCGCTCAATGTCACACCTCTGGGCATGCTCTCTAGACCAGTGTGTGGAATAAGGGGGAAAACTCTGATAATTAA…
>GPHN_103
CCACGACCATCAAATCCGTGTCGGAGTCCTCACAGTGAGTGATAGCTGCTTCAGGAATCTTGCAGAAGACCGCAGTGGGATAAATCTAAAAGATCTTGTCCAAGATCCTTCTTTGTTGGGTGGGACTATATCGGCATACAAGATAGTACCAGATGAAATAGAAGAAATCAAGGCCACAAAAGAAGTAATAGAGCGGGAAGCGCCAGGGATGGCCCTGGCAATGCTGATGGGATCGCTCAATGTCACACCTCTGGGCATGCTCTCTAGACCAGTGTGTGGAATAAGGGGGAAAACTCTGATAATTAACCTACCTGGTAGCAAGAAAGGATCTCAGGAATGCTTTCAGTTCATACTGCCAGCTCTACCTCATGCCATTGACCTTTTACGTGATGCCATTGT…
>GPHN_104
CCACGACCATCAAATCCGTGTCGGAGTCCTCACAGTGAGTGATAGCTGCTTCAGGAATCTTGCAGAAGACCGCAGTGGGATAAATCTAAAAGATCTTGTCCAAGATCCTTCTTTGTTGGGTGGGACTATATCGGCATACAAGATAGTACCAGATGAAATAGAAGAAATCAAGGAAACACTCATAGACTGGTGTGATGAAAAGGAACTTAATTTAATATTAACAACTGGAGGAACGGGGTTTGCACCACGAGATGTCACTCCAGAGGCCACAAAAGAAGTAATAGAGCGGGAAGCGCCAGGGATGGCCCTGGCAATGCTGATGGGATCGCTCAATGTCACACCTCTGGGCATGCTCTCTAGACCAGTGTGTGGAATAAGGGGGAAAACTCTGATAATTAA…
>GPHN_105
CCACGACCATCAAATCCGTGTCGGAGTCCTCACAGGTTGGGTGGGACTATATCGGCATACAAGATAGTACCAGATGAAATAGAAGAAATCAAGGAAACACTCATAGACTGGTGTGATGAAAAGGAACTTAATTTAATATTAACAACTGGAGGAACGGGGTTTGCACCACGAGATGTCACTCCAGAGGCCACAAAAGAAGTAATAGAGCGGGAAGCGCCAGGGATGGCCCTGGCAATGCTGATGGGATCGCTCAATGTCACACCTCTGGGCATGCTCTCTAGACCAGTGTGTGGAATAAGGGGGAAAACTCTGATAATTAACCTACCTGGTAGCAAGAAAGGATCTCAGGAATGCTTTCAGTTCATACTGCCAGCTCTACCTCATGCCATTGACCTTTTA…
>GPHN_106
CCACGACCATCAAATCCGTGTCGGAGTCCTCACAGTGAGTGATAGCTGCTTCAGGAATCTTGCAGAAGACCGCAGTGGGATAAATCTAAAAGATCTTGTCCAAGATCCTTCTTTGTTGGGTGGGACTATATCGGCATACAAGATAGTACCAGATGAAATAGAAGAAATCAAGGAAACACTCATAGACTGGTGTGATGAAAAGGAACTTAATTTAATATTAACAACTGGAGGAACGGGGTTTGCACCACGAGATGTCACTCCAGAGGCCACAAAAGAAGTAATAGAGCGGGAAGCGCCAGGGATGGCCCTGGCAATGCTGATGGGATCGCTCAATGTCACACCTCTGGGCATGCTCTCTAGACCAGTGTGTGGAATAAGGGGGAAAACTCTGATAATTAA…
>GPHN_107
CCACGACCATCAAATCCGTGTCGGAGTCCTCACAGTGAGTGATAGCTGCTTCAGGAATCTTGCAGAAGACCGCAGTGGGATAAATCTAAAAGATCTTGTCCAAGATCCTTCTTTGTTGGGTGGGACTATATCGGCATACAAGATAGTACCAGATGAAATAGAAGAAATCAAGGAAACACTCATAGACTGGTGTGATGAAAAGGAACTTAATTTAATATTAACAACTGGAGGAACGGGGTTTGCACCACGAGATGTCACTCCAGAGAAATTCCCAACATTCCCATTTTGTGGGCTCCAGAAAGGGGCCACAAAAGAAGTAATAGAGCGGGAAGCGCCAGGGATGGCCCTGGCAATGCTGATGGGATCGCTCAATGTCACACCTCTGGGCATGCTCTCTAG…
>GPHN_108
CCACGACCATCAAATCCGTGTCGGAGTCCTCACAGTGAGTGATAGCTGCTTCAGGAATCTTGCAGAAGACCGCAGTGGGATAAATCTAAAAGATCTTGTCCAAGATCCTTCTTTGTTGGGTGGGACTATATCGGCATACAAGATAGTACCAGATGAAATAGAAGAAATCAAGCTTCCATATTTCTTCGTTCTGATGAGAGGCCTTGCCTACTCTTCACTGCTATCAACTGCTTGAGAAGCAAGGAGCTTTAAAAGCCTGAAAGGCATCTTCTAAATTAAGGAAACACTCATAGACTGGTGTGATGAAAAGGAACTTAATTTAATATTAACAACTGGAGGAACGGGGTTTGCACCACGAGATGTCACTCCAGAGGCCACAAAAGAAGTAATAGAGCGGGA…
>GPHN_109
CCACGACCATCAAATCCGTGTCGGAGTCCTCACAGTGAGTGATAGCTGCTTCAGGAATCTTGCAGAAGACCGCAGTGGGATAAATCTAAAAGATCTTGTCCAAGATCCTTCTTTGTTGGGTGGGACTATATCGGCATACAAGATAGTACCAGATGAAATAGAAGAAATCAAGGAAACACTCATAGACTGGTGTGATGAAAAGGAACTTAATTTAATATTAACAACTGGAGGAACGGGGTTTGCACCACGAGATGTCACTCCAGAGAAATTCCCAACATTCCCATTTTGTGGGCTCCAGAAAGGGGCCACAAAAGAAGTAATAGAGCGGGAAGCGCCAGGGATGGCCCTGGCAATGCTGATGGGATCGCTCAATGTCACACCTCTGGGCATGCTCTCTAG…
>GPHN_110
CCACGACCATCAAATCCGTGTCGGAGTCCTCACAGTGAGTGATAGCTGCTTCAGGAATCTTGCAGAAGACCGCAGTGGGATAAATCTAAAAGATCTTGTCCAAGATCCTTCTTTGTTGGGTGGGACTATATCGGCATACAAGATAGTACCAGATGAAATAGAAGAAATCAAGGAAACACTCATAGACTGGTGTGATGAAAAGGAACTTAATTTAATATTAACAACTGGAGGAACGGGGTTTGCACCACGAGATGTCACTCCAGAGGCCACAAAAGAAGTAATAGAGCGGGAAGCGCCAGGGATGGCCCTGGCAATGCTGATGGGATCGCTCAATGTCACACCTCTGGGCATGCTCTCTAGACCAGTGTGTGGAATAAGGGGGAAAACTCTGATAATTAA…
>GPHN_111
CCACGACCATCAAATCCGTGTCGGAGTCCTCACAGTGAGTGATAGCTGCTTCAGGAATCTTGCAGAAGACCGCAGTGGGATAAATCTAAAAGATCTTGTCCAAGATCCTTCTTTGAAACACTCATAGACTGGTGTGATGAAAAGGAACTTAATTTAATATTAACAACTGGAGGAACGGGGTTTGCACCACGAGATGTCACTCCAGAGGCCACAAAAGAAGTAATAGAGCGGGAAGCGCCAGGGATGGCCCTGGCAATGCTGATGGGATCGCTCAATGTCACACCTCTGGGCATGCTCTCTAGACCAGTGTGTGGAATAAGGGGGAAAACTCTGATAATTAACCTACCTGGTAGCAAGAAAGGATCTCAGGAATGCTTTCAGTTCATACTGCCAGCTCTA…
>GPHN_112
CCACGACCATCAAATCCGTGTCGGAGTCCTCACAGTGGTTGCCGTTATGTCAACAGGGAATGAGCTGCTAAATCCTGAAGATGATCTCTTACCAGGAAAGATTCGGGACAGCAATCGATCAACACTTCTAGCAACAATTCAGGAACATGGTTACCCAACAATCAACCTGGGAATTGTAGGAGACAACCCAGATGACTTACTCAATGCCTTGAATGAGGGTATCAGCCGTGCTGATGTCATCATCACGTCAGGAGGTGTGTCCATGGGGGAAAAGGACTATCTCAAGCAGGTGCTGGACATTGATCTTCATGCTCAGATCCATTTTGGCAGAGTTTTTATGAAGCCAGGCTTGCCAACAACATTTGCAACTTTGGATATTGATGGTGTAAGAAAAATTAT…
>GPHN_113
CCACGACCATCAAATCCGTGTCGGAGTCCTCACAGTGAGTGATAGCTGCTTCAGGAATCTTGCAGAAGACCGCAGTGGGATAAATCTAAAAGATCTTGTCCAAGATCCTTCTTTGTTGGGTGGGACTATATCGGCATACAAGATAGTACCAGATGAAATAGAAGAAATCAAGGAAACACTCATAGACTGGTGTGATGAAAAGGAACTTAATTTAATATTAACAACTGGAGGAACGGGGTTTGCACCACGAGATGTCACTCCAGAGGCCACAAAAGAAGTAATAGAGCGGGAAGCGCCAGGGATGGCCCTGGCAATGCTGATGGGATCGCTCAATGTCACACCTCTGGGCATGCTCTCTAGACCAGTGTGTGGAATAAGGGGGAAAACTCTGATAATTAA…
>GPHN_114
CCACGACCATCAAATCCGTGTCGGAGTCCTCACAGTGAGTGATAGCTGCTTCAGGAATCTTGCAGAAGACCGCAGTGGGATAAATCTAAAAGATCTTGTCCAAGATCCTTCTTTGTTGGGTGGGACTATATCGGCATACAAGATAGTACCAGATGAAATAGAAGAAATCAAGGAAACACTCATAGACTGGTGTGATGAAAAGGAACTTAATTTAATATTAACAACTGGAGGAACGGGGTTTGCACCACGAGATGTCACTCCAGAGGCCACAAAAGAAGTAATAGAGCGGGAAGCGCCAGGGATGGCCCTGGCAATGCTGATGGGATCGCTCAATGTCACACCTCTGGGCATGCTCTCTAGACCAGTGTGTGGAATAAGGGGGAAAACTCTGATAATTAA…
>GPHN_115
CCACGACCATCAAATCCGTGTCGGAGTCCTCACAGTGAGTGATAGCTGCTTCAGGAATCTTGCAGAAGACCGCAGTGGGATAAATCTAAAAGATCTTGTCCAAGATCCTTCTTTGTTGGGTGGGACTATATCGGCATACAAGATAGTACCAGATGAAATAGAAGAAATCAAGGAAACACTCATAGACTGGTGTGATGAAAAGGAACTTAATTTAATATTAACAACTGGAGGAACGGGGTTTGCACCACGAGATGTCACTCCAGAGGCCACAAAAGAAGTAATAGAGCGGGAAGCGCCAGGGATGGCCCTGGCAATGCTGATGGGATCGCTCAATGTCACACCTCTGGGCATGCTCTCTAGACCAGTGTGTGGAATAAGGGGGAAAACTCTGATAATTAA…
>GPHN_116
CCACGACCATCAAATCCGTGTCGGAGTCCTCACAGGAAACACTCATAGACTGGTGTGATGAAAAGGAACTTAATTTAATATTAACAACTGGAGGAACGGGGTTTGCACCACGAGATGTCACTCCAGAGGCCACAAAAGAAGTAATAGAGCGGGAAGCGCCAGGGATGGCCCTGGCAATGCTGATGGGATCGCTCAATGTCACACCTCTGGGCATGCTCTCTAGACCAGTGTGTGGAATAAGGGGGAAAACTCTGATAATTAACCTACCTGGTAGCAAGAAAGGATCTCAGGAATGCTTTCAGTTCATACTGCCAGCTCTACCTCATGCCATTGACCTTTTACGTGATGCCATTGTAAAAGTAAAGGAGGTGCATGATGAACTTGAAGATTTACCTTCCC…
>GPHN_117
CCACGACCATCAAATCCGTGTCGGAGTCCTCACAGTGAGTGATAGCTGCTTCAGGAATCTTGCAGAAGACCGCAGTGGGATAAATCTAAAAGATCTTGTCCAAGATCCTTCTTTGTTGGGTGGGACTATATCGGCATACAAGATAGTACCAGATGAAATAGAAGAAATCAAGGAAACACTCATAGACTGGTGTGATGAAAAGGAACTTAATTTAATATTAACAACTGGAGGAACGGGGTTTGCACCACGAGATGTCACTCCAGAGAAATTCCCAACATTCCCATTTTGTGGGCTCCAGAAAGGGGCCACAAAAGAAGTAATAGAGCGGGAAGCGCCAGGGATGGCCCTGGCAATGCTGATGGGATCGCTCAATGTCACACCTCTGGGCATGCTCTCTAG…
>GPHN_118
CCACGACCATCAAATCCGTGTCGGAGTCCTCACAGTGAGTGATAGCTGCTTCAGGAATCTTGCAGAAGACCGCAGTGGGATAAATCTAAAAGATCTTGTCCAAGATCCTTCTTTGTTGGGTGGGACTATATCGGCATACAAGATAGTACCAGATGAAATAGAAGAAATCAAGGAAACACTCATAGACTGGTGTGATGAAAAGGAACTTAATTTAATATTAACAACTGGAGGAACGGGGTTTGCACCACGAGATGTCACTCCAGAGGCCACAAAAGAAGTAATAGAGCGGGAAGCGCCAGGGATGGCCCTGGCAATGCTGATGGGATCGCTCAATGTCACACCTCTGGGCATGCTCTCTAGACCAGTGTGTGGAATAAGGGGGAAAACTCTGATAATTAA…
>GPHN_119
CCACGACCATCAAATCCGTGTCGGAGTCCTCACAGTGAGTGATAGCTGCTTCAGGAATCTTGCAGAAGACCGCAGTGGGATAAATCTAAAAGATCTTGTCCAAGATCCTTCTTTGTTGGGTGGGACTATATCGGCATACAAGATAGTACCAGATGAAATAGAAGAAATCAAGGAAACACTCATAGACTGGTGTGATGAAAAGGAACTTAATTTAATATTAACAACTGGAGGAACGGGGTTTGCACCACGAGATGTCACTCCAGAGGCCACAAAAGAAGTAATAGAGCGGGAAGCGCCAGGGATGGCCCTGGCAATGCTGATGGGATCGCTCAATGTCACACCTCTGGGCATGCTCTCTAGACCAGTGTGTGGAATAAGGGGGAAAACTCTGATAATTAA…
>GPHN_120
CCACGACCATCAAATCCGTGTCGGAGTCCTCACAGTGAGTGATAGCTGCTTCAGGAATCTTGCAGAAGACCGCAGTGGGATAAATCTAAAAGATCTTGTCCAAGATCCTTCTTTGTTGGGTGGGACTATATCGGCATACAAGATAGTACCAGATGAAATAGAAGAAATCAAGGAAACACTCATAGACTGGTGTGATGAAAAGGAACTTAATTTAATATTAACAACTGGAGGAACGGGGTTTGCACCACGAGATGTCACTCCAGAGAAATTCCCAACATTCCCATTTTGTGGGCTCCAGAAAGGGGCCACAAAAGAAGTAATAGAGCGGGAAGCGCCAGGGATGGCCCTGGCAATGCTGATGGGATCGCTCAATGTCACACCTCTGGGCATGCTCTCTAG…
>GPHN_121
CCACGACCATCAAATCCGTGTCGGAGTCCTCACAGTGAGTGATAGCTGCTTCAGGAATCTTGCAGAAGACCGCAGTGGGATAAATCTAAAAGATCTTGTCCAAGATCCTTCTTTGTTGGGTGGGACTATATCGGCATACAAGATAGTACCAGATGAAATAGAAGAAATCAAGGAAACACTCATAGACTGGTGTGATGAAAAGGAACTTAATTTAATATTAACAACTGGAGGAACGGGGTTTGCACCACGAGATGTCACTCCAGAGGCCACAAAAGAAGTAATAGAGCGGGAAGCGCCAGGGATGGCCCTGGCAATGCTGATGGGATCGCTCAATGTCACACCTCTGGGCATGCTCTCTAGACCAGTGTGTGGAATAAGGGGGAAAACTCTGATAATTAA…
>GPHN_122
CCACGACCATCAAATCCGTGTCGGAGTCCTCACAGTGAGTGATAGCTGCTTCAGGAATCTTGCAGAAGACCGCAGTGGGATAAATCTAAAAGATCTTGTCCAAGATCCTTCTTTGTTGGGTGGGACTATATCGGCATACAAGATAGTACCAGATGAAATAGAAGAAATCAAGGAAACACTCATAGACTGGTGTGATGAAAAGGAACTTAATTTAATATTAACAACTGGAGGAACGGGGTTTGCACCACGAGATGTCACTCCAGAGGCCACAAAAGAAGTAATAGAGCGGGAAGCGCCAGGGATGGCCCTGGCAATGCTGATGGGATCGCTCAATGTCACACCTCTGGGCATGCTCTCTAGACCAGTGTGTGGAATAAGGGGGAAAACTCTGATAATTAA…
>GPHN_123
CCACGACCATCAAATCCGTGTCGGAGTCCTCACAGTGAGTGATAGCTGCTTCAGGAATCTTGCAGAAGACCGCAGTGGGATAAATCTAAAAGATCTTGTCCAAGATCCTTCTTTGTTGGGTGGGACTATATCGGCATACAAGATAGTACCAGATGAAATAGAAGAAATCAAGGAAACACTCATAGACTGGTGTGATGAAAAGGAACTTAATTTAATATTAACAACTGGAGGAACGGGGTTTGCACCACGAGATGTCACTCCAGAGGCCACAAAAGAAGTAATAGAGCGGGAAGCGCCAGGGATGGCCCTGGCAATGCTGATGGGATCGCTCAATGTCACACCTCTGGGCATGCTCTCTAGACCAGTGTGTGGAATAAGGGGGAAAACTCTGATAATTAA…
>GPHN_124
CCACGACCATCAAATCCGTGTCGGAGTCCTCACAGTGAGTGATAGCTGCTTCAGGAATCTTGCAGAAGACCGCAGTGGGATAAATCTAAAAGATCTTGTCCAAGATCCTTCTTTGTTGGGTGGGACTATATCGGCATACAAGATAGTACCAGATGAAATAGAAGAAATCAAGGAAACACTCATAGACTGGTGTGATGAAAAGGAACTTAATTTAATATTAACAACTGGAGGAACGGGGTTTGCACCACGAGATGTCACTCCAGAGGCCACAAAAGAAGTAATAGAGCGGGAAGCGCCAGGGATGGCCCTGGCAATGCTGATGGGATCGCTCAATGTCACACCTCTGGGCATGCTCTCTAGACCAGTGTGTGGAATAAGGGGGAAAACTCTGATAATTAA…
>GPHN_125
CCACGACCATCAAATCCGTGTCGGAGTCCTCACAGTGAGTGATAGCTGCTTCAGGAATCTTGCAGAAGACCGCAGTGGGATAAATCTAAAAGATCTTGTCCAAGATCCTTCTTTGTTGGGTGGGACTATATCGGCATACAAGATAGTACCAGATGAAATAGAAGAAATCAAGGAAACACTCATAGACTGGTGTGATGAAAAGGAACTTAATTTAATATTAACAACTGGAGGAACGGGGTTTGCACCACGAGATGTCACTCCAGAGGCCACAAAAGAAGTAATAGAGCGGGAAGCGCCAGGGATGGCCCTGGCAATGCTGATGGGATCGCTCAATGTCACACCTCTGGGCATGCTCTCTAGGAATGCTTTCAGTTCATACTGCCAGCTCTACCTCATGCC…
>GPHN_126
CCACGACCATCAAATCCGTGTCGGAGTCCTCACAGGTTGGGTGGGACTATATCGGCATACAAGATAGTACCAGATGAAATAGAAGAAATCAAGGAAACACTCATAGACTGGTGTGATGAAAAGGAACTTAATTTAATATTAACAACTGGAGGAACGGGGTTTGCACCACGAGATGTCACTCCAGAGAAATTCCCAACATTCCCATTTTGTGGGCTCCAGAAAGGGGCCACAAAAGAAGTAATAGAGCGGGAAGCGCCAGGGATGGCCCTGGCAATGCTGATGGGATCGCTCAATGTCACACCTCTGGGCATGCTCTCTAGACCAGTGTGTGGAATAAGGGGGAAAACTCTGATAATTAACCTACCTGGTAGCAAGAAAGGATCTCAGGAATGCTTTCAG…
>GPHN_127
CCACGACCATCAAATCCGTGTCGGAGTCCTCACAGTGAGTGATAGCTGCTTCAGGAATCTTGCAGAAGACCGCAGTGGGATAAATCTAAAAGATCTTGTCCAAGATCCTTCTTTGTTGGGTGGGACTATATCGGCATACAAGATAGTACCAGATGAAATAGAAGAAATCAAGGAAACACTCATAGACTGGTGTGATGAAAAGGAACTTAATTTAATATTAACAACTGGAGGAACGGGGTTTGCACCACGAGATGTCACTCCAGAGGCCACAAAAGAAGTAATAGAGCGGGAAGCGCCAGGGATGGCCCTGGCAATGCTGATGGGATCGCTCAATGTCACACCTCTGGGCATGCTCTCTAGCCCAGATGACTTACTCAATGCCTTGAATGAGGGTATCAG…
>GPHN_128
CCACGACCATCAAATCCGTGTCGGAGTCCTCACAGTGAGTGATAGCTGCTTCAGGAATCTTGCAGAAGACCGCAGTGGGATAAATCTAAAAGATCTTGTCCAAGATCCTTCTTTGTTGGGTGGGACTATATCGGCATACAAGATAGTACCAGATGAAATAGAAGAAATCAAGCCAACTCAGACAGTAATGCCAGGACAAGTGATGCGGGTTACAACAGGTGCTCCAATCCCCTGCGGTGCTGATGCAGTAGTGCAAGTTGAAGATACTGAACTCATCAGGGAATCAGATGATGGTACTGAAGAACTTGAAGTACGAATTCTGGTGCAAGCTCGGCCAGGCCAAGATATCCGACCCATCGGCCATGACATTAAGAGAGGGGAGTGTGTTTTGGCCAAAGG…
>GPHN_129
CCACGACCATCAAATCCGTGTCGGAGTCCTCACAGTGAGTGATAGCTGCTTCAGGAATCTTGCAGAAGACCGCAGTGGGATAAATCTAAAAGATCTTGTCCAAGATCCTTCTTTGTTGGGTGGGACTATATCGGCATACAAGATAGTACCAGATGAAATAGAAGAAATCAAGGAAACACTCATAGACTGGTGTGATGAAAAGGAACTTAATTTAATATTAACAACTGGAGGAACGGGGTTTGCACCACGAGATGTCACTCCAGAGGCCACAAAAGAAGTAATAGAGCGGGAAGCGCCAGGGATGGCCCTGGCAATGCTGATGGGATCGCTCAATGTCACACCTCTGGGCATGCTCTCTAGACCAGTGTGTGGAATAAGGGGGAAAACTCTGATAATTAA…
>GPHN_130
CCACGACCATCAAATCCGTGTCGGAGTCCTCACAGTGAGTGATAGCTGCTTCAGGAATCTTGCAGAAGACCGCAGTGGGATAAATCTAAAAGATCTTGTCCAAGATCCTTCTTTGTTGGGTGGGACTATATCGGCATACAAGATAGTACCAGATGAAATAGAAGAAATCAAGGAAACACTCATAGACTGGTGTGATGAAAAGGAACTTAATTTAATATTAACAACTGGAGGAACGGGGTTTGCACCACGAGATGTCACTCCAGAGGCCACAAAAGAAGTAATAGAGCGGGAAGCGCCAGGGATGGCCCTGGCAATGCTGATGGGATCGCTCAATGTCACACCTCTGGGCATGCTCTCTAGACCAGTGTGTGGAATAAGGGGGAAAACTCTGATAATTAA…
>GPHN_131
CCACGACCATCAAATCCGTGTCGGAGTCCTCACAGTGAGTGATAGCTGCTTCAGGAATCTTGCAGAAGACCGCAGTGGGATAAATCTAAAAGATCTTGTCCAAGATCCTTCTTTGTTGGGTGGGACTATATCGGCATACAAGATAGTACCAGATGAAATAGAAGAAATCAAGGAAACACTCATAGACTGGTGTGATGAAAAGGAACTTAATTTAATATTAACAACTGGAGGAACGGGGTTTGCACCACGAGATGTCACTCCAGAGATTCCAGACTCCATCATTTCTCGTGGTGTTCAGGTGCTCCCACGAGACACAGCCTCCCTTAGCACTACTCCTTCAGAATCGCCCCGTGCTCAGGCTACATCTCGCCTCTCTACAGCTTCTTGTCCAACACCAAA…
>GPHN_132
CCACGACCATCAAATCCGTGTCGGAGTCCTCACAGTGAGTGATAGCTGCTTCAGGAATCTTGCAGAAGACCGCAGTGGGATAAATCTAAAAGATCTTGTCCAAGATCCTTCTTTGTTGGGTGGGACTATATCGGCATACAAGATAGTACCAGATGAAATAGAAGAAATCAAGAAATTCCCAACATTCCCATTTTGTGGGCTCCAGAAAGGGGCCACAAAAGAAGTAATAGAGCGGGAAGCGCCAGGGATGGCCCTGGCAATGCTGATGGGATCGCTCAATGTCACACCTCTGGGCATGCTCTCTAGACCAGTGTGTGGAATAAGGGGGAAAACTCTGATAATTAACCTACCTGGTAGCAAGAAAGGATCTCAGATTCCAGACTCCATCATTTCTCGTGG…
>GPHN_133
CCACGACCATCAAATCCGTGTCGGAGTCCTCACAGGAAACACTCATAGACTGGTGTGATGAAAAGGAACTTAATTTAATATTAACAACTGGAGGAACGGGGTTTGCACCACGAGATGTCACTCCAGAGGCCACAAAAGAAGTAATAGAGCGGGAAGCGCCAGGGATGGCCCTGGCAATGCTGATGGGATCGCTCAATGTCACACCTCTGGGCATGCTCTCTAGACCAGTGTGTGGAATAAGGGGGAAAACTCTGATAATTAACCTACCTGGTAGCAAGAAAGGATCTCAGGAATGCTTTCAGTTCATACTGCCAGCTCTACCTCATGCCATTGACCTTTTACGTGATGCCATTGTAAAAGTAAAGGAGGTGCATGATGAACTTGAAGATTTACCTTCCC…
>GPHN_134
CCACGACCATCAAATCCGTGTCGGAGTCCTCACAGGTCACAGTGCTGTAGATATCACCAAGGTGGCTAGAAGACATCGCATGTCTCCTTTTCCCCTGACGTCTATGGACAAAGCCTTCATTACAGTCCTGGAGATGACTCCGGTGCTTGGTACAGAAATCATCAATTACCGAGATGGAATGGGGCGAGTCCTTGCTCAAGATGTATATGCAAAAGACAACCTACCCCCATTCCCTGCATCAGTAAAAGATGGCTATGCTGTTCGAGCTGCTGATGGTCCAGGGGATCGTTTCATCATTGGGGAATCCCAAGCTGGTGAGCAGCCAACTCAGACAGTAATGCCAGGACAAGTGATGCGGGTTACAACAGGTGCTCCAATCCCCTGCGGTGCTGATGCAGT…
>GPHN_135
CCACGACCATCAAATCCGTGTCGGAGTCCTCACAGTGAGTGATAGCTGCTTCAGGAATCTTGCAGAAGACCGCAGTGGGATAAATCTAAAAGATCTTGTCCAAGATCCTTCTTTGTTGGGTGGGACTATATCGGCATACAAGATAGTACCAGATGAAATAGAAGAAATCAAGGAAACACTCATAGACTGGTGTGATGAAAAGGAACTTAATTTAATATTAACAACTGGAGGAACGGGGTTTGCACCACGAGATGTCACTCCAGAGAAATTCCCAACATTCCCATTTTGTGGGCTCCAGAAAGGGGCCACAAAAGAAGTAATAGAGCGGGAAGCGCCAGGGATGGCCCTGGCAATGCTGATGGGATCGCTCAATGTCACACCTCTGGGCATGCTCTCTAG…
>GPHN_136
CCACGACCATCAAATCCGTGTCGGAGTCCTCACAGTGAGTGATAGCTGCTTCAGGAATCTTGCAGAAGACCGCAGTGGGATAAATCTAAAAGATCTTGTCCAAGATCCTTCTTTGTTGGGTGGGACTATATCGGCATACAAGATAGTACCAGATGAAATAGAAGAAATCAAGGAAACACTCATAGACTGGTGTGATGAAAAGGAACTTAATTTAATATTAACAACTGGAGGAACGGGGTTTGCACCACGAGATGTCACTCCAGAGAAATTCCCAACATTCCCATTTTGTGGGCTCCAGAAAGGGGCCACAAAAGAAGTAATAGAGCGGGAAGCGCCAGGGATGGCCCTGGCAATGCTGATGGGATCGCTCAATGTCACACCTCTGGGCATGCTCTCTAG…
>GPHN_137
CCACGACCATCAAATCCGTGTCGGAGTCCTCACAGTGAGTGATAGCTGCTTCAGGAATCTTGCAGAAGACCGCAGTGGGATAAATCTAAAAGATCTTGTCCAAGATCCTTCTTTGTTGGGTGGGACTATATCGGCATACAAGATAGTACCAGATGAAATAGAAGAAATCAAGGAAACACTCATAGACTGGTGTGATGAAAAGGAACTTAATTTAATATTAACAACTGGAGGAACGGGGTTTGCACCACGAGATGTCACTCCAGAGGCCACAAAAGAAGTAATAGAGCGGGAAGCGCCAGGGATGGCCCTGGCAATGCTGATGGGATCGCTCAATGTCACACCTCTGGGCATGCTCTCTAGACCAGTGTGTGGAATAAGGGGGAAAACTCTGATAATTAA…
>GPHN_138
CCACGACCATCAAATCCGTGTCGGAGTCCTCACAGTGAGTGATAGCTGCTTCAGGAATCTTGCAGAAGACCGCAGTGGGATAAATCTAAAAGATCTTGTCCAAGATCCTTCTTTGTTGGGTGGGACTATATCGGCATACAAGATAGTACCAGATGAAATAGAAGAAATCAAGGAAACACTCATAGACTGGTGTGATGAAAAGGAACTTAATTTAATATTAACAACTGGAGGAACGGGGTTTGCACCACGAGATGTCACTCCAGAGGCCACAAAAGAAGTAATAGAGCGGGAAGCGCCAGGGATGGCCCTGGCAATGCTGATGGGATCGCTCAATGTCACACCTCTGGGCATGCTCTCTAGACCAGTGTGTGGAATAAGGGGGAAAACTCTGATAATTAA…
>GPHN_139
CCACGACCATCAAATCCGTGTCGGAGTCCTCACAGTGAGTGATAGCTGCTTCAGGAATCTTGCAGAAGACCGCAGTGGGATAAATCTAAAAGATCTTGTCCAAGATCCTTCTTTGTTGGGTGGGACTATATCGGCATACAAGATAGTACCAGATGAAATAGAAGAAATCAAGGAAACACTCATAGACTGGTGTGATGAAAAGGAACTTAATTTAATATTAACAACTGGAGGAACGGGGTTTGCACCACGAGATGTCACTCCAGAGAAATTCCCAACATTCCCATTTTGTGGGCTCCAGAAAGGGGCCACAAAAGAAGTAATAGAGCGGGAAGCGCCAGGGATGGCCCTGGCAATGCTGATGGGATCGCTCAATGTCACACCTCTGGGCATGCTCTCTAG…
>GPHN_140
CCACGACCATCAAATCCGTGTCGGAGTCCTCACAGTGAGTGATAGCTGCTTCAGGAATCTTGCAGAAGACCGCAGTGGGATAAATCTAAAAGATCTTGTCCAAGATCCTTCTTTGTTGGGTGGGACTATATCGGCATACAAGATAGTACCAGATGAAATAGAAGAAATCAAGGAAACACTCATAGACTGGTGTGATGAAAAGGAACTTAATTTAATATTAACAACTGGAGGAACGGGGTTTGCACCACGAGATGTCACTCCAGAGAAATTCCCAACATTCCCATTTTGTGGGCTCCAGAAAGGGGCCACAAAAGAAGTAATAGAGCGGGAAGCGCCAGGGATGGCCCTGGCAATGCTGATGGGATCGCTCAATGTCACACCTCTGGGCATGCTCTCTAG…
>GPHN_141
CCACGACCATCAAATCCGTGTCGGAGTCCTCACAGTGAGTGATAGCTGCTTCAGGAATCTTGCAGAAGACCGCAGTGGGATAAATCTAAAAGATCTTGTCCAAGATCCTTCTTTGTTGGGTGGGACTATATCGGCATACAAGATAGTACCAGATGAAATAGAAGAAATCAAGGAAACACTCATAGACTGGTGTGATGAAAAGGAACTTAATTTAATATTAACAACTGGAGGAACGGGGTTTGCACCACGAGATGTCACTCCAGAGAAATTCCCAACATTCCCATTTTGTGGGCTCCAGAAAGGGGCCACAAAAGAAGTAATAGAGCGGGAAGCGCCAGGGATGGCCCTGGCAATGCTGATGGGATCGCTCAATGTCACACCTCTGGGCATGCTCTCTAG…
>GPHN_142
CCACGACCATCAAATCCGTGTCGGAGTCCTCACAGTGAGTGATAGCTGCTTCAGGAATCTTGCAGAAGACCGCAGTGGGATAAATCTAAAAGATCTTGTCCAAGATCCTTCTTTGTTGGGTGGGACTATATCGGCATACAAGATAGTACCAGATGAAATAGAAGAAATCAAGGAAACACTCATAGACTGGTGTGATGAAAAGGAACTTAATTTAATATTAACAACTGGAGGAACGGGGTTTGCACCACGAGATGTCACTCCAGAGGCCACAAAAGAAGTAATAGAGCGGGAAGCGCCAGGGATGGCCCTGGCAATGCTGATGGGATCGCTCAATGTCACACCTCTGGGCATGCTCTCTAGACCAGTGTGTGGAATAAGGGGGAAAACTCTGATAATTAA…
>GPHN_143
CCACGACCATCAAATCCGTGTCGGAGTCCTCACAGTGAGTGATAGCTGCTTCAGGAATCTTGCAGAAGACCGCAGTGGGATAAATCTAAAAGATCTTGTCCAAGATCCTTCTTTGTTGGGTGGGACTATATCGGCATACAAGATAGTACCAGATGAAATAGAAGAAATCAAGGAAACACTCATAGACTGGTGTGATGAAAAGGAACTTAATTTAATATTAACAACTGGAGGAACGGGGTTTGCACCACGAGATGTCACTCCAGAGGCCACAAAAGAAGTAATAGAGCGGGAAGCGCCAGGGATGGCCCTGGCAATGCTGATGGGATCGCTCAATGTCACACCTCTGGGCATGCTCTCTAGACCAGTGTGTGGAATAAGGGGGAAAACTCTGATAATTAA…
>GPHN_144
CCACGACCATCAAATCCGTGTCGGAGTCCTCACAGTGAGTGATAGCTGCTTCAGGAATCTTGCAGAAGACCGCAGTGGGATAAATCTAAAAGATCTTGTCCAAGATCCTTCTTTGTTGGGTGGGACTATATCGGCATACAAGATAGTACCAGATGAAATAGAAGAAATCAAGGAAACACTCATAGACTGGTGTGATGAAAAGGAACTTAATTTAATATTAACAACTGGAGGAACGGGGTTTGCACCACGAGATGTCACTCCAGAGGCCACAAAAGAAGTAATAGAGCGGGAAGCGCCAGGGATGGCCCTGGCAATGCTGATGGGATCGCTCAATGTCACACCTCTGGGCATGCTCTCTAGACCAGTGTGTGGAATAAGGGGGAAAACTCTGATAATTAA…
>GPHN_145
CCACGACCATCAAATCCGTGTCGGAGTCCTCACAGTGAGTGATAGCTGCTTCAGGAATCTTGCAGAAGACCGCAGTGGGATAAATCTAAAAGATCTTGTCCAAGATCCTTCTTTGTTGGGTGGGACTATATCGGCATACAAGATAGTACCAGATGAAATAGAAGAAATCAAGGAAACACTCATAGACTGGTGTGATGAAAAGGAACTTAATTTAATATTAACAACTGGAGGAACGGGGTTTGCACCACGAGATGTCACTCCAGAGGCCACAAAAGAAGTAATAGAGCGGGAAGCGCCAGGGATGGCCCTGGCAATGCTGATGGGATCGCTCAATGTCACACCTCTGGGCATGCTCTCTAGACCAGTGTGTGGAATAAGGGGGAAAACTCTGATAATTAA…
>GPHN_146
CCACGACCATCAAATCCGTGTCGGAGTCCTCACAGTGAGTGATAGCTGCTTCAGGAATCTTGCAGAAGACCGCAGTGGGATAAATCTAAAAGATCTTGTCCAAGATCCTTCTTTGTTGGGTGGGACTATATCGGCATACAAGATAGTACCAGATGAAATAGAAGAAATCAAGGAAACACTCATAGACTGGTGTGATGAAAAGGAACTTAATTTAATATTAACAACTGGAGGAACGGGGTTTGCACCACGAGATGTCACTCCAGAGGCCACAAAAGAAGTAATAGAGCGGGAAGCGCCAGGGATGGCCCTGGCAATGCTGATGGGATCGCTCAATGTCACACCTCTGGGCATGCTCTCTAGACCAGTGTGTGGAATAAGGGGGAAAACTCTGATAATTAA…
>GPHN_147
CCACGACCATCAAATCCGTGTCGGAGTCCTCACAGTGAGTGATAGCTGCTTCAGGAATCTTGCAGAAGACCGCAGTGGGATAAATCTAAAAGATCTTGTCCAAGATCCTTCTTTGTTGGGTGGGACTATATCGGCATACAAGATAGTACCAGATGAAATAGAAGAAATCAAGGAAACACTCATAGACTGGTGTGATGAAAAGGAACTTAATTTAATATTAACAACTGGAGGAACGGGGTTTGCACCACGAGATGTCACTCCAGAGGCCACAAAAGAAGTAATAGAGCGGGAAGCGCCAGGGATGGCCCTGGCAATGCTGATGGGATCGCTCAATGTCACACCTCTGGGCATGCTCTCTAGACCAGTGTGTGGAATAAGGGGGAAAACTCTGATAATTAA…
>GPHN_148
CCACGACCATCAAATCCGTGTCGGAGTCCTCACAGTGAGTGATAGCTGCTTCAGGAATCTTGCAGAAGACCGCAGTGGGATAAATCTAAAAGATCTTGTCCAAGATCCTTCTTTGTTGGGTGGGACTATATCGGCATACAAGATAGTACCAGATGAAATAGAAGAAATCAAGGAAACACTCATAGACTGGTGTGATGAAAAGGAACTTAATTTAATATTAACAACTGGAGGAACGGGGTTTGCACCACGAGATGTCACTCCAGAGATTCCAGACTCCATCATTTCTCGTGGTGTTCAGGTGCTCCCACGAGACACAGCCTCCCTTAGCACTACTCCTTCAGAATCGCCCCGTGCTCAGGCTACATCTCGCCTCTCTACAGCTTCTTGTCCAACACCAAA…
>GPHN_149
CCACGACCATCAAATCCGTGTCGGAGTCCTCACAGTGAGTGATAGCTGCTTCAGGAATCTTGCAGAAGACCGCAGTGGGATAAATCTAAAAGATCTTGTCCAAGATCCTTCTTTGTTGGGTGGGACTATATCGGCATACAAGATAGTACCAGATGAAATAGAAGAAATCAAGAAATTCCCAACATTCCCATTTTGTGGGCTCCAGAAAGGGGCCACAAAAGAAGTAATAGAGCGGGAAGCGCCAGGGATGGCCCTGGCAATGCTGATGGGATCGCTCAATGTCACACCTCTGGGCATGCTCTCTAGACCAGTGTGTGGAATAAGGGGGAAAACTCTGATAATTAACCTACCTGGTAGCAAGAAAGGATCTCAGGAATGCTTTCAGTTCATACTGCCAGC…
>GPHN_150
CCACGACCATCAAATCCGTGTCGGAGTCCTCACAGGTTGGGTGGGACTATATCGGCATACAAGATAGTACCAGATGAAATAGAAGAAATCAAGGAAACACTCATAGACTGGTGTGATGAAAAGGAACTTAATTTAATATTAACAACTGGAGGAACGGGGTTTGCACCACGAGATGTCACTCCAGAGGCCACAAAAGAAGTAATAGAGCGGGAAGCGCCAGGGATGGCCCTGGCAATGCTGATGGGATCGCTCAATGTCACACCTCTGGGCATGCTCTCTAGACCAGTGTGTGGAATAAGGGGGAAAACTCTGATAATTAACCTACCTGGTAGCAAGAAAGGATCTCAGGAATGCTTTCAGTTCATACTGCCAGCTCTACCTCATGCCATTGACCTTTTA…
>GPHN_151
CCACGACCATCAAATCCGTGTCGGAGTCCTCACAGGCCACAAAAGAAGTAATAGAGCGGGAAGCGCCAGGGATGGCCCTGGCAATGCTGATGGGATCGCTCAATGTCACACCTCTGGGCATGCTCTCTAGACCAGTGTGTGGAATAAGGGGGAAAACTCTGATAATTAACCTACCTGGTAGCAAGAAAGGATCTCAGGAATGCTTTCAGTTCATACTGCCAGCTCTACCTCATGCCATTGACCTTTTACGTGATGCCATTGTAAAAGTAAAGGAGGTGCATGATGAACTTGAAGATTTACCTTCCCCACCACCTCCTCTCTCTCCACCTCCTACAACTAGCCCACATAAACAGACAGAAGACAAAGGAGTTCAGTGTGAAGAAGAGGAAGAAGAAAAGA…
>GPHN_152
CCACGACCATCAAATCCGTGTCGGAGTCCTCACAGTGAGTGATAGCTGCTTCAGGAATCTTGCAGAAGACCGCAGTGGGATAAATCTAAAAGATCTTGTCCAAGATCCTTCTTTGTTGGGTGGGACTATATCGGCATACAAGATAGTACCAGATGAAATAGAAGAAATCAAGGAAACACTCATAGACTGGTGTGATGAAAAGGAACTTAATTTAATATTAACAACTGGAGGAACGGGGTTTGCACCACGAGATGTCACTCCAGAGGCCACAAAAGAAGTAATAGAGCGGGAAGCGCCAGGGATGGCCCTGGCAATGCTGATGGGATCGCTCAATGTCACACCTCTGGGCATGCTCTCTAGACCAGTGTGTGGAATAAGGGGGAAAACTCTGATAATTAA…
>GPHN_153
CCACGACCATCAAATCCGTGTCGGAGTCCTCACAGGTTGGGTGGGACTATATCGGCATACAAGATAGTACCAGATGAAATAGAAGAAATCAAGGAAACACTCATAGACTGGTGTGATGAAAAGGAACTTAATTTAATATTAACAACTGGAGGAACGGGGTTTGCACCACGAGATGTCACTCCAGAGAAATTCCCAACATTCCCATTTTGTGGGCTCCAGAAAGGGGCCACAAAAGAAGTAATAGAGCGGGAAGCGCCAGGGATGGCCCTGGCAATGCTGATGGGATCGCTCAATGTCACACCTCTGGGCATGCTCTCTAGACCAGTGTGTGGAATAAGGGGGAAAACTCTGATAATTAACCTACCTGGTAGCAAGAAAGGATCTCAGATTCCAGACTCC…
>GPHN_154
CCACGACCATCAAATCCGTGTCGGAGTCCTCACAGTGAGTGATAGCTGCTTCAGGAATCTTGCAGAAGACCGCAGTGGGATAAATCTAAAAGATCTTGTCCAAGATCCTTCTTTGTTGGGTGGGACTATATCGGCATACAAGATAGTACCAGATGAAATAGAAGAAATCAAGGAAACACTCATAGACTGGTGTGATGAAAAGGAACTTAATTTAATATTAACAACTGGAGGAACGGGGTTTGCACCACGAGATGTCACTCCAGAGAAATTCCCAACATTCCCATTTTGTGGGCTCCAGAAAGGGGCCACAAAAGAAGTAATAGAGCGGGAAGCGCCAGGGATGGCCCTGGCAATGCTGATGGGATCGCTCAATGTCACACCTCTGGGCATGCTCTCTAG…
>GPHN_155
CCACGACCATCAAATCCGTGTCGGAGTCCTCACAGTGAGTGATAGCTGCTTCAGGAATCTTGCAGAAGACCGCAGTGGGATAAATCTAAAAGATCTTGTCCAAGATCCTTCTTTGTTGGGTGGGACTATATCGGCATACAAGATAGTACCAGATGAAATAGAAGAAATCAAGGAAACACTCATAGACTGGTGTGATGAAAAGGAACTTAATTTAATATTAACAACTGGAGGAACGGGGTTTGCACCACGAGATGTCACTCCAGAGAAATTCCCAACATTCCCATTTTGTGGGCTCCAGAAAGGGGCCACAAAAGAAGTAATAGAGCGGGAAGCGCCAGGGATGGCCCTGGCAATGCTGATGGGATCGCTCAATGTCACACCTCTGGGCATGCTCTCTAG…
>GPHN_156
CCACGACCATCAAATCCGTGTCGGAGTCCTCACAGTGAGTGATAGCTGCTTCAGGAATCTTGCAGAAGACCGCAGTGGGATAAATCTAAAAGATCTTGTCCAAGATCCTTCTTTACCAGTGTGTGGAATAAGGGGGAAAACTCTGATAATTAACCTACCTGGTAGCAAGAAAGGATCTCAGGAATGCTTTCAGTTCATACTGCCAGCTCTACCTCATGCCATTGACCTTTTACGTGATGCCATTGTAAAAGTAAAGGAGGTGCATGATGAACTTGAAGATTTACCTTCCCCACCACCTCCTCTCTCTCCACCTCCTACAACTAGCCCACATAAACAGACAGAAGACAAAGGAGTTCAGTGTGAAGAAGAGGAAGAAGAAAAGAAAGACAGTGGTGTAGC…
>GPHN_157
CCACGACCATCAAATCCGTGTCGGAGTCCTCACAGTGAGTGATAGCTGCTTCAGGAATCTTGCAGAAGACCGCAGTGGGATAAATCTAAAAGATCTTGTCCAAGATCCTTCTTTGTTGGGTGGGACTATATCGGCATACAAGATAGTACCAGATGAAATAGAAGAAATCAAGGAAACACTCATAGACTGGTGTGATGAAAAGGAACTTAATTTAATATTAACAACTGGAGGAACGGGGTTTGCACCACGAGATGTCACTCCAGAGGCCACAAAAGAAGTAATAGAGCGGGAAGCGCCAGGGATGGCCCTGGCAATGCTGATGGGATCGCTCAATGTCACACCTCTGGGCATGCTCTCTAGACCAGTGTGTGGAATAAGGGGGAAAACTCTGATAATTAA…
>GPHN_158
CCACGACCATCAAATCCGTGTCGGAGTCCTCACAGTGAGTGATAGCTGCTTCAGGAATCTTGCAGAAGACCGCAGTGGGATAAATCTAAAAGATCTTGTCCAAGATCCTTCTTTGTTGGGTGGGACTATATCGGCATACAAGATAGTACCAGATGAAATAGAAGAAATCAAGGAAACACTCATAGACTGGTGTGATGAAAAGGAACTTAATTTAATATTAACAACTGGAGGAACGGGGTTTGCACCACGAGATGTCACTCCAGAGGCCACAAAAGAAGTAATAGAGCGGGAAGCGCCAGGGATGGCCCTGGCAATGCTGATGGGATCGCTCAATGTCACACCTCTGGGCATGCTCTCTAGACCAGTGTGTGGAATAAGGGGGAAAACTCTGATAATTAA…
>GPHN_159
CCACGACCATCAAATCCGTGTCGGAGTCCTCACAGTGAGTGATAGCTGCTTCAGGAATCTTGCAGAAGACCGCAGTGGGATAAATCTAAAAGATCTTGTCCAAGATCCTTCTTTGTTGGGTGGGACTATATCGGCATACAAGATAGTACCAGATGAAATAGAAGAAATCAAGGAAACACTCATAGACTGGTGTGATGAAAAGGAACTTAATTTAATATTAACAACTGGAGGAACGGGGTTTGCACCACGAGATGTCACTCCAGAGGCCACAAAAGAAGTAATAGAGCGGGAAGCGCCAGGGATGGCCCTGGCAATGCTGATGGGATCGCTCAATGTCACACCTCTGGGCATGCTCTCTAGACCAGTGTGTGGAATAAGGGGGAAAACTCTGATAATTAA…
>GPHN_160
CCACGACCATCAAATCCGTGTCGGAGTCCTCACAGTGAGTGATAGCTGCTTCAGGAATCTTGCAGAAGACCGCAGTGGGATAAATCTAAAAGATCTTGTCCAAGATCCTTCTTTGTTGGGTGGGACTATATCGGCATACAAGATAGTACCAGATGAAATAGAAGAAATCAAGGAAACACTCATAGACTGGTGTGATGAAAAGGAACTTAATTTAATATTAACAACTGGAGGAACGGGGTTTGCACCACGAGATGTCACTCCAGAGACCAGTGTGTGGAATAAGGGGGAAAACTCTGATAATTAACCTACCTGGTAGCAAGAAAGGATCTCAGCCCACATAAACAGACAGAAGACAAAGGAGTTCAGTGTGAAGAAGAGGAAGAAGAAAAGAAAGACAGT…
>GPHN_161
CCACGACCATCAAATCCGTGTCGGAGTCCTCACAGGTCACAGTGCTGTAGATATCACCAAGGTGGCTAGAAGACATCGCATGTCTCCTTTTCCCCTGACGTCTATGGACAAAGCCTTCATTACAGTCCTGGAGATGACTCCGGTGCTTGGTACAGAAATCATCAATTACCGAGATGGAATGGGGCGAGTCCTTGCTCAAGATGTATATGCAAAAGACAACCTACCCCCATTCCCTGCATCAGTAAAAGATGGCTATGCTGTTCGAGCTGCTGATGGTCCAGGGGATCGTTTCATCATTGGGGAATCCCAAGCTGGTGAGCAGCCAACTCAGACAGTAATGCCAGGACAAGTGATGCGGGTTACAACAGGTGCTCCAATCCCCTGCGGTGCTGATGCAGT…
>GPHN_162
CCACGACCATCAAATCCGTGTCGGAGTCCTCACAGTGAGTGATAGCTGCTTCAGGAATCTTGCAGAAGACCGCAGTGGGATAAATCTAAAAGATCTTGTCCAAGATCCTTCTTTGTTGGGTGGGACTATATCGGCATACAAGATAGTACCAGATGAAATAGAAGAAATCAAGGAAACACTCATAGACTGGTGTGATGAAAAGGAACTTAATTTAATATTAACAACTGGAGGAACGGGGTTTGCACCACGAGATGTCACTCCAGAGAAATTCCCAACATTCCCATTTTGTGGGCTCCAGAAAGGGGCCACAAAAGAAGTAATAGAGCGGGAAGCGCCAGGGATGGCCCTGGCAATGCTGATGGGATCGCTCAATGTCACACCTCTGGGCATGCTCTCTAG…
>GPHN_163
CCACGACCATCAAATCCGTGTCGGAGTCCTCACAGATCCTTCGACAAAAACCTATACTAAACAAAACTGGAGAACCTGCATGAAATGGACAAGTTTCTAGACAGATACCAGTGAGTGATAGCTGCTTCAGGAATCTTGCAGAAGACCGCAGTGGGATAAATCTAAAAGATCTTGTCCAAGATCCTTCTTTGTTGGGTGGGACTATATCGGCATACAAGATAGTACCAGATGAAATAGAAGAAATCAAGGAAACACTCATAGACTGGTGTGATGAAAAGGAACTTAATTTAATATTAACAACTGGAGGAACGGGGTTTGCACCACGAGATGTCACTCCAGAGAAATTCCCAACATTCCCATTTTGTGGGCTCCAGAAAGGGGCCACAAAAGAAGTAATAG…
>GPHN_164
CCACGACCATCAAATCCGTGTCGGAGTCCTCACAGTGAGTGATAGCTGCTTCAGGAATCTTGCAGAAGACCGCAGTGGGATAAATCTAAAAGATCTTGTCCAAGATCCTTCTTTGTTGGGTGGGACTATATCGGCATACAAGATAGTACCAGATGAAATAGAAGAAATCAAGGAAACACTCATAGACTGGTGTGATGAAAAGGAACTTAATTTAATATTAACAACTGGAGGAACGGGGTTTGCACCACGAGATGTCACTCCAGAGACCAGTGTGTGGAATAAGGGGGAAAACTCTGATAATTAACCTACCTGGTAGCAAGAAAGGATCTCAGGAATGCTTTCAGTTCATACTGCCAGCTCTACCTCATGCCATTGACCTTTTACGTGATGCCATTGTAA…
>GPHN_165
CCACGACCATCAAATCCGTGTCGGAGTCCTCACAGTGAGTGATAGCTGCTTCAGGAATCTTGCAGAAGACCGCAGTGGGATAAATCTAAAAGATCTTGTCCAAGATCCTTCTTTGTTGGGTGGGACTATATCGGCATACAAGATAGTACCAGATGAAATAGAAGAAATCAAGGAAACACTCATAGACTGGTGTGATGAAAAGGAACTTAATTTAATATTAACAACTGGAGGAACGGGGTTTGCACCACGAGATGTCACTCCAGAGGCCACAAAAGAAGTAATAGAGCGGGAAGCGCCAGGGATGGCCCTGGCAATGCTGATGGGATCGCTCAATGTCACACCTCTGGGCATGCTCTCTAGACCAGTGTGTGGAATAAGGGGGAAAACTCTGATAATTAA…
>GPHN_166
CCACGACCATCAAATCCGTGTCGGAGTCCTCACAGACCAGTGTGTGGAATAAGGGGGAAAACTCTGATAATTAACCTACCTGGTAGCAAGAAAGGATCTCAGCCCACATAAACAGACAGAAGACAAAGGAGTTCAGTGTGAAGAAGAGGAAGAAGAAAAGAAAGACAGTGGTGTAGCTTCAACAGAAGATAGTTCCTCATCACATATAACTGCAGCAGCTCTTGCTGCAAAGATTCCAGACTCCATCATTTCTCGTGGTGTTCAGGTGCTCCCACGAGACACAGCCTCCCTTAGCACTACTCCTTCAGAATCGCCCCGTGCTCAGGCTACATCTCGCCTCTCTACAGCTTCTTGTCCAACACCAAAAGTCCAGTCCAGGTGCAGCAGCAAGGAGAACAT…
>GPHN_167
CCACGACCATCAAATCCGTGTCGGAGTCCTCACAGTGAGTGATAGCTGCTTCAGGAATCTTGCAGAAGACCGCAGTGGGATAAATCTAAAAGATCTTGTCCAAGATCCTTCTTTGTTGGGTGGGACTATATCGGCATACAAGATAGTACCAGATGAAATAGAAGAAATCAAGGAAACACTCATAGACTGGTGTGATGAAAAGGAACTTAATTTAATATTAACAACTGGAGGAACGGGGTTTGCACCACGAGATGTCACTCCAGAGAAATTCCCAACATTCCCATTTTGTGGGCTCCAGAAAGGGGCCACAAAAGAAGTAATAGAGCGGGAAGCGCCAGGGATGGCCCTGGCAATGCTGATGGGATCGCTCAATGTCACACCTCTGGGCATGCTCTCTAG…
>GPHN_168
CCACGACCATCAAATCCGTGTCGGAGTCCTCACAGTGAGTGATAGCTGCTTCAGGAATCTTGCAGAAGACCGCAGTGGGATAAATCTAAAAGATCTTGTCCAAGATCCTTCTTTGTTGGGTGGGACTATATCGGCATACAAGATAGTACCAGATGAAATAGAAGAAATCAAGGAAACACTCATAGACTGGTGTGATGAAAAGGAACTTAATTTAATATTAACAACTGGAGGAACGGGGTTTGCACCACGAGATGTCACTCCAGAGAAATTCCCAACATTCCCATTTTGTGGGCTCCAGAAAGGGGCCACAAAAGAAGTAATAGAGCGGGAAGCGCCAGGGATGGCCCTGGCAATGCTGATGGGATCGCTCAATGTCACACCTCTGGGCATGCTCTCTAG…
>GPHN_169
CCACGACCATCAAATCCGTGTCGGAGTCCTCACAGTGAGTGATAGCTGCTTCAGGAATCTTGCAGAAGACCGCAGTGGGATAAATCTAAAAGATCTTGTCCAAGATCCTTCTTTGTTGGGTGGGACTATATCGGCATACAAGATAGTACCAGATGAAATAGAAGAAATCAAGGAAACACTCATAGACTGGTGTGATGAAAAGGAACTTAATTTAATATTAACAACTGGAGGAACGGGGTTTGCACCACGAGATGTCACTCCAGAGGCCACAAAAGAAGTAATAGAGCGGGAAGCGCCAGGGATGGCCCTGGCAATGCTGATGGGATCGCTCAATGTCACACCTCTGGGCATGCTCTCTAGACCAGTGTGTGGAATAAGGGGGAAAACTCTGATAATTAA…
>GPHN_170
CCACGACCATCAAATCCGTGTCGGAGTCCTCACAGTGAGTGATAGCTGCTTCAGGAATCTTGCAGAAGACCGCAGTGGGATAAATCTAAAAGATCTTGTCCAAGATCCTTCTTTGTTGGGTGGGACTATATCGGCATACAAGATAGTACCAGATGAAATAGAAGAAATCAAGGAAACACTCATAGACTGGTGTGATGAAAAGGAACTTAATTTAATATTAACAACTGGAGGAACGGGGTTTGCACCACGAGATGTCACTCCAGAGGCCACAAAAGAAGTAATAGAGCGGGAAGCGCCAGGGATGGCCCTGGCAATGCTGATGGGATCGCTCAATGTCACACCTCTGGGCATGCTCTCTAGACCAGTGTGTGGAATAAGGGGGAAAACTCTGATAATTAA…
>GPHN_171
CCACGACCATCAAATCCGTGTCGGAGTCCTCACAGTGAGTGATAGCTGCTTCAGGAATCTTGCAGAAGACCGCAGTGGGATAAATCTAAAAGATCTTGTCCAAGATCCTTCTTTGTTGGGTGGGACTATATCGGCATACAAGATAGTACCAGATGAAATAGAAGAAATCAAGGAAACACTCATAGACTGGTGTGATGAAAAGGAACTTAATTTAATATTAACAACTGGAGGAACGGGGTTTGCACCACGAGATGTCACTCCAGAGGCCACAAAAGAAGTAATAGAGCGGGAAGCGCCAGGGATGGCCCTGGCAATGCTGATGGGATCGCTCAATGTCACACCTCTGGGCATGCTCTCTAGACCAGTGTGTGGAATAAGGGGGAAAACTCTGATAATTAA…
>GPHN_172
CCACGACCATCAAATCCGTGTCGGAGTCCTCACAGTGAGTGATAGCTGCTTCAGGAATCTTGCAGAAGACCGCAGTGGGATAAATCTAAAAGATCTTGTCCAAGATCCTTCTTTGTTGGGTGGGACTATATCGGCATACAAGATAGTACCAGATGAAATAGAAGAAATCAAGGAAACACTCATAGACTGGTGTGATGAAAAGGAACTTAATTTAATATTAACAACTGGAGGAACGGGGTTTGCACCACGAGATGTCACTCCAGAGGCCACAAAAGAAGTAATAGAGCGGGAAGCGCCAGGGATGGCCCTGGCAATGCTGATGGGATCGCTCAATGTCACACCTCTGGGCATGCTCTCTAGACCAGTGTGTGGAATAAGGGGGAAAACTCTGATAATTAA…
>GPHN_173
CCACGACCATCAAATCCGTGTCGGAGTCCTCACAGTGAGTGATAGCTGCTTCAGGAATCTTGCAGAAGACCGCAGTGGGATAAATCTAAAAGATCTTGTCCAAGATCCTTCTTTGTTGGGTGGGACTATATCGGCATACAAGATAGTACCAGATGAAATAGAAGAAATCAAGGAAACACTCATAGACTGGTGTGATGAAAAGGAACTTAATTTAATATTAACAACTGGAGGAACGGGGTTTGCACCACGAGATGTCACTCCAGAGGCCACAAAAGAAGTAATAGAGCGGGAAGCGCCAGGGATGGCCCTGGCAATGCTGATGGGATCGCTCAATGTCACACCTCTGGGCATGCTCTCTAGATTCCAGACTCCATCATTTCTCGTGGTGTTCAGGTGCTC…
>GPHN_174
CCACGACCATCAAATCCGTGTCGGAGTCCTCACAGTGAGTGATAGCTGCTTCAGGAATCTTGCAGAAGACCGCAGTGGGATAAATCTAAAAGATCTTGTCCAAGATCCTTCTTTGTTGGGTGGGACTATATCGGCATACAAGATAGTACCAGATGAAATAGAAGAAATCAAGGAAACACTCATAGACTGGTGTGATGAAAAGGAACTTAATTTAATATTAACAACTGGAGGAACGGGGTTTGCACCACGAGATGTCACTCCAGAGACCAGTGTGTGGAATAAGGGGGAAAACTCTGATAATTAACCTACCTGGTAGCAAGAAAGGATCTCAGGAATGCTTTCAGTTCATACTGCCAGCTCTACCTCATGCCATTGACCTTTTACGTGATGCCATTGTAA…
>GPHN_175
CCACGACCATCAAATCCGTGTCGGAGTCCTCACAGTGAGTGATAGCTGCTTCAGGAATCTTGCAGAAGACCGCAGTGGGATAAATCTAAAAGATCTTGTCCAAGATCCTTCTTTGTTGGGTGGGACTATATCGGCATACAAGATAGTACCAGATGAAATAGAAGAAATCAAGGAAACACTCATAGACTGGTGTGATGAAAAGGAACTTAATTTAATATTAACAACTGGAGGAACGGGGTTTGCACCACGAGATGTCACTCCAGAGGAATGCTTTCAGTTCATACTGCCAGCTCTACCTCATGCCATTGACCTTTTACGTGATGCCATTGTAAAAGTAAAGGAGGTGCATGATGAACTTGAAGATTTACCTTCCCCACCACCTCCTCTCTCTCCACCTCC…
>GPHN_176
CCACGACCATCAAATCCGTGTCGGAGTCCTCACAGTGAGTGATAGCTGCTTCAGGAATCTTGCAGAAGACCGCAGTGGGATAAATCTAAAAGATCTTGTCCAAGATCCTTCTTTGTTGGGTGGGACTATATCGGCATACAAGATAGTACCAGATGAAATAGAAGAAATCAAGGCCACAAAAGAAGTAATAGAGCGGGAAGCGCCAGGGATGGCCCTGGCAATGCTGATGGGATCGCTCAATGTCACACCTCTGGGCATGCTCTCTAGACCAGTGTGTGGAATAAGGGGGAAAACTCTGATAATTAACCTACCTGGTAGCAAGAAAGGATCTCAGGAATGCTTTCAGTTCATACTGCCAGCTCTACCTCATGCCATTGACCTTTTACGTGATGCCATTGT…
>GPHN_177
CCACGACCATCAAATCCGTGTCGGAGTCCTCACAGTGAGTGATAGCTGCTTCAGGAATCTTGCAGAAGACCGCAGTGGGATAAATCTAAAAGATCTTGTCCAAGATCCTTCTTTGTTGGGTGGGACTATATCGGCATACAAGATAGTACCAGATGAAATAGAAGAAATCAAGGCCACAAAAGAAGTAATAGAGCGGGAAGCGCCAGGGATGGCCCTGGCAATGCTGATGGGATCGCTCAATGTCACACCTCTGGGCATGCTCTCTAGACCAGTGTGTGGAATAAGGGGGAAAACTCTGATAATTAACCTACCTGGTAGCAAGAAAGGATCTCAGGAATGCTTTCAGTTCATACTGCCAGCTCTACCTCATGCCATTGACCTTTTACGTGATGCCATTGT…
>GPHN_178
CCACGACCATCAAATCCGTGTCGGAGTCCTCACAGTGAGTGATAGCTGCTTCAGGAATCTTGCAGAAGACCGCAGTGGGATAAATCTAAAAGATCTTGTCCAAGATCCTTCTTTGAAACACTCATAGACTGGTGTGATGAAAAGGAACTTAATTTAATATTAACAACTGGAGGAACGGGGTTTGCACCACGAGATGTCACTCCAGAGGCCACAAAAGAAGTAATAGAGCGGGAAGCGCCAGGGATGGCCCTGGCAATGCTGATGGGATCGCTCAATGTCACACCTCTGGGCATGCTCTCTAGACCAGTGTGTGGAATAAGGGGGAAAACTCTGATAATTAACCTACCTGGTAGCAAGAAAGGATCTCAGGAATGCTTTCAGTTCATACTGCCAGCTCTA…
>GPHN_179
CCACGACCATCAAATCCGTGTCGGAGTCCTCACAGTGAGTGATAGCTGCTTCAGGAATCTTGCAGAAGACCGCAGTGGGATAAATCTAAAAGATCTTGTCCAAGATCCTTCTTTGCCACAAAAGAAGTAATAGAGCGGGAAGCGCCAGGGATGGCCCTGGCAATGCTGATGGGATCGCTCAATGTCACACCTCTGGGCATGCTCTCTAGACCAGTGTGTGGAATAAGGGGGAAAACTCTGATAATTAACCTACCTGGTAGCAAGAAAGGATCTCAGATTCCAGACTCCATCATTTCTCGTGGTGTTCAGGTGCTCCCACGAGACACAGCCTCCCTTAGCACTACTCCTTCAGAATCGCCCCGTGCTCAGGCTACATCTCGCCTCTCTACAGCTTCTTGT…
>GPHN_180
CCACGACCATCAAATCCGTGTCGGAGTCCTCACAGGAAACACTCATAGACTGGTGTGATGAAAAGGAACTTAATTTAATATTAACAACTGGAGGAACGGGGTTTGCACCACGAGATGTCACTCCAGAGGCCACAAAAGAAGTAATAGAGCGGGAAGCGCCAGGGATGGCCCTGGCAATGCTGATGGGATCGCTCAATGTCACACCTCTGGGCATGCTCTCTAGACCAGTGTGTGGAATAAGGGGGAAAACTCTGATAATTAACCTACCTGGTAGCAAGAAAGGATCTCAGGAATGCTTTCAGTTCATACTGCCAGCTCTACCTCATGCCATTGACCTTTTACGTGATGCCATTGTAAAAGTAAAGGAGGTGCATGATGAACTTGAAGATTTACCTTCCC…
>GPHN_181
CCACGACCATCAAATCCGTGTCGGAGTCCTCACAGTGAGTGATAGCTGCTTCAGGAATCTTGCAGAAGACCGCAGTGGGATAAATCTAAAAGATCTTGTCCAAGATCCTTCTTTGTTGGGTGGGACTATATCGGCATACAAGATAGTACCAGATGAAATAGAAGAAATCAAGGAAACACTCATAGACTGGTGTGATGAAAAGGAACTTAATTTAATATTAACAACTGGAGGAACGGGGTTTGCACCACGAGATGTCACTCCAGAGGCCACAAAAGAAGTAATAGAGCGGGAAGCGCCAGGGATGGCCCTGGCAATGCTGATGGGATCGCTCAATGTCACACCTCTGGGCATGCTCTCTAGACCAGTGTGTGGAATAAGGGGGAAAACTCTGATAATTAA…
>GPHN_182
CCACGACCATCAAATCCGTGTCGGAGTCCTCACAGTGAGTGATAGCTGCTTCAGGAATCTTGCAGAAGACCGCAGTGGGATAAATCTAAAAGATCTTGTCCAAGATCCTTCTTTGAAACACTCATAGACTGGTGTGATGAAAAGGAACTTAATTTAATATTAACAACTGGAGGAACGGGGTTTGCACCACGAGATGTCACTCCAGAGGCCACAAAAGAAGTAATAGAGCGGGAAGCGCCAGGGATGGCCCTGGCAATGCTGATGGGATCGCTCAATGTCACACCTCTGGGCATGCTCTCTAGACCAGTGTGTGGAATAAGGGGGAAAACTCTGATAATTAACCTACCTGGTAGCAAGAAAGGATCTCAGGAATGCTTTCAGTTCATACTGCCAGCTCTA…
>GPHN_183
CCACGACCATCAAATCCGTGTCGGAGTCCTCACAGGTTGGGTGGGACTATATCGGCATACAAGATAGTACCAGATGAAATAGAAGAAATCAAGGAAACACTCATAGACTGGTGTGATGAAAAGGAACTTAATTTAATATTAACAACTGGAGGAACGGGGTTTGCACCACGAGATGTCACTCCAGAGGCCACAAAAGAAGTAATAGAGCGGGAAGCGCCAGGGATGGCCCTGGCAATGCTGATGGGATCGCTCAATGTCACACCTCTGGGCATGCTCTCTAGACCAGTGTGTGGAATAAGGGGGAAAACTCTGATAATTAACCTACCTGGTAGCAAGAAAGGATCTCAGCCCACATAAACAGACAGAAGACAAAGGAGTTCAGTGTGAAGAAGAGGAAGA…
>GPHN_184
CCACGACCATCAAATCCGTGTCGGAGTCCTCACAGGAATGCTTTCAGTTCATACTGCCAGCTCTACCTCATGCCATTGACCTTTTACGTGATGCCATTGTAAAAGTAAAGGAGGTGCATGATGAACTTGAAGATTTACCTTCCCCACCACCTCCTCTCTCTCCACCTCCTACAACTAGCCCACATAAACAGACAGAAGACAAAGGAGTTCAGTGTGAAGAAGAGGAAGAAGAAAAGAAAGACAGTGGTGTAGCTTCAACAGAAGATAGTTCCTCATCACATATAACTGCAGCAGCTCTTGCTGCAAAGATTCCAGACTCCATCATTTCTCGTGGTGTTCAGGTGCTCCCACGAGACACAGCCTCCCTTAGCACTACTCCTTCAGAATCGCCCCGTGCTC…
>GPHN_185
CCACGACCATCAAATCCGTGTCGGAGTCCTCACAGACCAGTGTGTGGAATAAGGGGGAAAACTCTGATAATTAACCTACCTGGTAGCAAGAAAGGATCTCAGGAATGCTTTCAGTTCATACTGCCAGCTCTACCTCATGCCATTGACCTTTTACGTGATGCCATTGTAAAAGTAAAGGAGGTGCATGATGAACTTGAAGATTTACCTTCCCCACCACCTCCTCTCTCTCCACCTCCTACAACTAGCCCACATAAACAGACAGAAGACAAAGGAGTTCAGTGTGAAGAAGAGGAAGAAGAAAAGAAAGACAGTGGTGTAGCTTCAACAGAAGATAGTTCCTCATCACATATAACTGCAGCAGCTCTTGCTGCAAAGAAGCATCCATTCTACACCAGTCCT…
>GPHN_186
CCACGACCATCAAATCCGTGTCGGAGTCCTCACAGGCCACAAAAGAAGTAATAGAGCGGGAAGCGCCAGGGATGGCCCTGGCAATGCTGATGGGATCGCTCAATGTCACACCTCTGGGCATGCTCTCTAGACCAGTGTGTGGAATAAGGGGGAAAACTCTGATAATTAACCTACCTGGTAGCAAGAAAGGATCTCAGATTCCAGACTCCATCATTTCTCGTGGTGTTCAGGTGCTCCCACGAGACACAGCCTCCCTTAGCACTACTCCTTCAGAATCGCCCCGTGCTCAGGCTACATCTCGCCTCTCTACAGCTTCTTGTCCAACACCAAAAGTCCAGTCCAGGTGCAGCAGCAAGGAGAACATTCTAAGAGCCAGTCACAGTGCTGTAGATATCACCA…
>GPHN_187
CCACGACCATCAAATCCGTGTCGGAGTCCTCACAGGTTGGGTGGGACTATATCGGCATACAAGATAGTACCAGATGAAATAGAAGAAATCAAGGAAACACTCATAGACTGGTGTGATGAAAAGGAACTTAATTTAATATTAACAACTGGAGGAACGGGGTTTGCACCACGAGATGTCACTCCAGAGGCCACAAAAGAAGTAATAGAGCGGGAAGCGCCAGGGATGGCCCTGGCAATGCTGATGGGATCGCTCAATGTCACACCTCTGGGCATGCTCTCTAGACCAGTGTGTGGAATAAGGGGGAAAACTCTGATAATTAACCTACCTGGTAGCAAGAAAGGATCTCAGGAATGCTTTCAGTTCATACTGCCAGCTCTACCTCATGCCATTGACCTTTTA…
>GPHN_188
CCACGACCATCAAATCCGTGTCGGAGTCCTCACAGTGAGTGATAGCTGCTTCAGGAATCTTGCAGAAGACCGCAGTGGGATAAATCTAAAAGATCTTGTCCAAGATCCTTCTTTGTTGGGTGGGACTATATCGGCATACAAGATAGTACCAGATGAAATAGAAGAAATCAAGGCCACAAAAGAAGTAATAGAGCGGGAAGCGCCAGGGATGGCCCTGGCAATGCTGATGGGATCGCTCAATGTCACACCTCTGGGCATGCTCTCTAGACCAGTGTGTGGAATAAGGGGGAAAACTCTGATAATTAACCTACCTGGTAGCAAGAAAGGATCTCAGATTCCAGACTCCATCATTTCTCGTGGTGTTCAGGTGCTCCCACGAGACACAGCCTCCCTTAGCAC…
>GPHN_189
CCACGACCATCAAATCCGTGTCGGAGTCCTCACAGTGAGTGATAGCTGCTTCAGGAATCTTGCAGAAGACCGCAGTGGGATAAATCTAAAAGATCTTGTCCAAGATCCTTCTTTGTTGGGTGGGACTATATCGGCATACAAGATAGTACCAGATGAAATAGAAGAAATCAAGGCCACAAAAGAAGTAATAGAGCGGGAAGCGCCAGGGATGGCCCTGGCAATGCTGATGGGATCGCTCAATGTCACACCTCTGGGCATGCTCTCTAGACCAGTGTGTGGAATAAGGGGGAAAACTCTGATAATTAACCTACCTGGTAGCAAGAAAGGATCTCAGGAATGCTTTCAGTTCATACTGCCAGCTCTACCTCATGCCATTGACCTTTTACGTGATGCCATTGT…
>GPHN_190
CCACGACCATCAAATCCGTGTCGGAGTCCTCACAGTGAGTGATAGCTGCTTCAGGAATCTTGCAGAAGACCGCAGTGGGATAAATCTAAAAGATCTTGTCCAAGATCCTTCTTTGTTGGGTGGGACTATATCGGCATACAAGATAGTACCAGATGAAATAGAAGAAATCAAGGCCACAAAAGAAGTAATAGAGCGGGAAGCGCCAGGGATGGCCCTGGCAATGCTGATGGGATCGCTCAATGTCACACCTCTGGGCATGCTCTCTAGACCAGTGTGTGGAATAAGGGGGAAAACTCTGATAATTAACCTACCTGGTAGCAAGAAAGGATCTCAGGAATGCTTTCAGTTCATACTGCCAGCTCTACCTCATGCCATTGACCTTTTACGTGATGCCATTGT…
>GPHN_191
CCACGACCATCAAATCCGTGTCGGAGTCCTCACAGTGAGTGATAGCTGCTTCAGGAATCTTGCAGAAGACCGCAGTGGGATAAATCTAAAAGATCTTGTCCAAGATCCTTCTTTGTTGGGTGGGACTATATCGGCATACAAGATAGTACCAGATGAAATAGAAGAAATCAAGGAAACACTCATAGACTGGTGTGATGAAAAGGAACTTAATTTAATATTAACAACTGGAGGAACGGGGTTTGCACCACGAGATGTCACTCCAGAGGTCCAGTCCAGGTGCAGCAGCAAGGAGAACATTCTAAGAGCCAGTCACAGTGCTGTAGATATCACCAAGGTGGCTAGAAGACATCGCATGTCTCCTTTTCCCCTGACGTCTATGGACAAAGCCTTCATTACAGT…
>GPHN_192
CCACGACCATCAAATCCGTGTCGGAGTCCTCACAGTGAGTGATAGCTGCTTCAGGAATCTTGCAGAAGACCGCAGTGGGATAAATCTAAAAGATCTTGTCCAAGATCCTTCTTTGTTGGGTGGGACTATATCGGCATACAAGATAGTACCAGATGAAATAGAAGAAATCAAGGAAACACTCATAGACTGGTGTGATGAAAAGGAACTTAATTTAATATTAACAACTGGAGGAACGGGGTTTGCACCACGAGATGTCACTCCAGAGACCAGTGTGTGGAATAAGGGGGAAAACTCTGATAATTAACCTACCTGGTAGCAAGAAAGGATCTCAGGAATGCTTTCAGTTCATACTGCCAGCTCTACCTCATGCCATTGACCTTTTACGTGATGCCATTGTAA…
>GPHN_193
CCACGACCATCAAATCCGTGTCGGAGTCCTCACAGTGAGTGATAGCTGCTTCAGGAATCTTGCAGAAGACCGCAGTGGGATAAATCTAAAAGATCTTGTCCAAGATCCTTCTTTGTTGGGTGGGACTATATCGGCATACAAGATAGTACCAGATGAAATAGAAGAAATCAAGGAAACACTCATAGACTGGTGTGATGAAAAGGAACTTAATTTAATATTAACAACTGGAGGAACGGGGTTTGCACCACGAGATGTCACTCCAGAGGCCACAAAAGAAGTAATAGAGCGGGAAGCGCCAGGGATGGCCCTGGCAATGCTGATGGGATCGCTCAATGTCACACCTCTGGGCATGCTCTCTAGACCAGTGTGTGGAATAAGGGGGAAAACTCTGATAATTAA…
>GPHN_194
CCACGACCATCAAATCCGTGTCGGAGTCCTCACAGTGAGTGATAGCTGCTTCAGGAATCTTGCAGAAGACCGCAGTGGGATAAATCTAAAAGATCTTGTCCAAGATCCTTCTTTGTTGGGTGGGACTATATCGGCATACAAGATAGTACCAGATGAAATAGAAGAAATCAAGGAAACACTCATAGACTGGTGTGATGAAAAGGAACTTAATTTAATATTAACAACTGGAGGAACGGGGTTTGCACCACGAGATGTCACTCCAGAGGCCACAAAAGAAGTAATAGAGCGGGAAGCGCCAGGGATGGCCCTGGCAATGCTGATGGGATCGCTCAATGTCACACCTCTGGGCATGCTCTCTAGACCAGTGTGTGGAATAAGGGGGAAAACTCTGATAATTAA…
>GPHN_195
CCACGACCATCAAATCCGTGTCGGAGTCCTCACAGTGAGTGATAGCTGCTTCAGGAATCTTGCAGAAGACCGCAGTGGGATAAATCTAAAAGATCTTGTCCAAGATCCTTCTTTGTTGGGTGGGACTATATCGGCATACAAGATAGTACCAGATGAAATAGAAGAAATCAAGGAAACACTCATAGACTGGTGTGATGAAAAGGAACTTAATTTAATATTAACAACTGGAGGAACGGGGTTTGCACCACGAGATGTCACTCCAGAGGCCACAAAAGAAGTAATAGAGCGGGAAGCGCCAGGGATGGCCCTGGCAATGCTGATGGGATCGCTCAATGTCACACCTCTGGGCATGCTCTCTAGACCAGTGTGTGGAATAAGGGGGAAAACTCTGATAATTAA…
>GPHN_196
CCACGACCATCAAATCCGTGTCGGAGTCCTCACAGTGAGTGATAGCTGCTTCAGGAATCTTGCAGAAGACCGCAGTGGGATAAATCTAAAAGATCTTGTCCAAGATCCTTCTTTGTTGGGTGGGACTATATCGGCATACAAGATAGTACCAGATGAAATAGAAGAAATCAAGGCCACAAAAGAAGTAATAGAGCGGGAAGCGCCAGGGATGGCCCTGGCAATGCTGATGGGATCGCTCAATGTCACACCTCTGGGCATGCTCTCTAGACCAGTGTGTGGAATAAGGGGGAAAACTCTGATAATTAACCTACCTGGTAGCAAGAAAGGATCTCAGCCCACATAAACAGACAGAAGACAAAGGAGTTCAGTGTGAAGAAGAGGAAGAAGAAAAGAAAGACA…
>GPHN_197
CCACGACCATCAAATCCGTGTCGGAGTCCTCACAGTGAGTGATAGCTGCTTCAGGAATCTTGCAGAAGACCGCAGTGGGATAAATCTAAAAGATCTTGTCCAAGATCCTTCTTTGTTGGGTGGGACTATATCGGCATACAAGATAGTACCAGATGAAATAGAAGAAATCAAGGAAACACTCATAGACTGGTGTGATGAAAAGGAACTTAATTTAATATTAACAACTGGAGGAACGGGGTTTGCACCACGAGATGTCACTCCAGAGGCCACAAAAGAAGTAATAGAGCGGGAAGCGCCAGGGATGGCCCTGGCAATGCTGATGGGATCGCTCAATGTCACACCTCTGGGCATGCTCTCTAGACCAGTGTGTGGAATAAGGGGGAAAACTCTGATAATTAA…
>GPHN_198
CCACGACCATCAAATCCGTGTCGGAGTCCTCACAGTGAGTGATAGCTGCTTCAGGAATCTTGCAGAAGACCGCAGTGGGATAAATCTAAAAGATCTTGTCCAAGATCCTTCTTTGTTGGGTGGGACTATATCGGCATACAAGATAGTACCAGATGAAATAGAAGAAATCAAGGAAACACTCATAGACTGGTGTGATGAAAAGGAACTTAATTTAATATTAACAACTGGAGGAACGGGGTTTGCACCACGAGATGTCACTCCAGAGGCCACAAAAGAAGTAATAGAGCGGGAAGCGCCAGGGATGGCCCTGGCAATGCTGATGGGATCGCTCAATGTCACACCTCTGGGCATGCTCTCTAGACCAGTGTGTGGAATAAGGGGGAAAACTCTGATAATTAA…
>GPHN_199
CCACGACCATCAAATCCGTGTCGGAGTCCTCACAGTGAGTGATAGCTGCTTCAGGAATCTTGCAGAAGACCGCAGTGGGATAAATCTAAAAGATCTTGTCCAAGATCCTTCTTTGTTGGGTGGGACTATATCGGCATACAAGATAGTACCAGATGAAATAGAAGAAATCAAGGAAACACTCATAGACTGGTGTGATGAAAAGGAACTTAATTTAATATTAACAACTGGAGGAACGGGGTTTGCACCACGAGATGTCACTCCAGAGGCCACAAAAGAAGTAATAGAGCGGGAAGCGCCAGGGATGGCCCTGGCAATGCTGATGGGATCGCTCAATGTCACACCTCTGGGCATGCTCTCTAGACCAGTGTGTGGAATAAGGGGGAAAACTCTGATAATTAA…
>GPHN_200
CCACGACCATCAAATCCGTGTCGGAGTCCTCACAGTGAGTGATAGCTGCTTCAGGAATCTTGCAGAAGACCGCAGTGGGATAAATCTAAAAGATCTTGTCCAAGATCCTTCTTTGTTGGGTGGGACTATATCGGCATACAAGATAGTACCAGATGAAATAGAAGAAATCAAGGAAACACTCATAGACTGGTGTGATGAAAAGGAACTTAATTTAATATTAACAACTGGAGGAACGGGGTTTGCACCACGAGATGTCACTCCAGAGAAATTCCCAACATTCCCATTTTGTGGGCTCCAGAAAGGGGCCACAAAAGAAGTAATAGAGCGGGAAGCGCCAGGGATGGCCCTGGCAATGCTGATGGGATCGCTCAATGTCACACCTCTGGGCATGCTCTCTAG…
>GPHN_201
CCACGACCATCAAATCCGTGTCGGAGTCCTCACAGTGAGTGATAGCTGCTTCAGGAATCTTGCAGAAGACCGCAGTGGGATAAATCTAAAAGATCTTGTCCAAGATCCTTCTTTGTTGGGTGGGACTATATCGGCATACAAGATAGTACCAGATGAAATAGAAGAAATCAAGGAAACACTCATAGACTGGTGTGATGAAAAGGAACTTAATTTAATATTAACAACTGGAGGAACGGGGTTTGCACCACGAGATGTCACTCCAGAGAAATTCCCAACATTCCCATTTTGTGGGCTCCAGAAAGGGGCCACAAAAGAAGTAATAGAGCGGGAAGCGCCAGGGATGGCCCTGGCAATGCTGATGGGATCGCTCAATGTCACACCTCTGGGCATGCTCTCTAG…
>GPHN_202
CCACGACCATCAAATCCGTGTCGGAGTCCTCACAGTGAGTGATAGCTGCTTCAGGAATCTTGCAGAAGACCGCAGTGGGATAAATCTAAAAGATCTTGTCCAAGATCCTTCTTTGAGTACACTGAACTGGATGAACTATTGTTTTAACATGGTCAAGAAGGGATGCCATGGTACAAAAGAAATATGAGAACATTCCAAACCTGGCAGGATTATTTTATCTTGTTTCTAACTTCCATTCATGGGAGCAAAGTTTGACTTGTGGTTGGGTGGGACTATATCGGCATACAAGATAGTACCAGATGAAATAGAAGAAATCAAGGAAACACTCATAGACTGGTGTGATGAAAAGGAACTTAATTTAATATTAACAACTGGAGGAACGGGGTTTGCACCACGAGA…
>GPHN_203
CCACGACCATCAAATCCGTGTCGGAGTCCTCACAGGAAAGATTCGGGACAGCAATCGATCAACACTTCTAGCAACAATTCAGGAACATGGTTACCCAACAATCAACCTGGGAATTGTAGGAGACAACCCAGATGACTTACTCAATGCCTTGAATGAGGGTATCAGCCGTGCTGATGTCATCATCACGTCAGGAGGTGTGTCCATGGGGGAAAAGGACTATCTCAAGCAGGTGCTGGACATTGATCTTCATGCTCAGATCCATTTTGGCAGAGTTTTTATGAAGCCAGGCTTGCCAACAACATTTGCAACTTTGGATATTGATGGTGTAAGAAAAATTATTTTTGCACTACCAGGGAATCCTGTATCAGCTGTGGTCACCTGCAACCTCTTTGTTGTACC…
>GPHN_204
CCACGACCATCAAATCCGTGTCGGAGTCCTCACAGTGAGTGATAGCTGCTTCAGGAATCTTGCAGAAGACCGCAGTGGGATAAATCTAAAAGATCTTGTCCAAGATCCTTCTTTGTTGGGTGGGACTATATCGGCATACAAGATAGTACCAGATGAAATAGAAGAAATCAAGGAAACACTCATAGACTGGTGTGATGAAAAGGAACTTAATTTAATATTAACAACTGGAGGAACGGGGTTTGCACCACGAGATGTCACTCCAGAGGCCACAAAAGAAGTAATAGAGCGGGAAGCGCCAGGGATGGCCCTGGCAATGCTGATGGGATCGCTCAATGTCACACCTCTGGGCATGCTCTCTAGACCAGTGTGTGGAATAAGGGGGAAAACTCTGATAATTAA…
>GPHN_205
CCACGACCATCAAATCCGTGTCGGAGTCCTCACAGTGAGTGATAGCTGCTTCAGGAATCTTGCAGAAGACCGCAGTGGGATAAATCTAAAAGATCTTGTCCAAGATCCTTCTTTGAAACACTCATAGACTGGTGTGATGAAAAGGAACTTAATTTAATATTAACAACTGGAGGAACGGGGTTTGCACCACGAGATGTCACTCCAGAGGCCACAAAAGAAGTAATAGAGCGGGAAGCGCCAGGGATGGCCCTGGCAATGCTGATGGGATCGCTCAATGTCACACCTCTGGGCATGCTCTCTAGACCAGTGTGTGGAATAAGGGGGAAAACTCTGATAATTAACCTACCTGGTAGCAAGAAAGGATCTCAGATTCCAGACTCCATCATTTCTCGTGGTGTT…
>GPHN_206
CCACGACCATCAAATCCGTGTCGGAGTCCTCACAGTGAGTGATAGCTGCTTCAGGAATCTTGCAGAAGACCGCAGTGGGATAAATCTAAAAGATCTTGTCCAAGATCCTTCTTTGAAACACTCATAGACTGGTGTGATGAAAAGGAACTTAATTTAATATTAACAACTGGAGGAACGGGGTTTGCACCACGAGATGTCACTCCAGAGAAATTCCCAACATTCCCATTTTGTGGGCTCCAGAAAGGGGCCACAAAAGAAGTAATAGAGCGGGAAGCGCCAGGGATGGCCCTGGCAATGCTGATGGGATCGCTCAATGTCACACCTCTGGGCATGCTCTCTAGACCAGTGTGTGGAATAAGGGGGAAAACTCTGATAATTAACCTACCTGGTAGCAAGAAA…
>GPHN_207
CCACGACCATCAAATCCGTGTCGGAGTCCTCACAGTGAGTGATAGCTGCTTCAGGAATCTTGCAGAAGACCGCAGTGGGATAAATCTAAAAGATCTTGTCCAAGATCCTTCTTTGTTGGGTGGGACTATATCGGCATACAAGATAGTACCAGATGAAATAGAAGAAATCAAGGAAACACTCATAGACTGGTGTGATGAAAAGGAACTTAATTTAATATTAACAACTGGAGGAACGGGGTTTGCACCACGAGATGTCACTCCAGAGATTCCAGACTCCATCATTTCTCGTGGTGTTCAGGTGCTCCCACGAGACACAGCCTCCCTTAGCACTACTCCTTCAGAATCGCCCCGTGCTCAGGCTACATCTCGCCTCTCTACAGCTTCTTGTCCAACACCAAA…
>GPHN_208
CCACGACCATCAAATCCGTGTCGGAGTCCTCACAGTGAGTGATAGCTGCTTCAGGAATCTTGCAGAAGACCGCAGTGGGATAAATCTAAAAGATCTTGTCCAAGATCCTTCTTTGTTGGGTGGGACTATATCGGCATACAAGATAGTACCAGATGAAATAGAAGAAATCAAGGAAACACTCATAGACTGGTGTGATGAAAAGGAACTTAATTTAATATTAACAACTGGAGGAACGGGGTTTGCACCACGAGATGTCACTCCAGAGGCCACAAAAGAAGTAATAGAGCGGGAAGCGCCAGGGATGGCCCTGGCAATGCTGATGGGATCGCTCAATGTCACACCTCTGGGCATGCTCTCTAGACCAGTGTGTGGAATAAGGGGGAAAACTCTGATAATTAA…
>GPHN_209
CCACGACCATCAAATCCGTGTCGGAGTCCTCACAGTGAGTGATAGCTGCTTCAGGAATCTTGCAGAAGACCGCAGTGGGATAAATCTAAAAGATCTTGTCCAAGATCCTTCTTTGTTGGGTGGGACTATATCGGCATACAAGATAGTACCAGATGAAATAGAAGAAATCAAGGAAACACTCATAGACTGGTGTGATGAAAAGGAACTTAATTTAATATTAACAACTGGAGGAACGGGGTTTGCACCACGAGATGTCACTCCAGAGGCCACAAAAGAAGTAATAGAGCGGGAAGCGCCAGGGATGGCCCTGGCAATGCTGATGGGATCGCTCAATGTCACACCTCTGGGCATGCTCTCTAGACCAGTGTGTGGAATAAGGGGGAAAACTCTGATAATTAA…
>GPHN_210
CCACGACCATCAAATCCGTGTCGGAGTCCTCACAGTGAGTGATAGCTGCTTCAGGAATCTTGCAGAAGACCGCAGTGGGATAAATCTAAAAGATCTTGTCCAAGATCCTTCTTTGTTGGGTGGGACTATATCGGCATACAAGATAGTACCAGATGAAATAGAAGAAATCAAGGAAACACTCATAGACTGGTGTGATGAAAAGGAACTTAATTTAATATTAACAACTGGAGGAACGGGGTTTGCACCACGAGATGTCACTCCAGAGGCCACAAAAGAAGTAATAGAGCGGGAAGCGCCAGGGATGGCCCTGGCAATGCTGATGGGATCGCTCAATGTCACACCTCTGGGCATGCTCTCTAGACCAGTGTGTGGAATAAGGGGGAAAACTCTGATAATTAA…
>GPHN_211
CCACGACCATCAAATCCGTGTCGGAGTCCTCACAGTGAGTGATAGCTGCTTCAGGAATCTTGCAGAAGACCGCAGTGGGATAAATCTAAAAGATCTTGTCCAAGATCCTTCTTTGTTGGGTGGGACTATATCGGCATACAAGATAGTACCAGATGAAATAGAAGAAATCAAGGAAACACTCATAGACTGGTGTGATGAAAAGGAACTTAATTTAATATTAACAACTGGAGGAACGGGGTTTGCACCACGAGATGTCACTCCAGAGGCCACAAAAGAAGTAATAGAGCGGGAAGCGCCAGGGATGGCCCTGGCAATGCTGATGGGATCGCTCAATGTCACACCTCTGGGCATGCTCTCTAGACCAGTGTGTGGAATAAGGGGGAAAACTCTGATAATTAA…
>GPHN_212
CCACGACCATCAAATCCGTGTCGGAGTCCTCACAGTGAGTGATAGCTGCTTCAGGAATCTTGCAGAAGACCGCAGTGGGATAAATCTAAAAGATCTTGTCCAAGATCCTTCTTTGTTGGGTGGGACTATATCGGCATACAAGATAGTACCAGATGAAATAGAAGAAATCAAGGAAACACTCATAGACTGGTGTGATGAAAAGGAACTTAATTTAATATTAACAACTGGAGGAACGGGGTTTGCACCACGAGATGTCACTCCAGAGGCCACAAAAGAAGTAATAGAGCGGGAAGCGCCAGGGATGGCCCTGGCAATGCTGATGGGATCGCTCAATGTCACACCTCTGGGCATGCTCTCTAGACCAGTGTGTGGAATAAGGGGGAAAACTCTGATAATTAA…
>GPHN_213
CCACGACCATCAAATCCGTGTCGGAGTCCTCACAGTGAGTGATAGCTGCTTCAGGAATCTTGCAGAAGACCGCAGTGGGATAAATCTAAAAGATCTTGTCCAAGATCCTTCTTTGTTGGGTGGGACTATATCGGCATACAAGATAGTACCAGATGAAATAGAAGAAATCAAGGAAACACTCATAGACTGGTGTGATGAAAAGGAACTTAATTTAATATTAACAACTGGAGGAACGGGGTTTGCACCACGAGATGTCACTCCAGAGAAATTCCCAACATTCCCATTTTGTGGGCTCCAGAAAGGGATTCCAGACTCCATCATTTCTCGTGGTGTTCAGGTGCTCCCACGAGACACAGCCTCCCTTAGCACTACTCCTTCAGAATCGCCCCGTGCTCAGGC…
>GPHN_214
CCACGACCATCAAATCCGTGTCGGAGTCCTCACAGTGAGTGATAGCTGCTTCAGGAATCTTGCAGAAGACCGCAGTGGGATAAATCTAAAAGATCTTGTCCAAGATCCTTCTTTGTTGGGTGGGACTATATCGGCATACAAGATAGTACCAGATGAAATAGAAGAAATCAAGGAAACACTCATAGACTGGTGTGATGAAAAGGAACTTAATTTAATATTAACAACTGGAGGAACGGGGTTTGCACCACGAGATGTCACTCCAGAGAAATTCCCAACATTCCCATTTTGTGGGCTCCAGAAAGGGACCAGTGTGTGGAATAAGGGGGAAAACTCTGATAATTAACCTACCTGGTAGCAAGAAAGGATCTCAGGAATGCTTTCAGTTCATACTGCCAGCTC…
>GPHN_215
CCACGACCATCAAATCCGTGTCGGAGTCCTCACAGTGAGTGATAGCTGCTTCAGGAATCTTGCAGAAGACCGCAGTGGGATAAATCTAAAAGATCTTGTCCAAGATCCTTCTTTGTTGGGTGGGACTATATCGGCATACAAGATAGTACCAGATGAAATAGAAGAAATCAAGGAAACACTCATAGACTGGTGTGATGAAAAGGAACTTAATTTAATATTAACAACTGGAGGAACGGGGTTTGCACCACGAGATGTCACTCCAGAGAAATTCCCAACATTCCCATTTTGTGGGCTCCAGAAAGGGGCCACAAAAGAAGTAATAGAGCGGGAAGCGCCAGGGATGGCCCTGGCAATGCTGATGGGATCGCTCAATGTCACACCTCTGGGCATGCTCTCTAG…
>GPHN_216
CCACGACCATCAAATCCGTGTCGGAGTCCTCACAGTGAGTGATAGCTGCTTCAGGAATCTTGCAGAAGACCGCAGTGGGATAAATCTAAAAGATCTTGTCCAAGATCCTTCTTTGTTGGGTGGGACTATATCGGCATACAAGATAGTACCAGATGAAATAGAAGAAATCAAGGAAACACTCATAGACTGGTGTGATGAAAAGGAACTTAATTTAATATTAACAACTGGAGGAACGGGGTTTGCACCACGAGATGTCACTCCAGAGAAATTCCCAACATTCCCATTTTGTGGGCTCCAGAAAGGGGCCACAAAAGAAGTAATAGAGCGGGAAGCGCCAGGGATGGCCCTGGCAATGCTGATGGGATCGCTCAATGTCACACCTCTGGGCATGCTCTCTAG…
>GPHN_217
CCACGACCATCAAATCCGTGTCGGAGTCCTCACAGTGAGTGATAGCTGCTTCAGGAATCTTGCAGAAGACCGCAGTGGGATAAATCTAAAAGATCTTGTCCAAGATCCTTCTTTGTTGGGTGGGACTATATCGGCATACAAGATAGTACCAGATGAAATAGAAGAAATCAAGGAAACACTCATAGACTGGTGTGATGAAAAGGAACTTAATTTAATATTAACAACTGGAGGAACGGGGTTTGCACCACGAGATGTCACTCCAGAGAAATTCCCAACATTCCCATTTTGTGGGCTCCAGAAAGGGGCCACAAAAGAAGTAATAGAGCGGGAAGCGCCAGGGATGGCCCTGGCAATGCTGATGGGATCGCTCAATGTCACACCTCTGGGCATGCTCTCTAG…
>GPHN_218
CCACGACCATCAAATCCGTGTCGGAGTCCTCACAGGATATGCTGGCTCGTGCCTATAATCCCAGCACTGGGGAGGAAGACACAGTGAGTGATAGCTGCTTCAGGAATCTTGCAGAAGACCGCAGTGGGATAAATCTAAAAGATCTTGTCCAAGATCCTTCTTTGTTGGGTGGGACTATATCGGCATACAAGATAGTACCAGATGAAATAGAAGAAATCAAGGAAACACTCATAGACTGGTGTGATGAAAAGGAACTTAATTTAATATTAACAACTGGAGGAACGGGGTTTGCACCACGAGATGTCACTCCAGAGGCCACAAAAGAAGTAATAGAGCGGGAAGCGCCAGGGATGGCCCTGGCAATGCTGATGGGATCGCTCAATGTCACACCTCTGGGCA…
>GPHN_219
CCACGACCATCAAATCCGTGTCGGAGTCCTCACAGGATATGCTGGCTCGTGCCTATAATCCCAGCACTGGGGAGGAAGACACAGTGAGTGATAGCTGCTTCAGGAATCTTGCAGAAGACCGCAGTGGGATAAATCTAAAAGATCTTGTCCAAGATCCTTCTTTGTTGGGTGGGACTATATCGGCATACAAGATAGTACCAGATGAAATAGAAGAAATCAAGGAAACACTCATAGACTGGTGTGATGAAAAGGAACTTAATTTAATATTAACAACTGGAGGAACGGGGTTTGCACCACGAGATGTCACTCCAGAGGCCACAAAAGAAGTAATAGAGCGGGAAGCGCCAGGGATGGCCCTGGCAATGCTGATGGGATCGCTCAATGTCACACCTCTGGGCA…
>GPHN_220
CCACGACCATCAAATCCGTGTCGGAGTCCTCACAGTGAGTGATAGCTGCTTCAGGAATCTTGCAGAAGACCGCAGTGGGATAAATCTAAAAGATCTTGTCCAAGATCCTTCTTTGTTGGGTGGGACTATATCGGCATACAAGATAGTACCAGATGAAATAGAAGAAATCAAGGAAACACTCATAGACTGGTGTGATGAAAAGGAACTTAATTTAATATTAACAACTGGAGGAACGGGGTTTGCACCACGAGATGTCACTCCAGAGAAATTCCCAACATTCCCATTTTGTGGGCTCCAGAAAGGGGCCACAAAAGAAGTAATAGAGCGGGAAGCGCCAGGGATGGCCCTGGCAATGCTGATGGGATCGCTCAATGTCACACCTCTGGGCATGCTCTCTAG…
>GPHN_221
CCACGACCATCAAATCCGTGTCGGAGTCCTCACAGTGAGTGATAGCTGCTTCAGGAATCTTGCAGAAGACCGCAGTGGGATAAATCTAAAAGATCTTGTCCAAGATCCTTCTTTGTTGGGTGGGACTATATCGGCATACAAGATAGTACCAGATGAAATAGAAGAAATCAAGCTTCCATATTTCTTCGTTCTGATGAGAGGCCTTGCCTACTCTTCACTGCTATCAACTGCTTGAGAAGCAAGGAGCTTTAAAAGCCTGAAAGGCATCTTCTAAATTAAGGAAACACTCATAGACTGGTGTGATGAAAAGGAACTTAATTTAATATTAACAACTGGAGGAACGGGGTTTGCACCACGAGATGTCACTCCAGAGGCCACAAAAGAAGTAATAGAGCGGGA…
>GPHN_222
CCACGACCATCAAATCCGTGTCGGAGTCCTCACAGGCTGCCAAAAGAAGGTGTGGTCCAGATTTAGAGATGGCCCTTCAACCTCAAAAGATACAACCAAGAAAAACACCTCACAGTGAGTGATAGCTGCTTCAGGAATCTTGCAGAAGACCGCAGTGGGATAAATCTAAAAGATCTTGTCCAAGATCCTTCTTTGTTGGGTGGGACTATATCGGCATACAAGATAGTACCAGATGAAATAGAAGAAATCAAGGAAACACTCATAGACTGGTGTGATGAAAAGGAACTTAATTTAATATTAACAACTGGAGGAACGGGGTTTGCACCACGAGATGTCACTCCAGAGGCCACAAAAGAAGTAATAGAGCGGGAAGCGCCAGGGATGGCCCTGGCAATGCTG…
>GPHN_223
CCACGACCATCAAATCCGTGTCGGAGTCCTCACAGCTGCTGATGGTCCAGGGGATCGTTTCATCATTGGGGAATCCCAAGCTGGTGAGCAGCCAACTCAGACAGTAATGCCAGGACAAGTGATGCGGGTTACAACAGGTGCTCCAATCCCCTGCGGTGCTGATGCAGTAGTGCAAGTTGAAGATACTGAACTCATCAGGGAATCAGATGATACCCATCGGCCATGACATTAAGAGAGGGGAGTGTGTTTTGGCCAAAGGAACCCATATGGGCCCTTCAGAGATTGGTCTCCTTGCAACTGTGGGTGTCACAGAAGTGGAAGTTAATAAGTTTCCAGTGGTTGCCGTTATGTCAACAGGGAATGAGCTGCTAAATCCTGAAGATGATCTCTTACCAGGAA…
>GPHN_224
CCACGACCATCAAATCCGTGTCGGAGTCCTCACAGTGAGTGATAGCTGCTTCAGGAATCTTGCAGAAGACCGCAGTGGGATAAATCTAAAAGATCTTGTCCAAGATCCTTCTTTGAAACACTCATAGACTGGTGTGATGAAAAGGAACTTAATTTAATATTAACAACTGGAGGAACGGGGTTTGCACCACGAGATGTCACTCCAGAGGCCACAAAAGAAGTAATAGAGCGGGAAGCGCCAGGGATGGCCCTGGCAATGCTGATGGGATCGCTCAATGTCACACCTCTGGGCATGCTCTCTAGACCAGTGTGTGGAATAAGGGGGAAAACTCTGATAATTAACCTACCTGGTAGCAAGAAAGGATCTCAGGAATGCTTTCAGTTCATACTGCCAGCTCTA…
>GPHN_225
CCACGACCATCAAATCCGTGTCGGAGTCCTCACAGTGAGTGATAGCTGCTTCAGGAATCTTGCAGAAGACCGCAGTGGGATAAATCTAAAAGATCTTGTCCAAGATCCTTCTTTGTTGGGTGGGACTATATCGGCATACAAGATAGTACCAGATGAAATAGAAGAAATCAAGGAAACACTCATAGACTGGTGTGATGAAAAGGAACTTAATTTAATATTAACAACTGGAGGAACGGGGTTTGCACCACGAGATGTCACTCCAGAGGCCACAAAAGAAGTAATAGAGCGGGAAGCGCCAGGGATGGCCCTGGCAATGCTGATGGGATCGCTCAATGTCACACCTCTGGGCATGCTCTCTAGACCAGTGTGTGGAATAAGGGGGAAAACTCTGATAATTAA…
>GPHN_226
CCACGACCATCAAATCCGTGTCGGAGTCCTCACAGGTTATCTTACATTAAAAATTGGGAAAAATGGTGCTGTAATGGGCAGTTTCAAGTTTTCATCTTCCTAACTAGAGAGTCCACAGGGAATGAGTGATAGCTGCTTCAGGAATCTTGCAGAAGACCGCAGTGGGATAAATCTAAAAGATCTTGTCCAAGATCCTTCTTTGTTGGGTGGGACTATATCGGCATACAAGATAGTACCAGATGAAATAGAAGAAATCAAGGAAACACTCATAGACTGGTGTGATGAAAAGGAACTTAATTTAATATTAACAACTGGAGGAACGGGGTTTGCACCACGAGATGTCACTCCAGAGGCCACAAAAGAAGTAATAGAGCGGGAAGCGCCAGGGATGGCCCTGGC…
>GPHN_227
CCACGACCATCAAATCCGTGTCGGAGTCCTCACAGTGAGTGATAGCTGCTTCAGGAATCTTGCAGAAGACCGCAGTGGGATAAATCTAAAAGATCTTGTCCAAGATCCTTCTTTGTTGGGTGGGACTATATCGGCATACAAGATAGTACCAGATGAAATAGAAGAAATCAAGGAAACACTCATAGACTGGTGTGATGAAAAGGAACTTAATTTAATATTAACAACTGGAGGAACGGGGTTTGCACCACGAGATGTCACTCCAGAGGCCACAAAAGAAGTAATAGAGCGGGAAGCGCCAGGGATGGCCCTGGCAATGCTGATGGGATCGCTCAATGTCACACCTCTGGGCATGCTCTCTAGACCAGTGTGTGGAATAAGGGGGAAAACTCTGATAATTAA…
>GPHN_228
CCACGACCATCAAATCCGTGTCGGAGTCCTCACAGTGAGTGATAGCTGCTTCAGGAATCTTGCAGAAGACCGCAGTGGGATAAATCTAAAAGATCTTGTCCAAGATCCTTCTTTGTTGGGTGGGACTATATCGGCATACAAGATAGTACCAGATGAAATAGAAGAAATCAAGGAAACACTCATAGACTGGTGTGATGAAAAGGAACTTAATTTAATATTAACAACTGGAGGAACGGGGTTTGCACCACGAGATGTCACTCCAGAGGCCACAAAAGAAGTAATAGAGCGGGAAGCGCCAGGGATGGCCCTGGCAATGCTGATGGGATCGCTCAATGTCACACCTCTGGGCATGCTCTCTAGACCAGTGTGTGGAATAAGGGGGAAAACTCTGATAATTAA…
>GPHN_229
CCACGACCATCAAATCCGTGTCGGAGTCCTCACAGTGAGTGATAGCTGCTTCAGGAATCTTGCAGAAGACCGCAGTGGGATAAATCTAAAAGATCTTGTCCAAGATCCTTCTTTGTTGGGTGGGACTATATCGGCATACAAGATAGTACCAGATGAAATAGAAGAAATCAAGGAAACACTCATAGACTGGTGTGATGAAAAGGAACTTAATTTAATATTAACAACTGGAGGAACGGGGTTTGCACCACGAGATGTCACTCCAGAGGCCACAAAAGAAGTAATAGAGCGGGAAGCGCCAGGGATGGCCCTGGCAATGCTGATGGGATCGCTCAATGTCACACCTCTGGGCATGCTCTCTAGACCAGTGTGTGGAATAAGGGGGAAAACTCTGATAATTAA…
>GPHN_230
CCACGACCATCAAATCCGTGTCGGAGTCCTCACAGTGAGTGATAGCTGCTTCAGGAATCTTGCAGAAGACCGCAGTGGGATAAATCTAAAAGATCTTGTCCAAGATCCTTCTTTGTTGGGTGGGACTATATCGGCATACAAGATAGTACCAGATGAAATAGAAGAAATCAAGGAAACACTCATAGACTGGTGTGATGAAAAGGAACTTAATTTAATATTAACAACTGGAGGAACGGGGTTTGCACCACGAGATGTCACTCCAGAGGCCACAAAAGAAGTAATAGAGCGGGAAGCGCCAGGGATGGCCCTGGCAATGCTGATGGGATCGCTCAATGTCACACCTCTGGGCATGCTCTCTAGACCAGTGTGTGGAATAAGGGGGAAAACTCTGATAATTAA…
>GPHN_231
CCACGACCATCAAATCCGTGTCGGAGTCCTCACAGTGAGTGATAGCTGCTTCAGGAATCTTGCAGAAGACCGCAGTGGGATAAATCTAAAAGATCTTGTCCAAGATCCTTCTTTGTTGGGTGGGACTATATCGGCATACAAGATAGTACCAGATGAAATAGAAGAAATCAAGGAAACACTCATAGACTGGTGTGATGAAAAGGAACTTAATTTAATATTAACAACTGGAGGAACGGGGTTTGCACCACGAGATGTCACTCCAGAGGCCACAAAAGAAGTAATAGAGCGGGAAGCGCCAGGGATGGCCCTGGCAATGCTGATGGGATCGCTCAATGTCACACCTCTGGGCATGCTCTCTAGACCAGTGTGTGGAATAAGGGGGAAAACTCTGATAATTAA…
>GPHN_232
CCACGACCATCAAATCCGTGTCGGAGTCCTCACAGTGAGTGATAGCTGCTTCAGGAATCTTGCAGAAGACCGCAGTGGGATAAATCTAAAAGATCTTGTCCAAGATCCTTCTTTGTTGGGTGGGACTATATCGGCATACAAGATAGTACCAGATGAAATAGAAGAAATCAAGGAAACACTCATAGACTGGTGTGATGAAAAGGAACTTAATTTAATATTAACAACTGGAGGAACGGGGTTTGCACCACGAGATGTCACTCCAGAGGCCACAAAAGAAGTAATAGAGCGGGAAGCGCCAGGGATGGCCCTGGCAATGCTGATGGGATCGCTCAATGTCACACCTCTGGGCATGCTCTCTAGACCAGTGTGTGGAATAAGGGGGAAAACTCTGATAATTAA…
>GPHN_233
CCACGACCATCAAATCCGTGTCGGAGTCCTCACAGTGAGTGATAGCTGCTTCAGGAATCTTGCAGAAGACCGCAGTGGGATAAATCTAAAAGATCTTGTCCAAGATCCTTCTTTGTTGGGTGGGACTATATCGGCATACAAGATAGTACCAGATGAAATAGAAGAAATCAAGGAAACACTCATAGACTGGTGTGATGAAAAGGAACTTAATTTAATATTAACAACTGGAGGAACGGGGTTTGCACCACGAGATGTCACTCCAGAGGCCACAAAAGAAGTAATAGAGCGGGAAGCGCCAGGGATGGCCCTGGCAATGCTGATGGGATCGCTCAATGTCACACCTCTGGGCATGCTCTCTAGACCAGTGTGTGGAATAAGGGGGAAAACTCTGATAATTAA…
>GPHN_234
CCACGACCATCAAATCCGTGTCGGAGTCCTCACAGTGAGTGATAGCTGCTTCAGGAATCTTGCAGAAGACCGCAGTGGGATAAATCTAAAAGATCTTGTCCAAGATCCTTCTTTGTTGGGTGGGACTATATCGGCATACAAGATAGTACCAGATGAAATAGAAGAAATCAAGGAAACACTCATAGACTGGTGTGATGAAAAGGAACTTAATTTAATATTAACAACTGGAGGAACGGGGTTTGCACCACGAGATGTCACTCCAGAGGCCACAAAAGAAGTAATAGAGCGGGAAGCGCCAGGGATGGCCCTGGCAATGCTGATGGGATCGCTCAATGTCACACCTCTGGGCATGCTCTCTAGACCAGTGTGTGGAATAAGGGGGAAAACTCTGATAATTAA…
>GPHN_235
CCACGACCATCAAATCCGTGTCGGAGTCCTCACAGTGAGTGATAGCTGCTTCAGGAATCTTGCAGAAGACCGCAGTGGGATAAATCTAAAAGATCTTGTCCAAGATCCTTCTTTGTTGGGTGGGACTATATCGGCATACAAGATAGTACCAGATGAAATAGAAGAAATCAAGGAAACACTCATAGACTGGTGTGATGAAAAGGAACTTAATTTAATATTAACAACTGGAGGAACGGGGTTTGCACCACGAGATGTCACTCCAGAGGCCACAAAAGAAGTAATAGAGCGGGAAGCGCCAGGGATGGCCCTGGCAATGCTGATGGGATCGCTCAATGTCACACCTCTGGGCATGCTCTCTAGACCAGTGTGTGGAATAAGGGGGAAAACTCTGATAATTAA…
>GPHN_236
CCACGACCATCAAATCCGTGTCGGAGTCCTCACAGTGAGTGATAGCTGCTTCAGGAATCTTGCAGAAGACCGCAGTGGGATAAATCTAAAAGATCTTGTCCAAGATCCTTCTTTGTTGGGTGGGACTATATCGGCATACAAGATAGTACCAGATGAAATAGAAGAAATCAAGGAAACACTCATAGACTGGTGTGATGAAAAGGAACTTAATTTAATATTAACAACTGGAGGAACGGGGTTTGCACCACGAGATGTCACTCCAGAGGCCACAAAAGAAGTAATAGAGCGGGAAGCGCCAGGGATGGCCCTGGCAATGCTGATGGGATCGCTCAATGTCACACCTCTGGGCATGCTCTCTAGACCAGTGTGTGGAATAAGGGGGAAAACTCTGATAATTAA…
>GPHN_237
CCACGACCATCAAATCCGTGTCGGAGTCCTCACAGTGAGTGATAGCTGCTTCAGGAATCTTGCAGAAGACCGCAGTGGGATAAATCTAAAAGATCTTGTCCAAGATCCTTCTTTGTTGGGTGGGACTATATCGGCATACAAGATAGTACCAGATGAAATAGAAGAAATCAAGGAAACACTCATAGACTGGTGTGATGAAAAGGAACTTAATTTAATATTAACAACTGGAGGAACGGGGTTTGCACCACGAGATGTCACTCCAGAGGCCACAAAAGAAGTAATAGAGCGGGAAGCGCCAGGGATGGCCCTGGCAATGCTGATGGGATCGCTCAATGTCACACCTCTGGGCATGCTCTCTAGACCAGTGTGTGGAATAAGGGGGAAAACTCTGATAATTAA…
>GPHN_238
CCACGACCATCAAATCCGTGTCGGAGTCCTCACAGTGAGTGATAGCTGCTTCAGGAATCTTGCAGAAGACCGCAGTGGGATAAATCTAAAAGATCTTGTCCAAGATCCTTCTTTGTTGGGTGGGACTATATCGGCATACAAGATAGTACCAGATGAAATAGAAGAAATCAAGGAAACACTCATAGACTGGTGTGATGAAAAGGAACTTAATTTAATATTAACAACTGGAGGAACGGGGTTTGCACCACGAGATGTCACTCCAGAGGCCACAAAAGAAGTAATAGAGCGGGAAGCGCCAGGGATGGCCCTGGCAATGCTGATGGGATCGCTCAATGTCACACCTCTGGGCATGCTCTCTAGACCAGTGTGTGGAATAAGGGGGAAAACTCTGATAATTAA…
>GPHN_239
CCACGACCATCAAATCCGTGTCGGAGTCCTCACAGTGAGTGATAGCTGCTTCAGGAATCTTGCAGAAGACCGCAGTGGGATAAATCTAAAAGATCTTGTCCAAGATCCTTCTTTGTTGGGTGGGACTATATCGGCATACAAGATAGTACCAGATGAAATAGAAGAAATCAAGGAAACACTCATAGACTGGTGTGATGAAAAGGAACTTAATTTAATATTAACAACTGGAGGAACGGGGTTTGCACCACGAGATGTCACTCCAGAGGCCACAAAAGAAGTAATAGAGCGGGAAGCGCCAGGGATGGCCCTGGCAATGCTGATGGGATCGCTCAATGTCACACCTCTGGGCATGCTCTCTAGATTCCAGACTCCATCATTTCTCGTGGTGTTCAGGTGCTC…
>GPHN_240
CCACGACCATCAAATCCGTGTCGGAGTCCTCACAGTGAGTGATAGCTGCTTCAGGAATCTTGCAGAAGACCGCAGTGGGATAAATCTAAAAGATCTTGTCCAAGATCCTTCTTTGTTGGGTGGGACTATATCGGCATACAAGATAGTACCAGATGAAATAGAAGAAATCAAGGAAACACTCATAGACTGGTGTGATGAAAAGGAACTTAATTTAATATTAACAACTGGAGGAACGGGGTTTGCACCACGAGATGTCACTCCAGAGGTAATCAGATGAGCAGCCGTCTGATGAGCATGCGCAGTGCCAATGGATTATTGATGCTACCTCCAAAGACAGAGCAGTACGTGGAACTTCACAAAGGCGAGGTGGTAGATGTCATGGTCATTGGACGGCTATGA…
>GPHN_241
CCACGACCATCAAATCCGTGTCGGAGTCCTCACAGTGAGTGATAGCTGCTTCAGGAATCTTGCAGAAGACCGCAGTGGGATAAATCTAAAAGATCTTGTCCAAGATCCTTCTTTGTTGGGTGGGACTATATCGGCATACAAGATAGTACCAGATGAAATAGAAGAAATCAAGAAATTCCCAACATTCCCATTTTGTGGGCTCCAGAAAGGGGCCACAAAAGAAGTAATAGAGCGGGAAGCGCCAGGGATGGCCCTGGCAATGCTGATGGGATCGCTCAATGTCACACCTCTGGGCATGCTCTCTAGACCAGTGTGTGGAATAAGGGGGAAAACTCTGATAATTAACCTACCTGGTAGCAAGAAAGGATCTCAGGAATGCTTTCAGTTCATACTGCCAGC…
>GPHN_242
CCACGACCATCAAATCCGTGTCGGAGTCCTCACAGGTTGGGTGGGACTATATCGGCATACAAGATAGTACCAGATGAAATAGAAGAAATCAAGGAAACACTCATAGACTGGTGTGATGAAAAGGAACTTAATTTAATATTAACAACTGGAGGAACGGGGTTTGCACCACGAGATGTCACTCCAGAGGCCACAAAAGAAGTAATAGAGCGGGAAGCGCCAGGGATGGCCCTGGCAATGCTGATGGGATCGCTCAATGTCACACCTCTGGGCATGCTCTCTAGACCAGTGTGTGGAATAAGGGGGAAAACTCTGATAATTAACCTACCTGGTAGCAAGAAAGGATCTCAGGAATGCTTTCAGTTCATACTGCCAGCTCTACCTCATGCCATTGACCTTTTA…
>GPHN_243
CCACGACCATCAAATCCGTGTCGGAGTCCTCACAGGTTGGGTGGGACTATATCGGCATACAAGATAGTACCAGATGAAATAGAAGAAATCAAGGAAACACTCATAGACTGGTGTGATGAAAAGGAACTTAATTTAATATTAACAACTGGAGGAACGGGGTTTGCACCACGAGATGTCACTCCAGAGGCCACAAAAGAAGTAATAGAGCGGGAAGCGCCAGGGATGGCCCTGGCAATGCTGATGGGATCGCTCAATGTCACACCTCTGGGCATGCTCTCTAGACCAGTGTGTGGAATAAGGGGGAAAACTCTGATAATTAACCTACCTGGTAGCAAGAAAGGATCTCAGGAATGCTTTCAGTTCATACTGCCAGCTCTACCTCATGCCATTGACCTTTTA…
>GPHN_244
CCACGACCATCAAATCCGTGTCGGAGTCCTCACAGCCCACATAAACAGACAGAAGACAAAGGAGTTCAGTGTGAAGAAGAGGAAGAAGAAAAGAAAGACAGTGGTGTAGCTTCAACAGAAGATAGTTCCTCATCACATATAACTGCAGCAGCTCTTGCTGCAAAGAAGCATCCATTCTACACCAGTCCTGCTCTTTTCATGGCAAATCATGGGCAGCCCATCCCTGGTCTCATCAGTTATTCCCATCATGCAACAGGCAGTGCAGATAAACGGATTCCAGACTCCATCATTTCTCGTGGTGTTCAGGTGCTCCCACGAGACACAGCCTCCCTTAGCACTACTCCTTCAGAATCGCCCCGTGCTCAGGCTACATCTCGCCTCTCTACAGCTTCTTGTCCA…
>GPHN_245
CCACGACCATCAAATCCGTGTCGGAGTCCTCACAGATGGAATGGGGCGAGTCCTTGCTCAAGATGTATATGCAAAAGACAACCTACCCCCATTCCCTGCATCAGTAAAAGATGGCTATGCTGTTCGAGCTGCTGATGGTCCAGGGGATCGTTTCATCATTGGGGAATCCCAAGCTGGTGAGCAGCCAACTCAGACAGTAATGCCAGGACAAGTGATGCGGGTTACAACAGGTGCTCCAATCCCCTGCGGTGCTGATGCAGTAGTGCAAGTTGAAGATACTGAACTCATCAGGGAATCAGATGATGGTACTGAAGAACTTGAAGTACGAATTCTGGTGCAAGCTCGGCCAGGCCAAGATATCCGACCCATCGGCCATGACATTAAGAGAGGGGAGTGTGT…
>GPHN_246
CCACGACCATCAAATCCGTGTCGGAGTCCTCACAGCTTGCCAACAACATTTGCAACTTTGGATATTGATGGTGTAAGAAAAATTATTTTTGCACTACCAGGGAATCCTGTATCAGCTGTGGTCACCTGCAACCTCTTTGTTGTACCTGCACTGAGAAAGATGCAGGGTATCTTGGATCCTCGGCCAACCATCATCAAAGCCAGGTTATCGTGTGATGTAAAACTGGACCCTCGCCCAGAATACCACCGGTGTATACTGACTTGGCATCACCAAGAACCACTGCCCTGGGCCCAGAGTACAGGTAATCAGATGAGCAGCCGTCTGATGAGCATGCGCAGTGCCAATGGATTATTGATGCTACCTCCAAAGACAGAGCAGTACGTGGAACTTCACAAAGGC…
>GPHN_247
CCACGACCATCAAATCCGTGTCGGAGTCCTCACAGGTCACAGTGCTGTAGATATCACCAAGGTGGCTAGAAGACATCGCATGTCTCCTTTTCCCCTGACGTCTATGGACAAAGCCTTCATTACAGTCCTGGAGATGACTCCGGTGCTTGGTACAGAAATCATCAATTACCGAGATGGAATGGGGCGAGTCCTTGCTCAAGATGTATATGCAAAAGACAACCTACCCCCATTCCCTGCATCAGTAAAAGATGGCTATGCTGTTCGAGCTGCTGATGGTCCAGGGGATCGTTTCATCATTGGGGAATCCCAAGCTGGTGAGCAGCCAACTCAGACAGTAATGCCAGGACAAGTGATGCGGGTTACAACAGGTGCTCCAATCCCCTGCGGTGCTGATGCAGT…
>GPHN_248
CCACGACCATCAAATCCGTGTCGGAGTCCTCACAGGAAACACTCATAGACTGGTGTGATGAAAAGGAACTTAATTTAATATTAACAACTGGAGGAACGGGGTTTGCACCACGAGATGTCACTCCAGAGAAATTCCCAACATTCCCATTTTGTGGGCTCCAGAAAGGGGCCACAAAAGAAGTAATAGAGCGGGAAGCGCCAGGGATGGCCCTGGCAATGCTGATGGGATCGCTCAATGTCACACCTCTGGGCATGCTCTCTAGACCAGTGTGTGGAATAAGGGGGAAAACTCTGATAATTAACCTACCTGGTAGCAAGAAAGGATCTCAGGAATGCTTTCAGTTCATACTGCCAGCTCTACCTCATGCCATTGACCTTTTACGTGATGCCATTGTAAAAG…
>GPHN_249
CCACGACCATCAAATCCGTGTCGGAGTCCTCACAGTGAGTGATAGCTGCTTCAGGAATCTTGCAGAAGACCGCAGTGGGATAAATCTAAAAGATCTTGTCCAAGATCCTTCTTTGCCACAAAAGAAGTAATAGAGCGGGAAGCGCCAGGGATGGCCCTGGCAATGCTGATGGGATCGCTCAATGTCACACCTCTGGGCATGCTCTCTAGACCAGTGTGTGGAATAAGGGGGAAAACTCTGATAATTAACCTACCTGGTAGCAAGAAAGGATCTCAGATTCCAGACTCCATCATTTCTCGTGGTGTTCAGGTGCTCCCACGAGACACAGCCTCCCTTAGCACTACTCCTTCAGAATCGCCCCGTGCTCAGGCTACATCTCGCCTCTCTACAGCTTCTTGT…
>GPHN_250
CCACGACCATCAAATCCGTGTCGGAGTCCTCACAGTGAGTGATAGCTGCTTCAGGAATCTTGCAGAAGACCGCAGTGGGATAAATCTAAAAGATCTTGTCCAAGATCCTTCTTTGTTGGGTGGGACTATATCGGCATACAAGATAGTACCAGATGAAATAGAAGAAATCAAGGCCACAAAAGAAGTAATAGAGCGGGAAGCGCCAGGGATGGCCCTGGCAATGCTGATGGGATCGCTCAATGTCACACCTCTGGGCATGCTCTCTAGACCAGTGTGTGGAATAAGGGGGAAAACTCTGATAATTAACCTACCTGGTAGCAAGAAAGGATCTCAGGAATGCTTTCAGTTCATACTGCCAGCTCTACCTCATGCCATTGACCTTTTACGTGATGCCATTGT…
>GPHN_251
CCACGACCATCAAATCCGTGTCGGAGTCCTCACAGTGAGTGATAGCTGCTTCAGGAATCTTGCAGAAGACCGCAGTGGGATAAATCTAAAAGATCTTGTCCAAGATCCTTCTTTGTTGGGTGGGACTATATCGGCATACAAGATAGTACCAGATGAAATAGAAGAAATCAAGGAAACACTCATAGACTGGTGTGATGAAAAGGAACTTAATTTAATATTAACAACTGGAGGAACGGGGTTTGCACCACGAGATGTCACTCCAGAGGCCACAAAAGAAGTAATAGAGCGGGAAGCGCCAGGGATGGCCCTGGCAATGCTGATGGGATCGCTCAATGTCACACCTCTGGGCATGCTCTCTAGACCAGTGTGTGGAATAAGGGGGAAAACTCTGATAATTAA…
>GPHN_252
CCACGACCATCAAATCCGTGTCGGAGTCCTCACAGTGAGTGATAGCTGCTTCAGGAATCTTGCAGAAGACCGCAGTGGGATAAATCTAAAAGATCTTGTCCAAGATCCTTCTTTGTTGGGTGGGACTATATCGGCATACAAGATAGTACCAGATGAAATAGAAGAAATCAAGGAAACACTCATAGACTGGTGTGATGAAAAGGAACTTAATTTAATATTAACAACTGGAGGAACGGGGTTTGCACCACGAGATGTCACTCCAGAGGCCACAAAAGAAGTAATAGAGCGGGAAGCGCCAGGGATGGCCCTGGCAATGCTGATGGGATCGCTCAATGTCACACCTCTGGGCATGCTCTCTAGACCAGTGTGTGGAATAAGGGGGAAAACTCTGATAATTAA…
>GPHN_253
CCACGACCATCAAATCCGTGTCGGAGTCCTCACAGTGAGTGATAGCTGCTTCAGGAATCTTGCAGAAGACCGCAGTGGGATAAATCTAAAAGATCTTGTCCAAGATCCTTCTTTGTTGGGTGGGACTATATCGGCATACAAGATAGTACCAGATGAAATAGAAGAAATCAAGGAAACACTCATAGACTGGTGTGATGAAAAGGAACTTAATTTAATATTAACAACTGGAGGAACGGGGTTTGCACCACGAGATGTCACTCCAGAGGCCACAAAAGAAGTAATAGAGCGGGAAGCGCCAGGGATGGCCCTGGCAATGCTGATGGGATCGCTCAATGTCACACCTCTGGGCATGCTCTCTAGACCAGTGTGTGGAATAAGGGGGAAAACTCTGATAATTAA…
>GPHN_254
CCACGACCATCAAATCCGTGTCGGAGTCCTCACAGTGAGTGATAGCTGCTTCAGGAATCTTGCAGAAGACCGCAGTGGGATAAATCTAAAAGATCTTGTCCAAGATCCTTCTTTGTTGGGTGGGACTATATCGGCATACAAGATAGTACCAGATGAAATAGAAGAAATCAAGGAAACACTCATAGACTGGTGTGATGAAAAGGAACTTAATTTAATATTAACAACTGGAGGAACGGGGTTTGCACCACGAGATGTCACTCCAGAGAAATTCCCAACATTCCCATTTTGTGGGCTCCAGAAAGGGGCCACAAAAGAAGTAATAGAGCGGGAAGCGCCAGGGATGGCCCTGGCAATGCTGATGGGATCGCTCAATGTCACACCTCTGGGCATGCTCTCTAG…
>GPHN_255
CCACGACCATCAAATCCGTGTCGGAGTCCTCACAGGAAACACTCATAGACTGGTGTGATGAAAAGGAACTTAATTTAATATTAACAACTGGAGGAACGGGGTTTGCACCACGAGATGTCACTCCAGAGGCCACAAAAGAAGTAATAGAGCGGGAAGCGCCAGGGATGGCCCTGGCAATGCTGATGGGATCGCTCAATGTCACACCTCTGGGCATGCTCTCTAGACCAGTGTGTGGAATAAGGGGGAAAACTCTGATAATTAACCTACCTGGTAGCAAGAAAGGATCTCAGATTCCAGACTCCATCATTTCTCGTGGTGTTCAGGTGCTCCCACGAGACACAGCCTCCCTTAGCACTACTCCTTCAGAATCGCCCCGTGCTCAGGCTACATCTCGCCTCT…
>GPHN_256
CCACGACCATCAAATCCGTGTCGGAGTCCTCACAGGAAACACTCATAGACTGGTGTGATGAAAAGGAACTTAATTTAATATTAACAACTGGAGGAACGGGGTTTGCACCACGAGATGTCACTCCAGAGGCCACAAAAGAAGTAATAGAGCGGGAAGCGCCAGGGATGGCCCTGGCAATGCTGATGGGATCGCTCAATGTCACACCTCTGGGCATGCTCTCTAGACCAGTGTGTGGAATAAGGGGGAAAACTCTGATAATTAACCTACCTGGTAGCAAGAAAGGATCTCAGGAATGCTTTCAGTTCATACTGCCAGCTCTACCTCATGCCATTGACCTTTTACGTGATGCCATTGTAAAAGTAAAGGAGGTGCATGATGAACTTGAAGATTTACCTTCCC…
>GPHN_257
CCACGACCATCAAATCCGTGTCGGAGTCCTCACAGTGAGTGATAGCTGCTTCAGGAATCTTGCAGAAGACCGCAGTGGGATAAATCTAAAAGATCTTGTCCAAGATCCTTCTTTGTTGGGTGGGACTATATCGGCATACAAGATAGTACCAGATGAAATAGAAGAAATCAAGGAAACACTCATAGACTGGTGTGATGAAAAGGAACTTAATTTAATATTAACAACTGGAGGAACGGGGTTTGCACCACGAGATGTCACTCCAGAGGCCACAAAAGAAGTAATAGAGCGGGAAGCGCCAGGGATGGCCCTGGCAATGCTGATGGGATCGCTCAATGTCACACCTCTGGGCATGCTCTCTAGACCAGTGTGTGGAATAAGGGGGAAAACTCTGATAATTAA…
>GPHN_258
CCACGACCATCAAATCCGTGTCGGAGTCCTCACAGTGAGTGATAGCTGCTTCAGGAATCTTGCAGAAGACCGCAGTGGGATAAATCTAAAAGATCTTGTCCAAGATCCTTCTTTGTTGGGTGGGACTATATCGGCATACAAGATAGTACCAGATGAAATAGAAGAAATCAAGGAAACACTCATAGACTGGTGTGATGAAAAGGAACTTAATTTAATATTAACAACTGGAGGAACGGGGTTTGCACCACGAGATGTCACTCCAGAGGCCACAAAAGAAGTAATAGAGCGGGAAGCGCCAGGGATGGCCCTGGCAATGCTGATGGGATCGCTCAATGTCACACCTCTGGGCATGCTCTCTAGACCAGTGTGTGGAATAAGGGGGAAAACTCTGATAATTAA…
>GPHN_259
CCACGACCATCAAATCCGTGTCGGAGTCCTCACAGTGAGTGATAGCTGCTTCAGGAATCTTGCAGAAGACCGCAGTGGGATAAATCTAAAAGATCTTGTCCAAGATCCTTCTTTGTTGGGTGGGACTATATCGGCATACAAGATAGTACCAGATGAAATAGAAGAAATCAAGGAAACACTCATAGACTGGTGTGATGAAAAGGAACTTAATTTAATATTAACAACTGGAGGAACGGGGTTTGCACCACGAGATGTCACTCCAGAGGCCACAAAAGAAGTAATAGAGCGGGAAGCGCCAGGGATGGCCCTGGCAATGCTGATGGGATCGCTCAATGTCACACCTCTGGGCATGCTCTCTAGACCAGTGTGTGGAATAAGGGGGAAAACTCTGATAATTAA…
>GPHN_260
CCACGACCATCAAATCCGTGTCGGAGTCCTCACAGTGAGTGATAGCTGCTTCAGGAATCTTGCAGAAGACCGCAGTGGGATAAATCTAAAAGATCTTGTCCAAGATCCTTCTTTGTTGGGTGGGACTATATCGGCATACAAGATAGTACCAGATGAAATAGAAGAAATCAAGGAAACACTCATAGACTGGTGTGATGAAAAGGAACTTAATTTAATATTAACAACTGGAGGAACGGGGTTTGCACCACGAGATGTCACTCCAGAGGCCACAAAAGAAGTAATAGAGCGGGAAGCGCCAGGGATGGCCCTGGCAATGCTGATGGGATCGCTCAATGTCACACCTCTGGGCATGCTCTCTAGACCAGTGTGTGGAATAAGGGGGAAAACTCTGATAATTAA…
>GPHN_261
CCACGACCATCAAATCCGTGTCGGAGTCCTCACAGTGAGTGATAGCTGCTTCAGGAATCTTGCAGAAGACCGCAGTGGGATAAATCTAAAAGATCTTGTCCAAGATCCTTCTTTGTTGGGTGGGACTATATCGGCATACAAGATAGTACCAGATGAAATAGAAGAAATCAAGGAAACACTCATAGACTGGTGTGATGAAAAGGAACTTAATTTAATATTAACAACTGGAGGAACGGGGTTTGCACCACGAGATGTCACTCCAGAGAAATTCCCAACATTCCCATTTTGTGGGCTCCAGAAAGGGGCCACAAAAGAAGTAATAGAGCGGGAAGCGCCAGGGATGGCCCTGGCAATGCTGATGGGATCGCTCAATGTCACACCTCTGGGCATGCTCTCTAG…
>GPHN_262
CCACGACCATCAAATCCGTGTCGGAGTCCTCACAGTGAGTGATAGCTGCTTCAGGAATCTTGCAGAAGACCGCAGTGGGATAAATCTAAAAGATCTTGTCCAAGATCCTTCTTTGTTGGGTGGGACTATATCGGCATACAAGATAGTACCAGATGAAATAGAAGAAATCAAGGAAACACTCATAGACTGGTGTGATGAAAAGGAACTTAATTTAATATTAACAACTGGAGGAACGGGGTTTGCACCACGAGATGTCACTCCAGAGGCCACAAAAGAAGTAATAGAGCGGGAAGCGCCAGGGATGGCCCTGGCAATGCTGATGGGATCGCTCAATGTCACACCTCTGGGCATGCTCTCTAGACCAGTGTGTGGAATAAGGGGGAAAACTCTGATAATTAA…
>GPHN_263
CCACGACCATCAAATCCGTGTCGGAGTCCTCACAGTGAGTGATAGCTGCTTCAGGAATCTTGCAGAAGACCGCAGTGGGATAAATCTAAAAGATCTTGTCCAAGATCCTTCTTTGTTGGGTGGGACTATATCGGCATACAAGATAGTACCAGATGAAATAGAAGAAATCAAGGAAACACTCATAGACTGGTGTGATGAAAAGGAACTTAATTTAATATTAACAACTGGAGGAACGGGGTTTGCACCACGAGATGTCACTCCAGAGGCCACAAAAGAAGTAATAGAGCGGGAAGCGCCAGGGATGGCCCTGGCAATGCTGATGGGATCGCTCAATGTCACACCTCTGGGCATGCTCTCTAGACCAGTGTGTGGAATAAGGGGGAAAACTCTGATAATTAA…
>GPHN_264
CCACGACCATCAAATCCGTGTCGGAGTCCTCACAGTGAGTGATAGCTGCTTCAGGAATCTTGCAGAAGACCGCAGTGGGATAAATCTAAAAGATCTTGTCCAAGATCCTTCTTTGTTGGGTGGGACTATATCGGCATACAAGATAGTACCAGATGAAATAGAAGAAATCAAGGAAACACTCATAGACTGGTGTGATGAAAAGGAACTTAATTTAATATTAACAACTGGAGGAACGGGGTTTGCACCACGAGATGTCACTCCAGAGGCCACAAAAGAAGTAATAGAGCGGGAAGCGCCAGGGATGGCCCTGGCAATGCTGATGGGATCGCTCAATGTCACACCTCTGGGCATGCTCTCTAGACCAGTGTGTGGAATAAGGGGGAAAACTCTGATAATTAA…
>GPHN_265
CCACGACCATCAAATCCGTGTCGGAGTCCTCACAGTGAGTGATAGCTGCTTCAGGAATCTTGCAGAAGACCGCAGTGGGATAAATCTAAAAGATCTTGTCCAAGATCCTTCTTTGTTGGGTGGGACTATATCGGCATACAAGATAGTACCAGATGAAATAGAAGAAATCAAGGAAACACTCATAGACTGGTGTGATGAAAAGGAACTTAATTTAATATTAACAACTGGAGGAACGGGGTTTGCACCACGAGATGTCACTCCAGAGGCCACAAAAGAAGTAATAGAGCGGGAAGCGCCAGGGATGGCCCTGGCAATGCTGATGGGATCGCTCAATGTCACACCTCTGGGCATGCTCTCTAGACCAGTGTGTGGAATAAGGGGGAAAACTCTGATAATTAA…
>GPHN_266
CCACGACCATCAAATCCGTGTCGGAGTCCTCACAGTGAGTGATAGCTGCTTCAGGAATCTTGCAGAAGACCGCAGTGGGATAAATCTAAAAGATCTTGTCCAAGATCCTTCTTTGTTGGGTGGGACTATATCGGCATACAAGATAGTACCAGATGAAATAGAAGAAATCAAGGAAACACTCATAGACTGGTGTGATGAAAAGGAACTTAATTTAATATTAACAACTGGAGGAACGGGGTTTGCACCACGAGATGTCACTCCAGAGGCCACAAAAGAAGTAATAGAGCGGGAAGCGCCAGGGATGGCCCTGGCAATGCTGATGGGATCGCTCAATGTCACACCTCTGGGCATGCTCTCTAGACCAGTGTGTGGAATAAGGGGGAAAACTCTGATAATTAA…
>GPHN_267
CCACGACCATCAAATCCGTGTCGGAGTCCTCACAGTGAGTGATAGCTGCTTCAGGAATCTTGCAGAAGACCGCAGTGGGATAAATCTAAAAGATCTTGTCCAAGATCCTTCTTTGTTGGGTGGGACTATATCGGCATACAAGATAGTACCAGATGAAATAGAAGAAATCAAGGAAACACTCATAGACTGGTGTGATGAAAAGGAACTTAATTTAATATTAACAACTGGAGGAACGGGGTTTGCACCACGAGATGTCACTCCAGAGAAATTCCCAACATTCCCATTTTGTGGGCTCCAGAAAGGGGCCACAAAAGAAGTAATAGAGCGGGAAGCGCCAGGGATGGCCCTGGCAATGCTGATGGGATCGCTCAATGTCACACCTCTGGGCATGCTCTCTAG…
>GPHN_268
CCACGACCATCAAATCCGTGTCGGAGTCCTCACAGATCCTTCGACAAAAACCTATACTAAACAAAACTGGAGAACCTGCATGAAATGGACAAGTTTCTAGACAGATACCAGTGAGTGATAGCTGCTTCAGGAATCTTGCAGAAGACCGCAGTGGGATAAATCTAAAAGATCTTGTCCAAGATCCTTCTTTGTTGGGTGGGACTATATCGGCATACAAGATAGTACCAGATGAAATAGAAGAAATCAAGGAAACACTCATAGACTGGTGTGATGAAAAGGAACTTAATTTAATATTAACAACTGGAGGAACGGGGTTTGCACCACGAGATGTCACTCCAGAGAAATTCCCAACATTCCCATTTTGTGGGCTCCAGAAAGGGGCCACAAAAGAAGTAATAG…
>GPHN_269
CCACGACCATCAAATCCGTGTCGGAGTCCTCACAGTGAGTGATAGCTGCTTCAGGAATCTTGCAGAAGACCGCAGTGGGATAAATCTAAAAGATCTTGTCCAAGATCCTTCTTTCTGCTAAATCCTGAAGATGATCTCTTACCAGGAAAGATTCGGGACAGCAATCGATCAACACTTCTAGCAACAATTCAGGAACATGGTTACCCAACAATCAACCTGGGAATTGTAGGAGACAACCCAGATGACTTACTCAATGCCTTGAATGAGGGTATCAGCCGTGCTGATGTCATCATCACGTCAGGAGGTGTGTCCATGGGGGAAAAGGACTATCTCAAGCAGGTGCTGGACATTGATCTTCATGCTCAGATCCATTTTGGCAGAGTTTTTATGAAGCCAGGC…
>GPHN_270
CCACGACCATCAAATCCGTGTCGGAGTCCTCACAGTGAGTGATAGCTGCTTCAGGAATCTTGCAGAAGACCGCAGTGGGATAAATCTAAAAGATCTTGTCCAAGATCCTTCTTTGCCACAAAAGAAGTAATAGAGCGGGAAGCGCCAGGGATGGCCCTGGCAATGCTGATGGGATCGCTCAATGTCACACCTCTGGGCATGCTCTCTAGACCAGTGTGTGGAATAAGGGGGAAAACTCTGATAATTAACCTACCTGGTAGCAAGAAAGGATCTCAGATTCCAGACTCCATCATTTCTCGTGGTGTTCAGGTGCTCCCACGAGACACAGCCTCCCTTAGCACTACTCCTTCAGAATCGCCCCGTGCTCAGGCTACATCTCGCCTCTCTACAGCTTCTTGT…
>GPHN_271
CCACGACCATCAAATCCGTGTCGGAGTCCTCACAGTGAGTGATAGCTGCTTCAGGAATCTTGCAGAAGACCGCAGTGGGATAAATCTAAAAGATCTTGTCCAAGATCCTTCTTTGTTGGGTGGGACTATATCGGCATACAAGATAGTACCAGATGAAATAGAAGAAATCAAGGCCACAAAAGAAGTAATAGAGCGGGAAGCGCCAGGGATGGCCCTGGCAATGCTGATGGGATCGCTCAATGTCACACCTCTGGGCATGCTCTCTAGACCAGTGTGTGGAATAAGGGGGAAAACTCTGATAATTAACCTACCTGGTAGCAAGAAAGGATCTCAGGAATGCTTTCAGTTCATACTGCCAGCTCTACCTCATGCCATTGACCTTTTACGTGATGCCATTGT…
>GPHN_272
CCACGACCATCAAATCCGTGTCGGAGTCCTCACAGTGAGTGATAGCTGCTTCAGGAATCTTGCAGAAGACCGCAGTGGGATAAATCTAAAAGATCTTGTCCAAGATCCTTCTTTGTTGGGTGGGACTATATCGGCATACAAGATAGTACCAGATGAAATAGAAGAAATCAAGGAAACACTCATAGACTGGTGTGATGAAAAGGAACTTAATTTAATATTAACAACTGGAGGAACGGGGTTTGCACCACGAGATGTCACTCCAGAGGCCACAAAAGAAGTAATAGAGCGGGAAGCGCCAGGGATGGCCCTGGCAATGCTGATGGGATCGCTCAATGTCACACCTCTGGGCATGCTCTCTAGACCAGTGTGTGGAATAAGGGGGAAAACTCTGATAATTAA…
>GPHN_273
CCACGACCATCAAATCCGTGTCGGAGTCCTCACAGTGAGTGATAGCTGCTTCAGGAATCTTGCAGAAGACCGCAGTGGGATAAATCTAAAAGATCTTGTCCAAGATCCTTCTTTGTTGGGTGGGACTATATCGGCATACAAGATAGTACCAGATGAAATAGAAGAAATCAAGGAAACACTCATAGACTGGTGTGATGAAAAGGAACTTAATTTAATATTAACAACTGGAGGAACGGGGTTTGCACCACGAGATGTCACTCCAGAGGCCACAAAAGAAGTAATAGAGCGGGAAGCGCCAGGGATGGCCCTGGCAATGCTGATGGGATCGCTCAATGTCACACCTCTGGGCATGCTCTCTAGACCAGTGTGTGGAATAAGGGGGAAAACTCTGATAATTAA…
>GPHN_274
CCACGACCATCAAATCCGTGTCGGAGTCCTCACAGTGAGTGATAGCTGCTTCAGGAATCTTGCAGAAGACCGCAGTGGGATAAATCTAAAAGATCTTGTCCAAGATCCTTCTTTGTTGGGTGGGACTATATCGGCATACAAGATAGTACCAGATGAAATAGAAGAAATCAAGGAAACACTCATAGACTGGTGTGATGAAAAGGAACTTAATTTAATATTAACAACTGGAGGAACGGGGTTTGCACCACGAGATGTCACTCCAGAGGCCACAAAAGAAGTAATAGAGCGGGAAGCGCCAGGGATGGCCCTGGCAATGCTGATGGGATCGCTCAATGTCACACCTCTGGGCATGCTCTCTAGACCAGTGTGTGGAATAAGGGGGAAAACTCTGATAATTAA…
>GPHN_275
CCACGACCATCAAATCCGTGTCGGAGTCCTCACAGTGAGTGATAGCTGCTTCAGGAATCTTGCAGAAGACCGCAGTGGGATAAATCTAAAAGATCTTGTCCAAGATCCTTCTTTGTTGGGTGGGACTATATCGGCATACAAGATAGTACCAGATGAAATAGAAGAAATCAAGGAAACACTCATAGACTGGTGTGATGAAAAGGAACTTAATTTAATATTAACAACTGGAGGAACGGGGTTTGCACCACGAGATGTCACTCCAGAGAAATTCCCAACATTCCCATTTTGTGGGCTCCAGAAAGGGACCAGTGTGTGGAATAAGGGGGAAAACTCTGATAATTAACCTACCTGGTAGCAAGAAAGGATCTCAGATTCCAGACTCCATCATTTCTCGTGGTG…
>GPHN_276
CCACGACCATCAAATCCGTGTCGGAGTCCTCACAGTGAGTGATAGCTGCTTCAGGAATCTTGCAGAAGACCGCAGTGGGATAAATCTAAAAGATCTTGTCCAAGATCCTTCTTTGTTGGGTGGGACTATATCGGCATACAAGATAGTACCAGATGAAATAGAAGAAATCAAGGAAACACTCATAGACTGGTGTGATGAAAAGGAACTTAATTTAATATTAACAACTGGAGGAACGGGGTTTGCACCACGAGATGTCACTCCAGAGAAATTCCCAACATTCCCATTTTGTGGGCTCCAGAAAGGGGCCACAAAAGAAGTAATAGAGCGGGAAGCGCCAGGGATGGCCCTGGCAATGCTGATGGGATCGCTCAATGTCACACCTCTGGGCATGCTCTCTAG…
>GPHN_277
CCACGACCATCAAATCCGTGTCGGAGTCCTCACAGTGAGTGATAGCTGCTTCAGGAATCTTGCAGAAGACCGCAGTGGGATAAATCTAAAAGATCTTGTCCAAGATCCTTCTTTGTTGGGTGGGACTATATCGGCATACAAGATAGTACCAGATGAAATAGAAGAAATCAAGGAAACACTCATAGACTGGTGTGATGAAAAGGAACTTAATTTAATATTAACAACTGGAGGAACGGGGTTTGCACCACGAGATGTCACTCCAGAGAAATTCCCAACATTCCCATTTTGTGGGCTCCAGAAAGGGGCCACAAAAGAAGTAATAGAGCGGGAAGCGCCAGGGATGGCCCTGGCAATGCTGATGGGATCGCTCAATGTCACACCTCTGGGCATGCTCTCTAG…
