# Supplementary material for: Complex regulation of Gephyrin splicing is a determinant of inhibitory postsynaptic diversity
Source: Research Square preprint supplement (doi:10.21203/rs.3.rs-1111489/v1), 2021-12-16
Supplement: Supplementary file 2 [file 3075caed01df063f062562f4.xlsx]

## Sheet: Feuil1
	Exon 1	Exon 2	Exon 3	Exon 4	Exon 5	Exon 6	Exon 7	Exon 8	Exon 9	Exon 10	Exon 11	Exon 12	Exon 13	Exon 14	Exon 15	Exon 16	Exon 17	Exon 18	Exon 19	Exon 20	Exon 21	Exon 22	Exon 23	Exon 24	Exon 25	Exon 26	Exon 27	Exon 28	Exon 29	Exon 30	Exon 31	Exon 32	Exon 33	Exon 34	Exon 35	Exon 36	Exon 37	Exon 38	Exon 39	Exon 40	Exon 41	Exon 42
human_adrenal_gland	100	0.246807	0.00139439	0	95.1038	0.0353245	0.00604235	0.000464796	0.00790154	96.5972	0.154312	97.379	4.27287	95.4264	95.5393	98.2965	97.5147	0.0646067	0.0409021	94.2574	0.289103	0.000929593	0.0199862	0.0483388	0	0	0.262145	93.2962	98.7097	98.2914	0.0334653	97.2703	98.8478	98.006	98.4996	98.9198	98.7869	98.8431	98.7655	98.9124	99.7537	100
human_brain_cerebellum	100	0.751162	0.00395869	0	98.1543	0.0494836	0.0217728	0.00148451	0.00643287	94.7191	0.179131	97.6866	7.98171	98.1726	97.4407	99.3201	17.9883	0.0217728	0.0133606	98.9267	24.6364	0.455744	5.29524	5.53128	0.261768	0.224161	10.3431	95.7865	97.5337	97.5194	0.048494	96.4688	97.3447	94.3841	95.2055	97.9915	97.5115	98.0256	99.2459	99.4022	99.6922	100
human_brain_whole	100	1.66	0.00710415	0	98.6715	0.029206	0.0047361	0	0.00749883	95.6791	0.153923	92.5363	13.0428	90.6659	90.2172	91.1419	22.7218	0.0272326	0.0161817	88.989	27.4552	0.0015787	1.2302	5.97538	0.00552545	0.00197338	6.71461	90.8337	92.3559	91.9135	0.874205	90.9797	92.318	91.5476	92.0272	92.3721	92.2853	95.6661	95.6053	95.1558	95.8216	100
human_fetal_brain	100	0.23657	0.58928	0.00142942	98.6796	0.0246576	0.647886	0.00142942	0.211555	96.8381	0.184396	98.2968	7.18428	97.8823	97.1694	99.0519	12.7208	0.00857654	0.0182252	99.445	12.1733	0.00500298	2.44753	0.021084	0.000357356	0.00285885	7.4573	97.6354	97.7844	98.79	0.0432401	97.7558	98.2211	97.4131	97.9213	99.7338	99.6094	99.1959	99.5737	99.6841	99.7684	100
human_fetal_liver	100	0.23086	0.00499541	0	98.5624	0.0313998	0.00535223	0.000713631	0.0107045	96.6577	0.167703	98.9178	11.1059	99.0641	94.215	99.6778	98.754	0.0685085	0.0510246	99.2764	0.336477	0.00142726	0.0296157	0.0260475	0.000713631	0	0.282598	97.9708	99.5986	99.1708	0.0378224	97.6297	87.4758	87.0587	87.5129	99.6296	99.5197	99.5822	99.4773	99.6278	99.7499	100
human_heart	100	0.224406	0.00451068	0.000563835	98.8238	0.0267821	0.00310109	0.000563835	0.00704793	96.8561	0.115022	59.7924	6.75981	64.6199	64.6845	64.967	62.6916	0.044261	0.0501813	69.7858	0.242449	0.000845752	0.0219895	0.849699	0.00140959	0.000845752	0.192831	76.9344	78.1945	77.8441	0.0267821	77.0942	78.1303	74.0377	74.3954	78.1714	78.0826	78.1404	78.0677	78.2179	99.755	100
human_kidney	100	0.254926	0.0029344	0.078862	97.7688	0.0271432	0.0080696	0.0007336	0.0062356	96.2227	0.166527	95.7231	4.0249	98.6935	98.8097	99.8151	98.9909	0.397978	0.0502516	97.9995	1.30508	0.0051352	0.867482	0.0260428	0.001834	0.0014672	0.278768	97.4977	99.1487	98.1007	0.0381472	97.5799	98.6564	98.1913	98.6953	99.134	99.017	99.6189	99.543	99.6952	99.7421	100
human_liver	100	0.852692	0.00729489	0	96.0729	0.666267	0.0113476	0.000810544	0.00810544	94.2686	0.166972	94.712	3.88331	96.526	96.5957	97.0553	95.666	0.446609	0.0518748	95.9254	0.511453	0.0121582	0.605476	0.0599802	0.000810544	0.00243163	0.335565	95.3921	97.9445	98.6642	0.0324217	97.647	99.2032	98.7299	99.2243	99.6288	99.5177	99.5931	99.5096	99.6344	99.7487	100
human_lung	100	0.240637	0.00533958	0.000355972	98.7053	0.0238501	0.00498361	0.000711944	0.0088993	96.7429	0.15556	99.0335	1.79801	99.2671	99.3678	99.7853	91.0658	0.0555316	0.0334614	84.7964	0.249892	0.000711944	0.0167307	0.0177986	0.000355972	0.000355972	0.237077	98.0948	99.6796	99.2386	0.0405808	98.1945	99.6223	99.1969	99.6793	99.6807	99.5686	99.6312	99.5483	99.7163	99.769	100
human_placenta	100	0.205679	0.00306984	0.00122794	98.6437	0.0423638	0.00613968	0	0.00491174	96.8375	3.29885	97.7664	2.71312	99.0582	99.1533	99.6384	98.6487	0.0644666	0.0454336	99.2264	0.391097	0.00429777	0.0331543	0.0362241	0	0	0.281811	97.907	99.5549	99.1343	0.0288565	97.9592	96.3782	95.9619	96.4273	99.5825	99.5058	99.5463	99.4689	99.6224	99.7427	100
human_prostate	100	0.167653	0.47742	0.000823849	94.3443	0.0346016	0.00782656	0	0.0115339	93.4277	0.0374851	92.8564	3.02558	94.004	94.0646	94.9428	92.5565	0.0185366	0.0168889	94.369	0.441995	0.00123577	0.0469594	0.0959784	0.000823849	0.000411924	0.204726	93.7095	93.8689	94.528	0.0539621	93.9665	99.4365	98.9574	99.4624	99.5724	99.5514	99.5465	99.4629	99.1185	99.7014	100
human_salivary_gland	100	0.23317	0.00363618	0.000454523	98.6023	0.0354528	0.00727236	0	0.00727236	96.8556	0.158628	98.9414	0.468158	97.2465	99.2659	99.7791	98.7528	0.0745417	0.059088	99.3309	0.349528	0.00181809	0.0345437	0.0404525	0.00181809	0	0.284986	97.8692	96.7165	99.2078	0.0349983	98.046	97.871	99.0841	99.6259	99.675	99.5509	99.6223	99.5123	99.6796	99.7459	100
human_skeletal_muscle	100	0.228836	0.00128559	0	98.6315	0.042746	0.00610658	0.000642797	0.00899916	90.0868	0.134666	81.2284	3.15935	87.1418	87.2212	87.6557	86.8095	0.0713505	0.0382464	86.0625	0.317221	0.00257119	0.0324613	0.673652	0.00192839	0	0.251012	91.418	92.9479	92.5056	0.0321399	91.5485	92.8633	91.7664	92.2514	92.9546	92.8389	92.8958	92.8293	92.9665	99.7557	100
human_small_intestine	100	0.253501	0.00216139	0	98.6065	0.0299508	0.00679295	0.00154385	0.00957189	96.5788	0.150989	90.8212	1.70935	93.5915	93.7057	94.1142	93.1295	0.0617541	0.0490945	93.7023	0.349528	0.00154385	0.0302595	0.0305683	0.000926312	0.00185262	0.270483	92.0458	90.4293	93.4707	0.0262455	92.5145	93.8653	93.4096	93.9252	93.9496	93.8249	93.9808	93.8839	94.0555	99.7422	100
human_spleen	100	0.217142	0.00371819	0.000371819	98.6763	0.0237964	0.00334637	0.000743638	0.0078082	96.8161	0.152074	99.0675	0.345048	99.2854	99.4025	99.8301	93.1559	0.0695302	0.0442465	99.4185	0.306751	0.000743638	0.0223091	0.0263992	0.000743638	0.000371819	0.285185	98.0658	99.7275	99.2939	0.0330919	98.245	99.6828	99.2192	99.7025	99.7159	99.5746	99.6728	99.5821	99.723	99.7661	100
human_stomach	100	0.282692	0.00982936	0.00117952	98.6058	0.0342062	0.00471809	0.000393174	0.00747032	93.6931	0.152945	98.9526	0.430919	99.1496	99.2628	99.7303	98.7607	0.0613352	0.0381379	99.2172	0.382559	0.00235905	0.0259495	0.0361721	0.000393174	0	0.268538	97.9429	99.5766	99.1071	0.0369584	98.189	99.5534	99.0521	99.5707	99.6182	99.5612	99.6115	99.5199	99.6768	99.7472	100
human_testis	100	0.261636	0.00129203	0.000646016	97.2745	0.74421	2.53044	0.24484	0.00710617	94.9385	0.15569	94.2278	1.66801	95.3467	95.4288	97.622	93.1477	0.080752	0.264866	97.2086	0.542007	0.10207	0.41345	0.0503892	0.00323008	0.00258406	0.325592	96.4605	96.8397	96.412	0.0368229	96.6885	98.1078	98.1388	98.6653	98.7545	98.6111	98.6666	98.6065	98.759	99.7293	100
human_thymus	100	0.231682	0.00834532	0.00119219	98.5873	0.0365605	0.0162932	0.00119219	0.0103323	96.8014	0.162535	98.9525	4.02562	99.1416	99.2171	99.7139	97.9172	0.0759027	0.0520589	99.2692	0.468928	0.0147037	2.37524	0.0377526	0.000794793	0.00119219	0.396999	97.988	99.6121	99.1659	0.0369579	98.1795	99.5533	99.0749	99.5724	99.6264	99.5327	99.5585	99.4965	99.6706	99.7461	100
human_thyroid_gland	100	0.238818	0.00483275	0.000402729	98.6025	0.0406756	0.00805458	0	0.0056382	96.785	0.164716	98.9928	2.45584	99.1724	99.3061	99.7845	98.7258	0.0805458	0.0418838	99.3186	3.50616	0.0028191	0.0382592	0.0362456	0.00120819	0.000402729	0.313726	97.967	99.6484	99.1861	0.0350374	98.0512	98.2594	97.7645	98.2961	99.6577	99.559	99.6138	99.5236	99.6831	99.7676	100
human_trachea	100	0.24422	0.0037054	0.00134742	98.5731	0.0377277	0.00606338	0	0.00707395	95.7071	0.172133	98.9325	0.396141	99.168	99.2818	99.7457	98.8348	0.0666972	0.0501913	99.3044	0.369193	0.00269484	0.0296432	0.032338	0.000673709	0.000673709	0.283295	97.9038	99.6268	99.1498	0.032338	97.3095	99.5486	99.0794	99.5789	99.6295	99.5112	99.5894	99.4812	99.6544	99.7649	100
human_uterus	100	0.226559	0.00391848	0.00106868	98.7208	4.16285	0.00605583	0.000712451	0.00997432	96.8837	0.167426	99.0624	0.366556	99.2526	99.3502	99.8019	96.4677	0.0708889	0.044172	99.4037	7.62893	0.00213735	0.0270731	0.0263607	0.0014249	0.000712451	0.311697	98.0596	99.71	99.279	0.0341977	98.0148	93.3614	92.9239	93.3892	99.7115	99.5925	99.642	99.5519	99.71	99.7585	100
